# Supplementary material for: Optimising patient active role with a user-centred eHealth platform (CONCERTO+) in chronic diseases management: a study protocol for a pilot cluster randomised controlled trial
Source: PubMed Central journal article supplement — BMJ Open. 2019 Apr 2;9(4):e028554. doi: 10.1136/bmjopen-2018-028554 (PMC6500232; doi:10.1136/bmjopen-2018-028554), 2019-04-02
Supplement: bmjopen-2018-028554.draft_revisions.pdf [file bmjopen-2018-028554.draft_revisions.pdf]

# BMJ Open

BMJ Open is committed to open peer review. As part of this commitment we make the peer review history of every article we publish publicly available.

When an article is published we post the peer reviewers' comments and the authors' responses online. We also post the versions of the paper that were used during peer review. These are the versions that the peer review comments apply to.

The versions of the paper that follow are the versions that were submitted during the peer review process. They are not the versions of record or the final published versions. They should not be cited or distributed as the published version of this manuscript.

BMJ Open is an open access journal and the full, final, typeset and author-corrected version of record of the manuscript is available on our site with no access controls, subscription charges or pay-per-view fees (<http://bmjopen.bmj.com>).

If you have any questions on BMJ Open's open peer review process please email [info.bmjopen@bmj.com](mailto:info.bmjopen@bmj.com)

# BMJ Open

## Optimizing patient active role with a user-centered eHealth platform (CONCERTO+) in chronic diseases management: A study protocol for a pilot cluster randomized controlled trial

|                               |                                                                                                                                                                                                                                                                                                                                                                                                                                                                                                                                                                                                                                                                                                                                                                                                                                                                                                                                                                                                                                                                                                                                                                                                                                                                                                                                                                                                                                                          |
|-------------------------------|----------------------------------------------------------------------------------------------------------------------------------------------------------------------------------------------------------------------------------------------------------------------------------------------------------------------------------------------------------------------------------------------------------------------------------------------------------------------------------------------------------------------------------------------------------------------------------------------------------------------------------------------------------------------------------------------------------------------------------------------------------------------------------------------------------------------------------------------------------------------------------------------------------------------------------------------------------------------------------------------------------------------------------------------------------------------------------------------------------------------------------------------------------------------------------------------------------------------------------------------------------------------------------------------------------------------------------------------------------------------------------------------------------------------------------------------------------|
| Journal:                      | <i>BMJ Open</i>                                                                                                                                                                                                                                                                                                                                                                                                                                                                                                                                                                                                                                                                                                                                                                                                                                                                                                                                                                                                                                                                                                                                                                                                                                                                                                                                                                                                                                          |
| Manuscript ID                 | bmjopen-2018-028554                                                                                                                                                                                                                                                                                                                                                                                                                                                                                                                                                                                                                                                                                                                                                                                                                                                                                                                                                                                                                                                                                                                                                                                                                                                                                                                                                                                                                                      |
| Article Type:                 | Protocol                                                                                                                                                                                                                                                                                                                                                                                                                                                                                                                                                                                                                                                                                                                                                                                                                                                                                                                                                                                                                                                                                                                                                                                                                                                                                                                                                                                                                                                 |
| Date Submitted by the Author: | 14-Dec-2018                                                                                                                                                                                                                                                                                                                                                                                                                                                                                                                                                                                                                                                                                                                                                                                                                                                                                                                                                                                                                                                                                                                                                                                                                                                                                                                                                                                                                                              |
| Complete List of Authors:     | Gagnon, Marie-Pierre; University of Laval, Ndiaye, Mame-Awa; University of Laval, Faculty of nursing<br>Larouche, Alain; Groupe Santé Concerto<br>Chabot, Guylaine; Groupe Santé Concerto<br>Chabot, Christian; International Business Machines Corporation<br>Buyl, Ronald; Vrje Universiteit Brussel, Jette, Belgium<br>Fortin, Jean-Paul; Centre de Recherche sur les Soins et les Services de Première Ligne de l'Université Laval; Université Laval, Département de médecine sociale et préventive<br>Giguere, Anik; Laval university research centre on primary care and services, ; Université Laval Faculte de medecine, Family Medicine and Emergency medicine<br>LeBlanc, Annie; Centre de Recherche sur les Soins et les Services de Première Ligne de l'Université Laval<br>Legare, France; CHU de Quebec and Université Laval,<br>Motulsky, Aude; Department of Health Management, Evaluation and Policy, School of Public Health<br>Sicotte, Claude; Université de Montreal Faculte de medecine,<br>Witteman, Holly; Faculté de médecine de l'Université Laval<br>Kavanagh, Eric; École de design, Université Laval<br>Lépinay, Frédéric; École de design, Université Laval<br>Roberge, Jacynthe; École de design, Université Laval,<br>Délétröz, Carole; School of Health Sciences (HESAV), HES-SO University of Applied Sciences and Arts Western Switzerland Lausanne<br>Abbasgholizadeh Rahimi, Samira; CHU de Quebec-Université Laval |
| Keywords:                     | Chronic disease management, Multimorbidity, eHealth, Health Literacy, User-centered design, Patient and caregiver engagement                                                                                                                                                                                                                                                                                                                                                                                                                                                                                                                                                                                                                                                                                                                                                                                                                                                                                                                                                                                                                                                                                                                                                                                                                                                                                                                             |
|                               |                                                                                                                                                                                                                                                                                                                                                                                                                                                                                                                                                                                                                                                                                                                                                                                                                                                                                                                                                                                                                                                                                                                                                                                                                                                                                                                                                                                                                                                          |

SCHOLARONE™  
Manuscripts

1  
2  
3  
4  
5  
6  
7  
8  
9  
10  
11  
12  
13  
14  
15  
16  
17  
18  
19  
20  
21  
22  
23  
24  
25  
26  
27  
28  
29  
30  
31  
32  
33  
34  
35  
36  
37  
38  
39  
40  
41  
42  
43  
44  
45  
46  
47  
48  
49  
50  
51  
52  
53  
54  
55  
56  
57  
58  
59  
60

# Optimizing patient active role with a user-centered eHealth platform (CONCERTO+) in chronic diseases management: A study protocol for a pilot cluster randomized controlled trial

Marie-Pierre Gagnon<sup>1, 2</sup>, Mame Awa Ndiaye<sup>2</sup>, Alain Larouche<sup>3</sup>, Guylaine Chabot, Christian Chabot<sup>4</sup>, Ronald Buyl<sup>5</sup>, Jean-Paul Fortin<sup>6</sup>, Anik Giguère<sup>7</sup>, Annie LeBlanc<sup>6</sup>, France Légaré<sup>1, 6</sup>, Aude Motulsky<sup>8</sup>, Claude Sicotte<sup>8</sup>, Holly O.Witteman<sup>7</sup>, Éric Kavanagh<sup>9</sup>, Frédéric Lépinay<sup>9</sup>, Jacynthe Roberge<sup>9</sup>, Carole Délétroz<sup>10</sup>, Samira Rahimi Abbasgholizadeh<sup>11</sup>

## Author's affiliations

<sup>1</sup> Research Centre of the CHU de Québec, Hôpital Saint-François d'Assise, 10 rue de l'Espinay, D6726, Quebec City, QC, G1L 3 L5, Canada

<sup>2</sup> Faculty of Nursing, Université Laval, Quebec City, QC, Canada

<sup>3</sup> Groupe Santé Concerto, Montréal, Qc, Canada

<sup>4</sup> International Business Machines Corporation, Quebec City, Qc, Canada

<sup>5</sup> Vrje Universiteit Brussel, Jette, Belgium

1  
2  
3 <sup>6</sup> Centre de Recherche sur les Soins et les Services de Première Ligne de l'Université Laval,  
4 Quebec city, Canada  
5  
6

7 <sup>7</sup> Department of Family and Emergency Medicine, Université Laval, Quebec City, QC, Canada  
8  
9

10 <sup>8</sup> Department of Health Management, Evaluation and Policy, School of Public Health, Université  
11 de Montréal, Qc, Canada  
12  
13

14 <sup>9</sup> École de design, Université Laval, Quebec City, QC, Canada  
15  
16

17 <sup>10</sup> School of Health Sciences (HESAV), HES-SO University of Applied Sciences and Arts Western  
18 Switzerland Lausanne.  
19  
20

21 <sup>11</sup>Centre Hospitalier Universitaire de Québec, Quebec City, QC, Canada  
22  
23

24 Correspondence to

25  
26  
27 Pr Marie-Pierre Gagnon; [marie-pierre.gagnon@fsi.ulaval.ca](mailto:marie-pierre.gagnon@fsi.ulaval.ca)  
28  
29  
30  
31  
32  
33  
34  
35  
36  
37  
38  
39  
40  
41  
42  
43  
44  
45  
46  
47  
48  
49  
50  
51  
52  
53  
54  
55  
56  
57  
58  
59  
60

## Abstract

**Introduction** Multimorbidity increases care needs and primary care use among people with chronic disease. The Concerto Health Program (CHP) has been developed to optimize chronic disease management in primary care services. However, in its current version, the CHP primarily targets clinicians and does not aim to answer directly patients' and their informal caregivers' needs for chronic disease management. Various studies have shown that interventions that increase patient activation level are associated with better health outcomes. Furthermore, educational tools must be adapted to patients and caregivers in terms of health literacy and usability. This project aims to develop, implement and evaluate a user-centered, multifunctional and personalized eHealth platform (CONCERTO+) to promote a more active patient role in chronic disease management and decision-making.

1  
2  
3 **Methods and analysis** This project uses a collaborative research approach,  
4  
5  
6  
7 aiming at the personalization of CHP through 3 phases: 1) the development of  
8  
9  
10  
11 one module of an eHealth platform combining scientific evidence and user-  
12  
13  
14 centered design; 2) a feasibility study of CONCERTO+ through a pilot cluster  
15  
16  
17 randomized controlled trial where patients with chronic disease from a primary  
18  
19  
20  
21  
22 healthcare practice will receive CONCERTO+ during 6 months and be compared  
23  
24  
25  
26 to patients from a control practice receiving usual care; and 3) an analysis of  
27  
28  
29  
30 CONCERTO+ potential for scaling up. To do so, we will conduct two focus  
31  
32  
33  
34 groups with patients and informal caregivers and individual interviews with health  
35  
36  
37 professionals at the two study sites, as well as health care managers, information  
38  
39  
40  
41 officers and representatives of the Ministry of Health.  
42  
43  
44  
45  
46  
47  
48  
49

50 **Ethics and dissemination** This study has ethical approval from Ethics Committee  
51  
52  
53 of Université Laval. The findings will be used to inform the effectiveness of  
54  
55  
56  
57  
58  
59  
60

1  
2  
3 CONCERTO+ to improve management care in chronic disease. We will  
4  
5  
6  
7 disseminate findings through presentations in scientific conferences and  
8  
9  
10  
11 publication in peer reviewed journals.  
12  
13  
14  
15  
16  
17  
18  
19

20 **Trial registration:** Clinicaltrials.gov ID: NCT03628963  
21  
22  
23

24 **Keywords:** Chronic disease management, Multimorbidity, eHealth, Patient and  
25  
26  
27  
28  
29  
30  
31  
32  
33  
34  
35  
36  
37  
38  
39  
40  
41  
42  
43  
44  
45  
46  
47  
48  
49  
50  
51  
52  
53  
54  
55  
56  
57  
58  
59  
60

caregiver engagement, Health Literacy, User-centered design.

#### Strengths and limitations of this study

- The design of a user-centered technological solution is adapted to

1  
2  
3  
4 chronic disease patients' needs and their literacy level.  
5  
6  
7

- 8
- 9 • The inclusion of the caregivers in the use of CONCERTO+ is a novelty.  
10  
11
  - 12 • The pilot test will provide data for feasibility, acceptability and usefulness  
13  
14 of CONCERTO+.  
15  
16
  - 17 • Good potential for sustainability given that it will be implemented in the  
18  
19 real context of primary care practice with the collaboration of clinical  
20  
21 teams.  
22  
23
  - 24 • As a limitation, this project seems ambitious for its entire achievement  
25  
26 in two years.  
27  
28  
29  
30  
31  
32  
33  
34  
35  
36  
37  
38  
39  
40  
41  
42  
43  
44  
45  
46  
47  
48  
49  
50  
51  
52  
53  
54  
55  
56  
57  
58  
59  
60



## Introduction

## Background

Chronic diseases are the number one cause of mortality in the world, and account for nearly 70% of deaths [1]. In Canada and around the world, multimorbidity, which means people who have more than two chronic diseases, is increasing [2]. In addition to often making life more difficult for the people living with these conditions, such the rise in cases is putting pressure on the Canadian healthcare system and causing over-consumption of care and services [3]. In the Province of Quebec, 45% of people aged 20 and over have more than two chronic diseases [4], and 80% of chronic disease consultations are done in primary health care services [5]. Multimorbidity increases care needs as well as the complexity of

1  
2  
3 health care services required in primary care, especially when it comes to applying  
4  
5  
6  
7 recommendations for good clinical practices [5]. The total cost of the six most  
8  
9  
10 common chronic diseases in Quebec (ischemic heart disease, cerebrovascular  
11  
12  
13 disease, chronic obstructive pulmonary disease, cancer, hypertension and  
14  
15  
16 diabetes) has been estimated at 8, 1 billion, and this may rise up to \$13 billion in  
17  
18  
19  
20  
21  
22 2030 if no substantial change is made [6].  
23  
24

25  
26  
27 In Quebec, primary care services have the main responsibility to support people  
28  
29  
30 with chronic diseases and their informal caregivers, jointly with other stakeholders  
31  
32  
33 of the local health network [7, 8]. However, primary care services suffer from many  
34  
35  
36  
37 challenges and organizational constraints, in particular, the difficulty of access –  
38  
39  
40  
41 with a large proportion of Quebecers without a family doctor – and the wait times  
42  
43  
44  
45 that are among the longest in Canada [9, 10]. Furthermore, the fragmentation of  
46  
47  
48  
49 health care processes and the gaps in information transfer are recognized sources  
50  
51  
52  
53 of inefficiency, that make critical the integration and continuity of care for chronic  
54  
55  
56  
57  
58  
59  
60

1  
2  
3 diseases [7, 11]. To overcome these issues, many approaches linking healthcare  
4  
5  
6  
7 providers, patients, caregivers and the organization of health care services are  
8  
9  
10 promoted [12]. The central role of patients in the management of their disease,  
11  
12  
13  
14 which depends on their active involvement, is recognized as a key component in  
15  
16  
17  
18 chronic disease management [13].  
19  
20  
21  
22

23 Active patient involvement requires that patients have the knowledge, skills and  
24  
25  
26 self-confidence to manage their health and healthcare [14]. Various studies have  
27  
28  
29  
30 shown that interventions increasing patient activation level are associated with  
31  
32  
33  
34 better health outcomes [15-22] and decreased costs [23]. However, active patient  
35  
36  
37  
38 involvement and the quality of the interactions with health providers will partially  
39  
40  
41  
42 depend on patient's knowledge of the disease and the needed care, in addition to  
43  
44  
45  
46 their interpersonal skills as well as their ability to communicate their expectations,  
47  
48  
49  
50 needs and preferences to their healthcare team [24, 25]. It is therefore important  
51  
52  
53  
54 to offer patients and caregivers relevant information adapted to their health literacy  
55  
56  
57  
58  
59  
60

1  
2  
3 level. According the following definition, “Health literacy is linked to literacy and  
4  
5  
6  
7 entails people’s knowledge, motivation and competences to access, understand,  
8  
9  
10  
11 appraise and apply health information in order to make judgements and take  
12  
13  
14 decisions in everyday life concerning health care, disease prevention and health  
15  
16  
17 promotion to maintain or improve quality of life during the life course” [26]. For their  
18  
19  
20  
21 part, health professionals must also have the communicational and interpersonal  
22  
23  
24 skills required to work in a team and share information appropriately with patients  
25  
26  
27 in order to support their active involvement [24]. Thus, it becomes important to act  
28  
29  
30  
31 in advance by supporting patients’ autonomy and involvement in the care dynamic,  
32  
33  
34 and by promoting informational and educational relationships in disease  
35  
36  
37 management [25-27]. Therefore, it is crucial that information and educational tools  
38  
39  
40  
41 are adapted to patients and caregivers in terms of literacy level and presentation  
42  
43  
44  
45  
46  
47  
48 [28-30].  
49  
50  
51  
52  
53  
54  
55  
56  
57  
58  
59  
60

1  
2  
3 eHealth technologies offer a potential to support chronic disease management.  
4  
5

6  
7 Some studies have shown positive effects on clinical processes (better adherence  
8  
9  
10  
11 to care protocol, reduced errors and improved monitoring and callback rates), on  
12  
13  
14  
15 quality of care and effectiveness, and on patient outcomes [31-36].  
16  
17

18  
19 Systematic reviews support the role of electronic personal health records and  
20  
21  
22  
23 electronic portals allowing patient access to their health records in order to promote  
24  
25  
26  
27 their active participation in their care [37-39]. However, to achieve expected  
28  
29  
30  
31 outcomes, eHealth technologies first should be adopted and used in an appropriate  
32  
33  
34  
35 manner by patients and health professionals [40]. Therefore, end-user involvement  
36  
37  
38  
39 in the development of eHealth solutions is an imperative [41]. Moreover, eHealth  
40  
41  
42  
43 literacy, which is inspired by the health literacy concept but focuses specifically on  
44  
45  
46  
47 optimal eHealth solutions use, should be considered in order to ensure that the  
48  
49  
50  
51 solutions are adapted to the capabilities of targeted users [30, 42]. While the  
52  
53  
54  
55  
56  
57  
58  
59  
60 number of eHealth solutions continues to increase, with more than 325,000 mobile

1  
2  
3 health applications in 2017 [43], the majority of them (53%) are used by less than  
4  
5  
6  
7 5,000 people and are often abandoned after a short trial period [44-46]. User  
8  
9  
10 involvement – including patients, informal caregivers and health professionals – is  
11  
12  
13 identified to be among the issues to ensure that eHealth solutions have a real  
14  
15  
16 impact, all the stakeholders must be promoted throughout the different stages of  
17  
18  
19 technology development, from conception to assessment [47]. Based on efficient  
20  
21  
22 chronic care models, high-potential technologies and patient involvement as active  
23  
24  
25 partner of their care, we suggest to develop an innovative and mobilizing project in  
26  
27  
28 order to improve patient care and experience.  
29  
30  
31  
32  
33  
34  
35  
36  
37

## 38 Methods and analysis:

39  
40  
41  
42  
43 The following methods adhere to the Standard Protocol Items Recommendations  
44  
45  
46  
47 for Interventional Trials (SPIRIT) guidelines for the reporting of study protocols.  
48  
49  
50  
51  
52  
53  
54  
55  
56  
57  
58  
59  
60

1  
2  
3  
4 This project is a collaborative work involving IT developers from CHP, designers,  
5  
6  
7 clinicians, technological partners and patient representatives. The aim is to  
8  
9  
10 develop, implement and evaluate a module of a multifunctional and personalized  
11  
12  
13 eHealth platform, CONCERTO+, through a pilot study for optimizing patient active  
14  
15  
16 role in medical follow-up, decision-making, satisfaction towards healthcare  
17  
18  
19 services and quality of life. The specific objectives are to: 1) develop a module of a  
20  
21  
22 multifunctional and personalized eHealth platform integrated to the CHP for  
23  
24  
25 patients and caregivers allowing them to engage in the follow-up and management  
26  
27  
28 of their chronic diseases; 2) test the integration of CONCERTO+ in monitoring care  
29  
30  
31 pathways of three frequent co-existing chronic diseases (diabetes, hypertension,  
32  
33  
34 dyslipidemia) and assess the usefulness and acceptability of the solution for  
35  
36  
37 patients with chronic diseases and their caregivers; 3) assess the scalability of the  
38  
39  
40  
41  
42  
43  
44  
45  
46  
47  
48  
49 CONCERTO+ solution.  
50

## 51 52 53 Phase 1: Development of the eHealth solution module 54 55 56 57 58 59 60

1  
2  
3 We will conduct a rapid literature review on the effects of eHealth interventions for  
4  
5  
6  
7 supporting active involvement of patients with chronic diseases in their primary  
8  
9  
10  
11 care team. For this purpose, we will follow the rapid review method suggested by  
12  
13  
14 Lawani et al. [48] and consider the latest evidence on eHealth interventions for  
15  
16  
17  
18 chronic diseases monitoring and care. We will consider the following “Problem,  
19  
20  
21  
22 Intervention, Comparison, Outcomes (PICO)” elements: (P): three targeted chronic  
23  
24  
25  
26 diseases (diabetes, high blood pressure, dyslipidemia), alone or combined; (I) all  
27  
28  
29 eHealth interventions implemented in primary care and that directly involve patients  
30  
31  
32  
33 (e.g. Electronic Medical Records, patient diary, patient portal, specific  
34  
35  
36  
37 computerized monitoring for a chronic disease and technological interventions  
38  
39  
40  
41 focused on lifestyle modifications; (C): routine follow-up; (O): Health outcomes  
42  
43  
44  
45 specific to the disease (e.g. HbA1c for diabetes), generic health outcomes (e.g.  
46  
47  
48  
49 mortality, quality of life), patient outcomes (e.g. involvement, personal efficacy) and  
50  
51  
52  
53 practices and process outcomes (e.g. test numbers, emergency visits,  
54  
55  
56  
57  
58  
59  
60



1  
2  
3 hospitalizations). First, we will start to consult existing systematic reviews, in  
4  
5  
6  
7 particular that of Irizarry et al. [38], and a review of reviews that we have already  
8  
9  
10  
11 completed [49]. We will also document issues relating to needs, expectations and  
12  
13  
14 concerns in terms of eHealth solutions for patients, their informal caregivers, and  
15  
16  
17 health care providers. This information will provide evidence summaries describing  
18  
19  
20 each eHealth solution associated with each targeted health issues, as well as  
21  
22  
23 information on the risks and benefits of these solutions. We will then use the  
24  
25  
26 methods suggested by Giguère et al. [50] to develop Decision Boxes to involve  
27  
28  
29 patients and their informal caregivers in the choice of functionalities and contents  
30  
31  
32 to develop in the CONCERTO+ solution, in line with an integrated care system (**Fig.**  
33  
34  
35  
36  
37  
38  
39  
40  
41 **1**).  
42  
43  
44

45 A first prototype will be developed by the design and technology teams, in close  
46  
47  
48 collaboration with researchers, health professionals and patient representatives  
49  
50  
51 who will identify the functionalities to include in the CONCERTO+ solution. Given  
52  
53  
54  
55  
56  
57  
58  
59  
60

1  
2  
3 the time limit of the project, we will classify the required functionalities in 3 types:  
4  
5  
6

7 1) essential and priority; 2) important but not priority; 3) required in the future.  
8  
9

10 For the development of the eHealth platform module, a user-centered approach  
11  
12 will be used, based on three cycles with users. Iterative testing sessions will take  
13  
14 place at the usability laboratory of UL lead by HW, providing all the equipment  
15  
16 needed to conduct usability studies. Students in graphic and interaction design,  
17  
18 under the direction of three experts from the School of Design of UL (EK, FLP, JR),  
19  
20 will participate in the development of the platform's visual environment. An expert  
21  
22 in eHealth literacy (CD) will ensure that contents of the clinical monitoring tools  
23  
24 already integrated in the CHP are adapted to a general audience according to  
25  
26 recommendations of the Health Literacy Guide [51], in addition of tools that provide  
27  
28 understandable information (e.g link to a popular glossary of medical terms:  
29  
30 [https://publications.santemontreal.qc.ca/uploads/tx\\_asssmpublications/litteratie\\_v  
33  
34 9.pdf](https://publications.santemontreal.qc.ca/uploads/tx_asssmpublications/litteratie_v<br/>31<br/>32 9.pdf)).  
35  
36  
37  
38  
39  
40  
41  
42  
43  
44  
45  
46  
47  
48  
49  
50  
51  
52  
53  
54  
55  
56  
57  
58  
59  
60

1  
2  
3 The integration of the CONCERTO+ solution with the CHP will be ensured by the  
4  
5  
6  
7 Concerto Health Group team who will work closely with the designers and  
8  
9  
10  
11 researchers. Health professionals in primary care services from the sites  
12  
13  
14 participating in the pilot project will also be consulted to validate the match between  
15  
16  
17 the CONCERTO + solution and care pathways for professionals offered by the  
18  
19  
20  
21  
22 CHP.  
23  
24  
25

## 26 Patient and Public Involvement

27  
28  
29  
30  
31 **How was the development of the research question and outcome measures**  
32  
33  
34 **informed by patients' priorities, experience, and preferences?**  
35  
36  
37  
38

39 A patient partner (informal caregiver) is involved as research partner at key stages  
40  
41  
42 of the study. His experience in caring of a patient with diabetes informed us on  
43  
44  
45 needs of patients, research focus, methods for collecting data for the study and  
46  
47  
48  
49  
50 dissemination strategy through patient and citizen groups associations.  
51  
52  
53

54  
55 **How did you involve patients in the design of this study?**  
56  
57  
58  
59  
60

1  
2  
3 Our patient partner is invited at each research team meeting to make sure that the  
4  
5  
6  
7 research questions are aligned with patients' needs. He gives his input in refining  
8  
9  
10  
11 the focus of the research questions. He made valuable contributions in the design  
12  
13  
14  
15 of the study.  
16  
17  
18

### 19 **Were patients involved in the recruitment to and conduct of the study?**

20  
21  
22  
23 In the first step of the study, the development of the first prototype, our patient  
24  
25  
26  
27 partner helped us to recruit patients by sharing the invitation through his personal  
28  
29  
30  
31 contacts and network and gave feedback for the pros and cons of the prototype  
32  
33  
34  
35 development. He was also invited to contribute in editing the paper and is  
36  
37  
38  
39 considered as a coauthor.  
40  
41  
42

### 43 **How will the results be disseminated to study participants?**

44  
45  
46  
47 To develop our dissemination strategy, we will review the results with the patient  
48  
49  
50  
51 partner and integrate his feedback to ensure that we presented the results in the  
52  
53  
54  
55 most effective way for the general populations. We will send a summary of the  
56  
57  
58  
59  
60

1  
2  
3 research results to study participants who have provided their mailing address in  
4  
5  
6  
7 the consent form and we will also organise events for patients and citizen groups  
8  
9  
10  
11 and associations, such as outreach communications and scientific café.  
12  
13  
14  
15  
16  
17

18 **For randomised controlled trials, was the burden of the intervention assessed by**  
19  
20  
21 **patients themselves?**  
22  
23  
24  
25  
26  
27  
28  
29

30 For this part of the study, participants will assess the burden of the intervention by  
31  
32  
33 participating in focus groups.  
34  
35  
36  
37

## 38 Phase 2: Pilot cluster randomized clinical trial

39  
40  
41  
42

43 The Phase 2 of the project will consist in a feasibility study based on a pilot cluster  
44  
45  
46 randomized clinical trial (c-RCT). Given the nature of the intervention, patients with  
47  
48  
49  
50 chronic diseases are followed by a small team of primary care clinicians.  
51  
52  
53

### 54 *Study setting*

55  
56  
57  
58  
59  
60

1  
2  
3 The study will be conducted in two Family Medicine Groups (FMG) from the same  
4  
5  
6  
7 health region (in the province of Quebec) but covering distinct areas, they have  
8  
9  
10  
11 been selected as the clusters.  
12  
13

### 14 15 ***Eligibility criteria***

16  
17  
18  
19  
20 Patients with two or more targeted chronic diseases (diabetes, hypertension,  
21  
22  
23  
24 dyslipidemia) and who had three or more visits in the last 12 months will be eligible.  
25  
26

27  
28 Majors whose incapacity has been recognized judicially are in exclusion criteria.  
29  
30

### 31 32 ***Intervention***

33  
34  
35  
36  
37 The intervention is the device CONCERTO+, a user-centered, multifunctional and  
38  
39  
40  
41 personalized eHealth platform. Both groups, Experimental and control have the  
42  
43  
44  
45 same features with regard to participants eligibility. Experimental group from FMG  
46  
47  
48  
49 1 will use CONCERTO+ application during 6 months. The Control group from FMG  
50  
51  
52  
53 2 will not use the application CONCERTO+ but continue to receive usual care. The  
54  
55  
56  
57  
58  
59  
60

1  
2  
3 objective is to assess the feasibility, acceptability and potential effectiveness of the  
4  
5  
6  
7 device CONCERTO+.  
8  
9

## 10 11 *Outcomes*

12  
13  
14  
15  
16 The involvement of patients following the use of CONCERTO+ will be our primary  
17  
18  
19  
20 outcome of interest. We will use Patient Activation Measure (PAM) [52] which is  
21  
22  
23  
24 built on patient knowledge, skills and confidence that are directly targeted by the  
25  
26  
27 intervention.  
28  
29

30  
31  
32 The score of the activation level obtained (between 0 and 100) shows the degree  
33  
34  
35 of ability to manage their health with confidence according to the following scale  
36  
37  
38 ranges: strongly disagree = 1; disagree = 2; agree = 3; strongly agree = 4. Patients  
39  
40  
41  
42 who are more activated have better health outcomes. Patients answer to a survey  
43  
44  
45  
46 of 13 questions with the following scoring for each answer:  
47  
48  
49

- 50  
51 1. Not believing that activation is important ( $\leq 47$ )  
52  
53
- 54  
55 2. Lack of knowledge or confidence to take action (47.1 - 55.1)  
56  
57

1  
2  
3  
4 3. Beginning to take action (55.2 - 67)  
5  
6  
7

8 4. Taking action ( $\geq 67.1$ ).  
9  
10

11  
12 The PAM 13 questionnaire has been validated in French (see **Supplementary File**  
13

14  
15  
16 3). We will ask a license to use, which is free for up to 250 patients in an academic  
17  
18  
19  
20 research context [53]. The survey will be completed by participants of the two  
21  
22  
23  
24 groups at baseline, and six months later. This period of CONCERTO+ use is  
25  
26  
27  
28 enough to achieve the intended outcomes.  
29

30  
31  
32 Secondary outcomes of interest are: 1) the impact of CONCERTO+ use on process  
33  
34  
35  
36 indicators and care outcomes, measured with questions adapted from Glasgow et  
37  
38  
39 al. [54] and validated in the previous Concerto Health Program (CHP) assessment;  
40  
41  
42  
43 Patients answer to a questionnaire after six months use of CONCERTO+. 5 scales  
44  
45  
46  
47 based on the key components of CONCERTO+ are defined, and each scale  
48  
49  
50  
51 include items: solving-problems/advices, delivery System design/decision support,  
52  
53  
54  
55 goal setting/tailoring, follow-up / coordination, overall care. Items are scored on a  
56  
57  
58  
59  
60



1  
2  
3 5-point scale ranging from 1 (Almost never) to 5 (Almost always), passing through  
4  
5  
6  
7 subscales (Generally not); (Sometimes); Most of the time. Higher scores from the  
8  
9  
10  
11 assessment survey have better effects in care outcomes.  
12

13  
14  
15 2) The acceptability of the device CONCERTO+ will be assessed by patient and  
16  
17  
18 informal caregiver, at the end of the intervention with:  
19  
20

21  
22  
23 1. A short survey adapted from the Technology Acceptance Model [55] that  
24  
25  
26 includes 3 criteria (perceived ease of use, perceived usefulness, behavioral  
27  
28  
29 intention to use) with the following scoring: Strongly disagree = 1; Disagree = 2;  
30  
31  
32 Agree = 3; strongly agree = 4. Higher scores rates have a better acceptance of  
33  
34  
35 the use of CONCERTO+.  
36  
37  
38

39  
40  
41  
42 2. The use of CONCERTO+ that will be measured by logs (Tests numbers,  
43  
44  
45  
46 emergency visits, and hospitalizations). (See **Supplementary File 1, 3**).  
47  
48  
49

### 50 *Participant timeline*

51  
52  
53  
54  
55  
56  
57  
58  
59  
60

**Table 1** shows the distribution of outcomes measures through time. The first survey

will be completed at baseline and six months after the use of CONCERTO+, in

| Time point                                                                           | Study period      |                     |                                                |                                                                    |
|--------------------------------------------------------------------------------------|-------------------|---------------------|------------------------------------------------|--------------------------------------------------------------------|
|                                                                                      | Allocation<br>out | Post allocation     | Close                                          |                                                                    |
|                                                                                      | -T1               | T1<br>(at baseline) | T2<br>(6 months after the<br>use of Concerto+) | T3:<br>During 3 months<br>following the end of<br>the intervention |
| <b>Enrolment</b><br>- Eligibility<br>screen<br>- informed<br>consent<br>- Allocation |                   |                     |                                                |                                                                    |
| <b>Intervention group</b>                                                            | ✓                 | ✓                   | ✓                                              | ✓                                                                  |
| <b>Usual care group</b>                                                              | ✓                 |                     |                                                |                                                                    |
| <b>Assessments</b>                                                                   |                   |                     |                                                |                                                                    |
| Main outcome<br>measure<br>PAM measure                                               |                   | ✓                   | ✓                                              |                                                                    |
| Secondary<br>outcome measure                                                         |                   |                     | ✓                                              |                                                                    |

order to

see the

effects of

the use of

CONCERTO+ during the process care. The second survey will be completed six

months after in order to assess the effects of

|                                   |  |   |   |             |
|-----------------------------------|--|---|---|-------------|
| Glasgow and al.<br>Adapted survey |  |   |   | the use     |
| Technology<br>Acceptance Model    |  | ✓ |   | and the     |
| Logs measures                     |  | ✓ |   | third       |
| Two Focus groups                  |  |   |   | survey will |
| Interviews                        |  |   | ✓ | be          |
|                                   |  |   | ✓ | completed   |

by patients and informal caregivers at the end of the intervention in order to assess the acceptability.

For peer review only

### ***Sample size calculation***

Based on a similar study [56], a sample of 200 patients is enough to detect a difference of 2 points on the PAM score, with a power of 90% and an alpha of 0.05.

Indeed, the assessment of online education intervention to chronic disease patients, showed a significant difference of 6 points on the PAM score in the experimental group (n = 58), whereas the difference was not significant in the control group (n = 68) [56]. Such a difference may be considered clinically significant because each additional point on the PAM score is associated with a 2% decrease in hospitalizations [53]. Considering an attrition rate of 15%, the sample size should remain relevant to detect a difference of at least 2 points on the PAM score, as differences reported in similar studies range from 2.5 to 6.5 points [14].

### ***Recruitment strategy***

1  
2  
3  
4 For the first phase 1, the development of the eHealth solution module, we will  
5  
6  
7 recruit 7 to 10 patients and informal caregivers from convenience samples of  
8  
9  
10  
11 volunteers joined through patient associations and mailing lists of our institution  
12  
13  
14 (Université Laval-UL). Eligible individuals will meet the following criteria: 1) Have  
15  
16  
17 two or more targeted chronic diseases (diabetes, hypertension, dyslipidemia) 2)  
18  
19  
20 had three or more visits in the last 12 months; 3) aged 18 years old and over and  
21  
22  
23 come from the greater Quebec area; 4) having in interest of technology; 5) be able  
24  
25  
26 to speak and read in French; 6) available to participate in three validation sessions.  
27  
28  
29  
30  
31  
32

33  
34 For the phase 2, the pilot cluster randomized clinical trial: a note will be added in  
35  
36  
37 the EMR (electronic Medical Record) of patients who had been preselected, and  
38  
39  
40  
41 at their next visit at the FMG, the receptionist will give them an information sheet  
42  
43  
44  
45 about the study to invite them to participate. Interested patients will be invited to  
46  
47  
48  
49 call the research assistant using a toll free number or to leave their contact  
50  
51  
52  
53 information to the receptionist who will forward them to the research assistant.  
54  
55  
56  
57  
58  
59  
60

1  
2  
3 Then, patients will be contacted by the research assistant to validate their eligibility  
4  
5  
6  
7 and confirm their interest. Recruitment will end when 100 patients are recruited  
8  
9  
10  
11 from each site. We will ensure an equal distribution of participants according to  
12  
13  
14 their sex, and we will consider specific aspects in patient recruitment, particularly  
15  
16  
17 living alone, the presence of dependents and their literacy level. The recruitment  
18  
19  
20  
21  
22 chart is presented in **Fig. 2**  
23  
24  
25

### 26 *Allocation*

27  
28  
29  
30 Patient will be selected randomly with the help of the participating FMG by  
31  
32  
33  
34 searching the local EMR system. A pre-selection of patients will be done by the  
35  
36  
37  
38 four nurses involved in chronic disease care at the participating FMG. For each  
39  
40  
41  
42 site, a sample of 200 patients (see sample size calculation) stratified by sex, age  
43  
44  
45  
46 group and number of chronic diseases, will be randomly preselected by a  
47  
48  
49  
50 statistician not involved in the team, using a computerized program. Then, the  
51  
52  
53  
54 statistician will reveal group assignment through a call to the responsible of each  
55  
56  
57  
58  
59  
60

1  
2  
3 FMG in the presence of a research team member.  
4  
5  
6  
7

### 8 *Blinding* 9

10  
11  
12  
13 The blinding will be single by the outcome assessor.  
14  
15

### 16 17 Phase 3: Scaling-up potential of the solution 18 19

20  
21  
22 For Phase 3, the analysis of CONCERTO+ potential for scaling-up will be done by  
23  
24  
25 documenting factors and conditions associated with the sustainability and scaling-  
26  
27  
28 up of the solution. To do so, we will conduct: 1) two focus groups with patients and  
29  
30  
31 informal caregivers who participated in the study (1 with the experimental group  
32  
33  
34 and 1 with the control group, each group gathering between 8 and 12 participants);  
35  
36  
37  
38 2) semi-structured individual interviews with health professionals as well as with  
39  
40  
41 health care managers, information officers, and representatives of the Ministry of  
42  
43  
44  
45 Health and Social Services will be conducted at the two study sites two FMG of  
46  
47  
48  
49 one region in the Province of Quebec). The number of interviews will be determined  
50  
51  
52  
53  
54  
55  
56  
57  
58  
59  
60

1  
2  
3 according to the data saturation principle, but is estimated to be around 15  
4  
5  
6  
7 participants in total. Interviews with patients, informal caregivers and health  
8  
9  
10 professionals will include questions about factors facilitating or limiting sustained  
11  
12 use of the CONCERTO+ solution by patients and informal caregivers, and the  
13  
14 support of this use by health professionals, inspired by a recent study on personal  
15  
16 electronic health record [58, 59]. Questions for managers and decision-makers will  
17  
18 be based on Expand Net framework [60] that proposes 12 elements helping to  
19  
20 appreciate the potential of innovation expansion at different time of its progress  
21  
22  
23  
24  
25  
26  
27  
28  
29  
30  
31  
32  
33  
34 (see **Supplementary File 2,4**).

## 35 36 37 38 39 Data analysis plan

40  
41  
42  
43  
44 The study started in 2017 and will end in 2019. Data will be collected managed and  
45  
46  
47 analysed at each step of the project. For the phase 1, we started to collect data in  
48  
49  
50  
51  
52 October 2018; for the phase2, we will start in April 2019 and the phase 3 in  
53  
54  
55  
56  
57  
58  
59  
60 November 2019. We will ensure that surveys are correctly completed in order to



1  
2  
3 avoid many missing data. Quantitative data will be analyzed using standard  
4  
5  
6  
7 statistical model Anova, we will compare the scores test for repeated  
8  
9  
10  
11 measurements, controlling the initial PAM score. We will also make tests according  
12  
13  
14 to sex, literacy level and comorbidity because these variables are associated with  
15  
16  
17 the PAM score [57]. Focus groups discussions and interviews will be recorded with  
18  
19  
20 participants' consent, and the content will be transcribed verbatim. The qualitative  
21  
22  
23 analysis will consist in a thematic-pragmatic content analysis [61] using the NVivo  
24  
25  
26 10 software. We will use an inductive-deductive analysis, in an iteratively and  
27  
28  
29 flexible way, which allows a hybrid codification from the conceptual dimensions of  
30  
31  
32 the model and the emergent themes [62]. We will verify the role of the identified  
33  
34  
35 dimension in the literature as the initial basis for analysis, while remaining open to  
36  
37  
38 the advent of other context-specific aspects. Results from qualitative analyses will  
39  
40  
41 be cross with quantitative data to see commonalities among participants'  
42  
43  
44 characteristics. The investigators will compare intervention and control groups to  
45  
46  
47  
48  
49  
50  
51  
52  
53  
54  
55  
56  
57  
58  
59  
60

1  
2  
3 judge the effectiveness of CONCERTO+ and will inform if there is an effect in their  
4  
5  
6  
7 health status. Participants will also be asked about the helpfulness of the device in  
8  
9  
10  
11 supporting their disease self-management.  
12  
13

## 14 15 Monitoring

16  
17  
18  
19 A Data Monitoring Committee is not required for this study due to low risk of  
20  
21  
22  
23 adverse events. The principal investigator has the authority to suspend or terminate  
24  
25  
26  
27 the study at any time if any big trouble occurs.  
28  
29  
30

## 31 32 Ethics and dissemination

33  
34  
35  
36  
37 This study has ethical approval from the Research Ethics Committee of Université  
38  
39  
40  
41 Laval; approval number: 2018-067 /01-06-2018 with all protocol modifications  
42  
43  
44  
45 being mandatory to report (see **Supplementary Files 5, 6**). All participants will  
46  
47  
48  
49 provide their consent following a procedure approved by the ethics board (see  
50  
51  
52  
53 **Supplementary Files 7-9**) before enrollment in the study. We have to communicate  
54  
55  
56  
57  
58  
59  
60

1  
2  
3 with the ethics committee if any change occurs to the protocol. All data will be  
4  
5  
6  
7 anonymised and will be used only for statistical research and analysis. They will be  
8  
9  
10  
11 securely stored on the server of Canadian Research Chair on Technologies and  
12  
13  
14 Practices in Health, we will never share it with third parties. Only the principal  
15  
16  
17 investigator or his nominee and eventually students who work in the project will  
18  
19  
20  
21 have access on the list of participants in different phases of the project. Data from  
22  
23  
24  
25  
26 EMR will be also anonymised by a medical secretary or a research assistant who  
27  
28  
29  
30 will sign a confidentiality agreement. In addition, all team members will sign a  
31  
32  
33  
34 confidentiality agreement so that any personal information of participants will not  
35  
36  
37  
38 be shared.  
39  
40

41  
42 In keeping with our participative approach and inspired by frameworks of  
43  
44  
45 collaboration between researchers and knowledge users [63, 64], knowledge  
46  
47  
48  
49 translation will be done in an integrated way throughout the project, with an  
50  
51  
52  
53 emphasis on collaboration, shared outcomes, and feedback from stakeholders at  
54  
55  
56  
57  
58  
59  
60

1  
2  
3 each step of the research. We will also share the outcomes through presentations  
4  
5  
6  
7 in the networks and organizations of the team members, and through the  
8  
9  
10 production of dissemination tools for patient and citizen groups and associations.  
11  
12  
13 Ideally, these presentations will be done in tandem (patient-researcher; patient-  
14  
15 clinician) in an interactive way, by taking the time for discussion and exchanges  
16  
17  
18 with the audience (e.g. lunch and learn, scientific café). The presentations will be  
19  
20  
21 supported with materials (brief reports, narrated slideshows, etc.) allowing a  
22  
23  
24 greater dissemination of the activities and outcomes. Knowledge translation  
25  
26  
27 activities at the end of project will consist of publishing outcomes in open access /  
28  
29  
30 peer reviewed journals. Presentations at national and international conferences in  
31  
32  
33 health informatics, chronic diseases, and patient engagement are also scheduled.  
34  
35  
36  
37  
38  
39  
40  
41  
42  
43  
44

## 45 Study status

46  
47  
48  
49  
50  
51  
52  
53  
54  
55  
56  
57  
58  
59  
60

1  
2  
3 This is an ongoing study taking place from December 2017 until December 2019.  
4  
5  
6

7 At the time of writing, the prototype of the eHealth technology module was designed  
8  
9  
10  
11 and the first usability test is done.  
12  
13  
14

## 15 Discussion

16  
17  
18  
19  
20  
21 This project shows a potential of success through the involvement of the  
22  
23  
24  
25 technological partner who has a long collaborative experience with researchers.  
26  
27

28  
29 The eHealth solution is also likely to be acceptable because it will be adapted to  
30  
31  
32 patient's needs, based on our user-centered approach and the adaptation of the  
33  
34  
35  
36 content to users' literacy level. Previous results associated with the use of the CHP  
37  
38  
39  
40 solution for clinicians show promising preliminary outcomes based on validated  
41  
42  
43  
44 measures that are relevant and sensitive to the proposed intervention. The solution  
45  
46  
47  
48 has also a good potential for sustainability given that it will be implemented in the  
49  
50  
51  
52 real context of primary care practice, with the collaboration of clinical teams. Finally,  
53  
54  
55  
56 the project team is engaged in disseminating the results and pursuing the  
57  
58  
59  
60

1  
2  
3 development and adaptation of the CONCERTO+ solution in order to contribute to  
4  
5  
6  
7 improving the health of people in Canada and internationally.  
8  
9  
10  
11  
12  
13  
14  
15

## 16 List of abbreviations

17  
18  
19  
20  
21 **CHP:** Concerto Health Program  
22  
23

24  
25  
26 **c-RCT:** cluster randomized clinical trial  
27  
28

29  
30 **EMR:** Electronic Medical Record  
31  
32

33  
34 **FMG:** Family medicine Group  
35  
36

37  
38 **IT:** Information Technology  
39  
40

41  
42 **PAM:** Patient activation measure  
43  
44

45  
46  
47 **PICO:** Problem, Intervention, Comparison-Outcomes  
48  
49

50  
51 **SPOR:** Strategy of Patient-Oriented Research  
52  
53

54  
55 **UL:** Université Laval  
56  
57

## References

1. World Health Organization. WHO - Global status report on noncommunicable diseases. 2014.  
[http://apps.who.int/iris/bitstream/handle/10665/148114/9789241564854\\_eng.pdf](http://apps.who.int/iris/bitstream/handle/10665/148114/9789241564854_eng.pdf).
2. Roberts KC, Rao DP, Bennett TL, Loukine L, Jayaraman GC. Prevalence and patterns of chronic disease multimorbidity and associated determinants in Canada. *Health Promot Chronic Dis Prev Can*. 2015;**35**:87-94.

- 1  
2  
3  
4 3. Health Council of Canada. Helping patients help themselves: are Canadians  
5  
6  
7 with chronic conditions getting the Support they need to manage their  
8  
9  
10  
11 health? 2010. [https://healthcouncilcanada.ca/files/2.17-](https://healthcouncilcanada.ca/files/2.17-AR1_HCC_Jan2010.pdf)  
12  
13  
14  
15 AR1\_HCC\_Jan2010.pdf  
16  
17  
18  
19  
20  
21  
22  
23 4. Ruel, G. (2012). Multimorbidité : Ampleur, impacts et défi. In: *4e Rendez-*  
24  
25  
26 *vous des maladies chroniques*. Quebec: Institut national de santé publique  
27  
28  
29  
30  
31 du Québec (accessed 28 Apr 2017).  
32  
33  
34  
35  
36  
37  
38  
39  
40  
41 5. Fortin M, Contant E, Savard C, Hudon C, Poitras M-E, Almirall J. Canadian  
42  
43  
44 guidelines for clinical practice: an analysis of their quality and relevance to  
45  
46  
47  
48 the care of adults with comorbidity. *BMC Fam Pract*. 2011;**12:74**.  
49  
50  
51  
52  
53  
54  
55  
56  
57  
58  
59  
60



- 1  
2  
3  
4 6. Bounajm F, Dinh T, Thériault L: Améliorer les habitudes de vie: des  
5  
6  
7 retombées importantes pour la santé et l'économie du Québec. 2017.  
8  
9  
10  
11 <https://www.conferenceboard.ca/temp/7230eaa9-bb8f-43ae-8ecb>  
12  
13  
14 969e71c8c696/6647\_SanteEtEconomieDuQuebec\_RPT.pdf (accessed 29  
15  
16  
17  
18 May 2018).
- 19  
20  
21  
22  
23  
24  
25  
26 7. The Commissaire à la Santé et au Bien-Être. Adopting an integrated  
27  
28  
29 approach to chronic disease prevention and management:  
30  
31  
32  
33 recommendations, issues and implications, 2010.  
34  
35  
36  
37 <https://www.csbe.gouv.qc.ca/fileadmin/www/2010/MaladiesChroniques/CSB>  
38  
39  
40  
41 E\_T4\_Recommandations2010.pdf  
42  
43  
44  
45  
46  
47  
48  
49  
50  
51 8. Ministère de la Santé et des Services Sociaux. Cadre de référence pour la  
52  
53  
54  
55 prévention et la gestion des maladies chroniques physiques en première  
56  
57  
58  
59  
60

1  
2  
3 ligne.2012. <http://publications.msss.gouv.qc.ca/msss/fichiers/2012/12-942->

4  
5  
6  
7 [01F.pdf](#)  
8  
9  
10  
11  
12  
13  
14  
15  
16

17 9. FMOQ, The Fédération des médecins omnipraticiens du Québec.  
18

19  
20  
21 Communiqué de la FMOQ: La FRMOQ lance une nouvelle campagne  
22

23  
24 publicitaire pour rappeler l'urgence d'investir en médecine familiale. (2011)  
25  
26

27  
28 Montréal.  
29  
30  
31  
32  
33  
34  
35

36 10. Bates-Eamer N, JL Ronson. Perceived shortage, relative surplus: the  
37

38  
39 paradox of Quebec's Family physician workforce - An Intra- and  
40  
41

42  
43 Inter-Provincial Comparison, U.o.V. Centre for Global Studies, Editor. 2009.  
44  
45  
46  
47  
48  
49  
50  
51  
52  
53  
54  
55  
56  
57  
58  
59  
60

- 1  
2  
3  
4 11. OCDE, The Organization for Economic Co-operation and Development:  
5  
6  
7 Promoting health, preventing disease, the economic case.  
8  
9  
10  
11 <https://www.oecd-ilibrary.org/docserver/9780335262274->  
12  
13  
14 [en.pdf?expires=1535485524&id=id&accname=guest&checksum=37E5F5C](https://www.oecd-ilibrary.org/docserver/9780335262274-en.pdf?expires=1535485524&id=id&accname=guest&checksum=37E5F5C0D17CCC858CBF41B9E570C708)  
15  
16  
17  
18 0D17CCC858CBF41B9E570C708. In The European Observatory on Health  
19  
20  
21  
22 Systems and Policies Series (2015). Accessed 28 August 2018.  
23  
24  
25  
26  
27  
28  
29  
30  
31  
32 12. Adams SG, Smith PK, Allan PF, Anzueto A, Pugh JA, Cornell JE.  
33  
34  
35  
36 Systematic Review of the Chronic Care Model in Chronic Obstructive  
37  
38  
39  
40 Pulmonary Disease Prevention and Management. Arch Intern Med. 2007;  
41  
42  
43 167:551-61. doi:10.1001/archinte.167.6.551  
44  
45  
46  
47  
48  
49  
50  
51  
52  
53  
54  
55  
56  
57  
58  
59  
60

- 1  
2  
3  
4 13. Longtin Y, Sax H, Leape LL, Sheridan SE, Donaldson L, Pittet D. Patient  
5  
6  
7 participation: current knowledge and applicability to patient safety Mayo Clin  
8  
9  
10  
11 Proc. Elsevier. 2010 January;85:53-62.  
12  
13  
14  
15  
16  
17  
18  
19  
20  
21 14. Hibbard JH, Greene J. What the evidence shows about patient activation:  
22  
23  
24 better health outcomes and care experiences; fewer data on costs. Health  
25  
26  
27  
28 affairs. 2013;32:207-214.  
29  
30  
31  
32  
33  
34  
35  
36  
37  
38 15. Greene J, Hibbard JH. Why does patient activation matter? An examination  
39  
40  
41  
42 of the relationships between patient activation and health-related outcomes.  
43  
44  
45  
46 J Gen Intern Med. 2012; 27:520-6.  
47  
48  
49  
50  
51  
52  
53  
54  
55  
56  
57  
58  
59  
60

- 1  
2  
3  
4 16. Hibbard JH, Mahoney E R, Stock R, Tusler, M. Do increases in patient  
5  
6  
7 activation result in improved self-management behaviors?. Health Services  
8  
9  
10  
11 Research.2007;42:1443-63.  
12  
13  
14  
15  
16  
17  
18  
19  
20  
21 17. Fowles JB, Terry P., Xi M, Hibbard J, Bloom CT, Harvey L. Measuring self-  
22  
23  
24 management of patients' and employees' health: further validation of the  
25  
26  
27 Patient Activation Measure (PAM) based on its relation to employee  
28  
29 characteristics. Patient Educ Couns. 2009;77:116-22  
30  
31  
32  
33  
34  
35  
36  
37  
38  
39  
40  
41  
42 18. Mosen DM, Schmittdiel J, Hibbard J, Sobel D, Remmers C, Bellows J. Is  
43  
44  
45 patient activation associated with outcomes of care for adults with chronic  
46  
47  
48 conditions? J Ambul Care Manage. 2007;30:21.  
49  
50  
51  
52  
53  
54  
55  
56  
57  
58  
59  
60

- 1  
2  
3  
4 19. Becker ER, Roblin D W. Translating primary care practice climate into  
5  
6  
7 patient activation: the role of patient trust in physician. Med care.  
8  
9  
10  
11 2008;**46**:795-805.  
12  
13  
14  
15  
16  
17  
18  
19  
20  
21 20. Hibbard JH, Cunningham PJ. How engaged are consumers in their health  
22  
23  
24 and health care, and why does it matter? Res Briefs. 2008;**8**:1-9.  
25  
26  
27  
28  
29  
30  
31  
32  
33  
34  
35 21. Remmers C, Hibbard J, Mosen DM, Wagenfield M, Hoyer RE, Jones C. Is  
36  
37  
38 patient activation associated with future health outcomes and health-care  
39  
40  
41 utilization among patients with diabetes? J Ambul Care  
42  
43  
44  
45 Manage.2009;**32**:320-7.  
46  
47  
48  
49  
50  
51  
52  
53  
54  
55  
56  
57  
58  
59  
60

- 1  
2  
3  
4 22. Donald M, Ware RS, Ozolins IZ, Begum N, Crowther R, Bain C. The role of  
5  
6  
7 patient activation in frequent attendance at primary care: a population-  
8  
9  
10  
11 based study of people with chronic disease. *Patient Educ Couns*.  
12  
13  
14  
15 2011;**83**:217-21.  
16  
17  
18  
19  
20  
21  
22  
23  
24 23. Greene J, Hibbard JH, Sacks R, Overton V, Parrotta CD. When patient  
25  
26  
27 activation levels change, health outcomes and costs change, too. *Health*  
28  
29  
30  
31  
32 affairs. 2015;**34**:431-7.  
33  
34  
35  
36  
37  
38  
39  
40  
41  
42 24. Holmström I, Röing M. The relation between patient-centeredness and  
43  
44  
45  
46 patient empowerment: a discussion on concepts. *Patient Educ Couns*.  
47  
48  
49  
50 2010; **79**:167-72.  
51  
52  
53  
54  
55  
56  
57  
58  
59  
60

- 1  
2  
3  
4 25. Pomey MP, Flora, L, Karazivan P, Dumez V, Lebel P, Vanier MC., et al. Le  
5  
6  
7 "Montreal model" : enjeux du partenariat relationnel entre patients et  
8  
9  
10  
11 professionnels de la sante. Sante Publique.2015; **HS**:41-50.  
12  
13  
14  
15  
16  
17  
18  
19  
20  
21 26. Kickbusch I, Pelikan J, Apfel F, Tsouros A. Health literacy. World Health  
22  
23  
24 Organisation 2013.  
25  
26  
27  
28 [http://www.euro.who.int/\\_\\_data/assets/pdf\\_file/0008/190655/e96854.pdf](http://www.euro.who.int/__data/assets/pdf_file/0008/190655/e96854.pdf).  
29  
30  
31  
32  
33  
34  
35  
36 27. Hart JT. The Autonomous Patient: Ending Paternalism in Medical  
37  
38  
39  
40 Care.JRSM.2002; **95**:623-4.  
41  
42  
43  
44  
45  
46  
47  
48  
49  
50  
51  
52  
53  
54  
55  
56  
57  
58  
59  
60



- 1  
2  
3  
4 28. Koh H.K, Brach C, Harris LM, Parchman ML. A proposed 'health literate  
5  
6  
7 care model' would constitute a systems approach to improving patients'  
8  
9  
10 engagement in care. Health Affairs.2013;**32**:357-67.  
11  
12  
13  
14  
15  
16  
17  
18  
19  
20  
21 29. Frosch DL, Elwyn G. Don't blame patients, engage them: transforming  
22  
23  
24 health systems to address health literacy. Journal of health  
25  
26  
27 communication.2014;**19**:10-4.  
28  
29  
30  
31  
32  
33  
34  
35  
36 30. Monkman H, Andre W. eHealth literacy issues, constructs, models, and  
37  
38  
39 methods for health information technology design and evaluation.  
40  
41  
42 Knowledge Management & ELearning: An International Journal  
43  
44  
45  
46  
47 (KM&EL).2015;**7**: 541-9.  
48  
49  
50  
51  
52  
53  
54  
55  
56  
57  
58  
59  
60

- 1  
2  
3  
4 31. Chaudhry B, Wang J, Wu S, Maglione M, Mojica W, Roth E, Shekelle PG.  
5  
6  
7 Systematic review: impact of health information technology on quality,  
8  
9  
10  
11 efficiency, and costs of medical care. *Annals of Internal*  
12  
13  
14  
15 *Medicine*.2006;**144**:742-52.  
16  
17  
18  
19  
20  
21  
22 32. Cummings E, Turner P. Patient self-management and chronic illness:  
23  
24  
25  
26 evaluating outcomes and impacts of information technology. *Studies in*  
27  
28  
29  
30 *health technology and informatics*.2008;**143**:229-34.  
31  
32  
33  
34  
35  
36  
37  
38  
39  
40 33. Dorr D, Bonner LM, Cohen, AN, Shoai, RS, Perrin R, Chaney E, Young AS.  
41  
42  
43  
44 Informatics systems to promote improved care for chronic illness: a  
45  
46  
47  
48 literature review. *JAMIA*. 2007;**14**:156-63.  
49  
50  
51  
52  
53  
54  
55  
56  
57  
58  
59  
60

- 1  
2  
3  
4 34. Häyrinen K, Saranto K, Nykänen P. Definition, structure, content, use and  
5  
6  
7 impacts of electronic health records: a review of the research literature. Int J  
8  
9  
10  
11 Med Inform. 2008;**77**:291-304.  
12  
13  
14  
15  
16  
17  
18  
19  
20  
21 35. Lau F, Kuziemyky C, Price M, Gardner JA. Review on systematic reviews  
22  
23  
24 of health information system studies. JAMIA. 2010;**17**:637-45.  
25  
26  
27  
28  
29  
30  
31  
32  
33  
34 36. Rigby M, Georgiou A, Hyppönen H, Ammenwerth E, de Keizer N, Magrabi  
35  
36  
37  
38 F, Scott P. Patient Portals as a Means of Information and Communication  
39  
40  
41  
42 Technology Support to Patient-Centric Care Coordination – the Missing  
43  
44  
45  
46 Evidence and the Challenges of Evaluation. Yearbook of Medical  
47  
48  
49 Informatics 2015;**10**:148-59.  
50  
51  
52  
53  
54  
55  
56  
57  
58  
59  
60

- 1  
2  
3  
4 37. Eland-de Kok, Pvan Os-Medendorp H, Vergouwe-Meijer A,  
5  
6  
7 Bruijnzeel-Koomen C, Ros W. A systematic review of the effects of e-health  
8  
9  
10  
11 on chronically ill patients. J ClinNurs, 2011;**20**:2997-3010.  
12  
13  
14  
15  
16  
17  
18  
19  
20  
21 38. Irizarry T, Dabbs AD, Curran CR. Patient portals and patient engagement:  
22  
23  
24 a state of the science review. JMIR. 2015;**17**.  
25  
26  
27  
28  
29  
30  
31  
32  
33  
34 39. Price M, Bellwood P, Kitson N, Davies I, Weber J, Lau F. Conditions  
35  
36  
37  
38 potentially sensitive to a personal health record (PHR) intervention, a  
39  
40  
41  
42 systematic review. BMC Med Inform Decis Mak. 2015;**15**:32.  
43  
44  
45  
46  
47  
48  
49  
50  
51  
52  
53  
54  
55  
56  
57  
58  
59  
60

- 1  
2  
3  
4 40. Ross J, Stevenson F, Lau R, Murray E. Factors that influence the  
5  
6  
7 implementation of e-health: a systematic review of systematic reviews (an  
8  
9  
10  
11 update). *Implementation Science*. 2016;**11**:146.  
12  
13  
14  
15  
16  
17  
18  
19  
20  
21 41. Strisland F, Svagård ., Austad H, Reitan J. Meeting end user needs in  
22  
23  
24 international research projects aiming to develop medical device technology  
25  
26  
27  
28 prototypes for integrated care: A case study. *Int J Integr Care* 2016;**16**.  
29  
30  
31  
32  
33  
34  
35  
36  
37  
38 42. Monkman H, KUSHNIRUIC A. Applying usability methods to identify health  
39  
40  
41  
42 literacy issues: an example using a Personal Health Record. *Stud Health*  
43  
44  
45  
46 *Technol Inform*. 2013; 183:179-85.  
47  
48  
49  
50  
51  
52  
53  
54  
55  
56  
57  
58  
59  
60

- 1  
2  
3  
4 43. Research2Guidance. mHealth App Developer Economics: The current  
5  
6  
7 status and trends of the mHealth app market, 2017.  
8

9  
10  
11 [https://www.uzelf.org/wp-content/uploads/2017/12/R2G-mHealth-  
12  
13  
14  
15 Developer-Economics-2017-Status-And-Trends.pdf](https://www.uzelf.org/wp-content/uploads/2017/12/R2G-mHealth-Developer-Economics-2017-Status-And-Trends.pdf)  
16  
17

- 18  
19  
20  
21  
22  
23  
24 44. Greenhalgh T, Hinder S, Stramer K, Bratan T, Russell J. Adoption, non-  
25  
26  
27 adoption, and abandonment of a personal electronic health record: case  
28  
29  
30  
31  
32 study of HealthSpace. *BMJ*. 2010;**341**:c5814.  
33  
34

- 35  
36  
37  
38  
39  
40  
41  
42 45. Garabedian, LF, Ross-Degnan, D, Wharam JF. Mobile phone and  
43  
44  
45  
46 smartphone technologies for diabetes care and self-management. *Current*  
47  
48  
49  
50 diabetes reports. 2015;**15**:109.  
51  
52  
53  
54  
55  
56  
57  
58  
59  
60

- 1  
2  
3  
4 46. Group N. Catalyst Insights Council Monthly Report: How to Hardwire Patient  
5  
6  
7 Engagement into Care Delivery Processes, 2017.  
8

9  
10  
11 <https://join.catalyst.nejm.org/hubfs/Insights%20Council%20Monthly%20->

12  
13  
14 %20Files/Insights%20Council%20Monthly%20May%202017%20Report\_Ho

15  
16  
17 w%20to%20Hardwire%20Patient%20Engagement%20into%20Care%20Del

18  
19  
20  
21  
22 ivery%20Processes.pdf.  
23  
24  
25  
26  
27  
28  
29

- 30 47. Khoja S, Durrani H, Scott RE, Sajwani A, Piryani U. Conceptual framework  
31  
32  
33 for development of comprehensive e-health evaluation tool. *Telemedicine*  
34  
35  
36 and e-Health. 2013;**19**:48-53.  
37  
38  
39  
40  
41  
42  
43  
44  
45  
46

- 47 48. Lawani MA, Valéra B, Fortier-Brochu É, Légaré F, Carmichael PH, Côté L,  
48  
49  
50  
51 Giguere AM. Five shared decision-making tools in 5 months: use of rapid  
52  
53  
54  
55  
56  
57  
58  
59  
60

1  
2  
3 reviews to develop decision boxes for seniors living with dementia and their  
4  
5  
6  
7 caregivers. *Systematic reviews*. 2017;**6**:56.  
8  
9

- 10  
11  
12  
13  
14  
15  
16  
17 49. Zanaboni P, Ngangue P, Mbemba GIC, Schopf TR, Bergmo TS, Gagnon M  
18  
19  
20  
21 P. Methods to Evaluate the Effects of Internet-Based Digital Health  
22  
23  
24 Interventions for Citizens: Systematic Review of Reviews. *JMIR*.  
25  
26  
27  
28 2018;**20**e10202.  
29  
30

- 31  
32  
33  
34  
35  
36  
37  
38 50. Giguere AM, Labrecque M, Haynes RB, Grad R, Pluye P, Légaré F, et al.  
39  
40  
41  
42 Evidence summaries (decision boxes) to prepare clinicians for shared  
43  
44  
45  
46 decision-making with patients: a mixed methods implementation study.  
47  
48  
49  
50 Implement Sci.2014;**9**:144.  
51  
52  
53  
54  
55  
56  
57  
58  
59  
60



1  
2  
3 51. Lemieux V. Pour qu'on se comprenne: guide de littérature en santé, 2014.

4  
5  
6  
7 [https://publications.santemontreal.qc.ca/uploads/tx\\_asssmpublications/litter](https://publications.santemontreal.qc.ca/uploads/tx_asssmpublications/litter)  
8  
9  
10  
11 [atie\\_v9.pdf](#).

12  
13  
14  
15  
16  
17  
18 52. Hibbard JH, Mahoney ER, Stockard J, Tusler M. Development and testing  
19  
20  
21  
22 of a short form of the patient activation measure. Health Services  
23  
24  
25  
26 Research.2005;40:1918-30.

27  
28  
29  
30  
31  
32  
33  
34  
35  
36 53. Health I. Patient Activation Measure, 2014. <http://www.insigniahealth.com/>

37  
38  
39  
40  
41  
42  
43 54. Glasgow RE, Wagner EH, Schaefer J, Mahoney LD, Reid RJ, Greene SM.  
44  
45  
46  
47 Development and validation of the patient assessment of chronic illness  
48  
49  
50  
51 care (PACIC). Medical care. 2005:436-44.

- 1  
2  
3  
4  
5  
6  
7  
8  
9 55. Davis FD. Perceived usefulness, perceived ease of use, and user  
10  
11  
12 acceptance of information technology. MIS quarterly.1989:319-40.  
13  
14  
15  
16  
17  
18  
19  
20  
21  
22 56. Solomon M, Wagner SL, Goes J. Effects of a Web-based intervention for  
23  
24  
25 adults with chronic conditions on patient activation: online randomized  
26  
27  
28  
29 controlled trial. JMIR. 2012;**14**:e32.  
30  
31  
32  
33  
34  
35  
36  
37  
38  
39 57. Hendriks M, Rademakers J. Relationships between patient activation,  
40  
41  
42  
43 disease-specific knowledge and health outcomes among people with  
44  
45  
46  
47 diabetes; a survey study. BMC health serv res. 2014;**14**:393.  
48  
49  
50  
51  
52  
53  
54  
55  
56  
57  
58  
59  
60

1  
2  
3 58. Ghandour E, Gagnon M-P, Fortin J-P. Patient adoption of a connected  
4  
5  
6  
7 electronic personal health record to support chronic disease management in  
8  
9  
10  
11 primary care in Quebec. Submitted for publication.  
12  
13

14  
15  
16  
17  
18  
19  
20  
21 59. Ghandour E, Gagnon M-P, Fortin J-P. Conditions d'adoption du dossier de  
22  
23  
24 santé électronique personnel par les professionnels de la première ligne au  
25  
26  
27  
28 Québec : Perspectives professionnelle et organisationnelle. Revue Santé  
29  
30  
31 Publique. 2017; 29:837-850.  
32  
33  
34

35  
36  
37  
38  
39  
40 60. World Health Organization. Beginning with the end in mind planning pilot  
41  
42  
43 projects and other programmatic research for successful scaling up, 2014.  
44  
45  
46  
47 [http://apps.who.int/iris/bitstream/handle/10665/44708/9789241502320\\_eng.](http://apps.who.int/iris/bitstream/handle/10665/44708/9789241502320_eng.pdf)  
48  
49  
50  
51 [pdf.](http://apps.who.int/iris/bitstream/handle/10665/44708/9789241502320_eng.pdf)  
52  
53  
54  
55  
56  
57  
58  
59  
60

- 1  
2  
3  
4 61. Aronson J. A pragmatic view of thematic analysis. Qualitative  
5  
6  
7 Report.1994;2:1-3  
8  
9  
10  
11  
12  
13  
14  
15  
16  
17 62. Miles MB, Huberman AM. Qualitative data analysis: An Expanded  
18  
19  
20 Sourcebook. Sage. 2003.  
21  
22  
23  
24  
25  
26  
27  
28  
29  
30  
31 63. Parry D, Salsberg J, Macaulay AC, et al. A Guide to Researcher and  
32  
33  
34 Knowledge-User Collaboration in Health Research. C.I.o.H.R. (CIHR)  
35  
36  
37 Editor. 2009:83.  
38  
39  
40  
41  
42  
43  
44  
45  
46  
47  
48 64. Baumbusch JL, Kirkham SR, Khan KB, McDonald H, Semeniuk P, Tan E,  
49  
50  
51  
52 Anderson JM. Pursuing common agendas: a collaborative model for  
53  
54  
55  
56  
57  
58  
59  
60

1  
2  
3 knowledge translation between research and practice in clinical settings.  
4  
5  
6

7 Res Nurs Health. 2008; 31:130-40.  
8  
9  
10

## 11 Footnotes

12  
13  
14  
15  
16  
17

18 **Protocol version:** Version 1 (November 15<sup>th</sup> 2018)  
19  
20  
21

22 **Funding:** This study is funded by Canadian Institutes of Health Research.  
23  
24  
25

26 **Funding Reference Number:** PCG-155469 (see **Supplementary File 10**).  
27  
28  
29

30 **Authors' contributions:** MPG, AL, GC, and CC conceived and designed the study  
31  
32  
33

34 and drafted the manuscript. AG, JPF, FL, HW, ALB, RB, CS, AM, SRA, CD, EK,  
35  
36  
37

38 FLP, JR, MAN participated in designing the study and revised the manuscript. All  
39  
40  
41

42 authors read and approved the final manuscript.  
43  
44  
45

46 **Competing interest:** The authors declare that they have no competing interests.  
47  
48  
49  
50  
51  
52  
53  
54  
55  
56  
57  
58  
59  
60

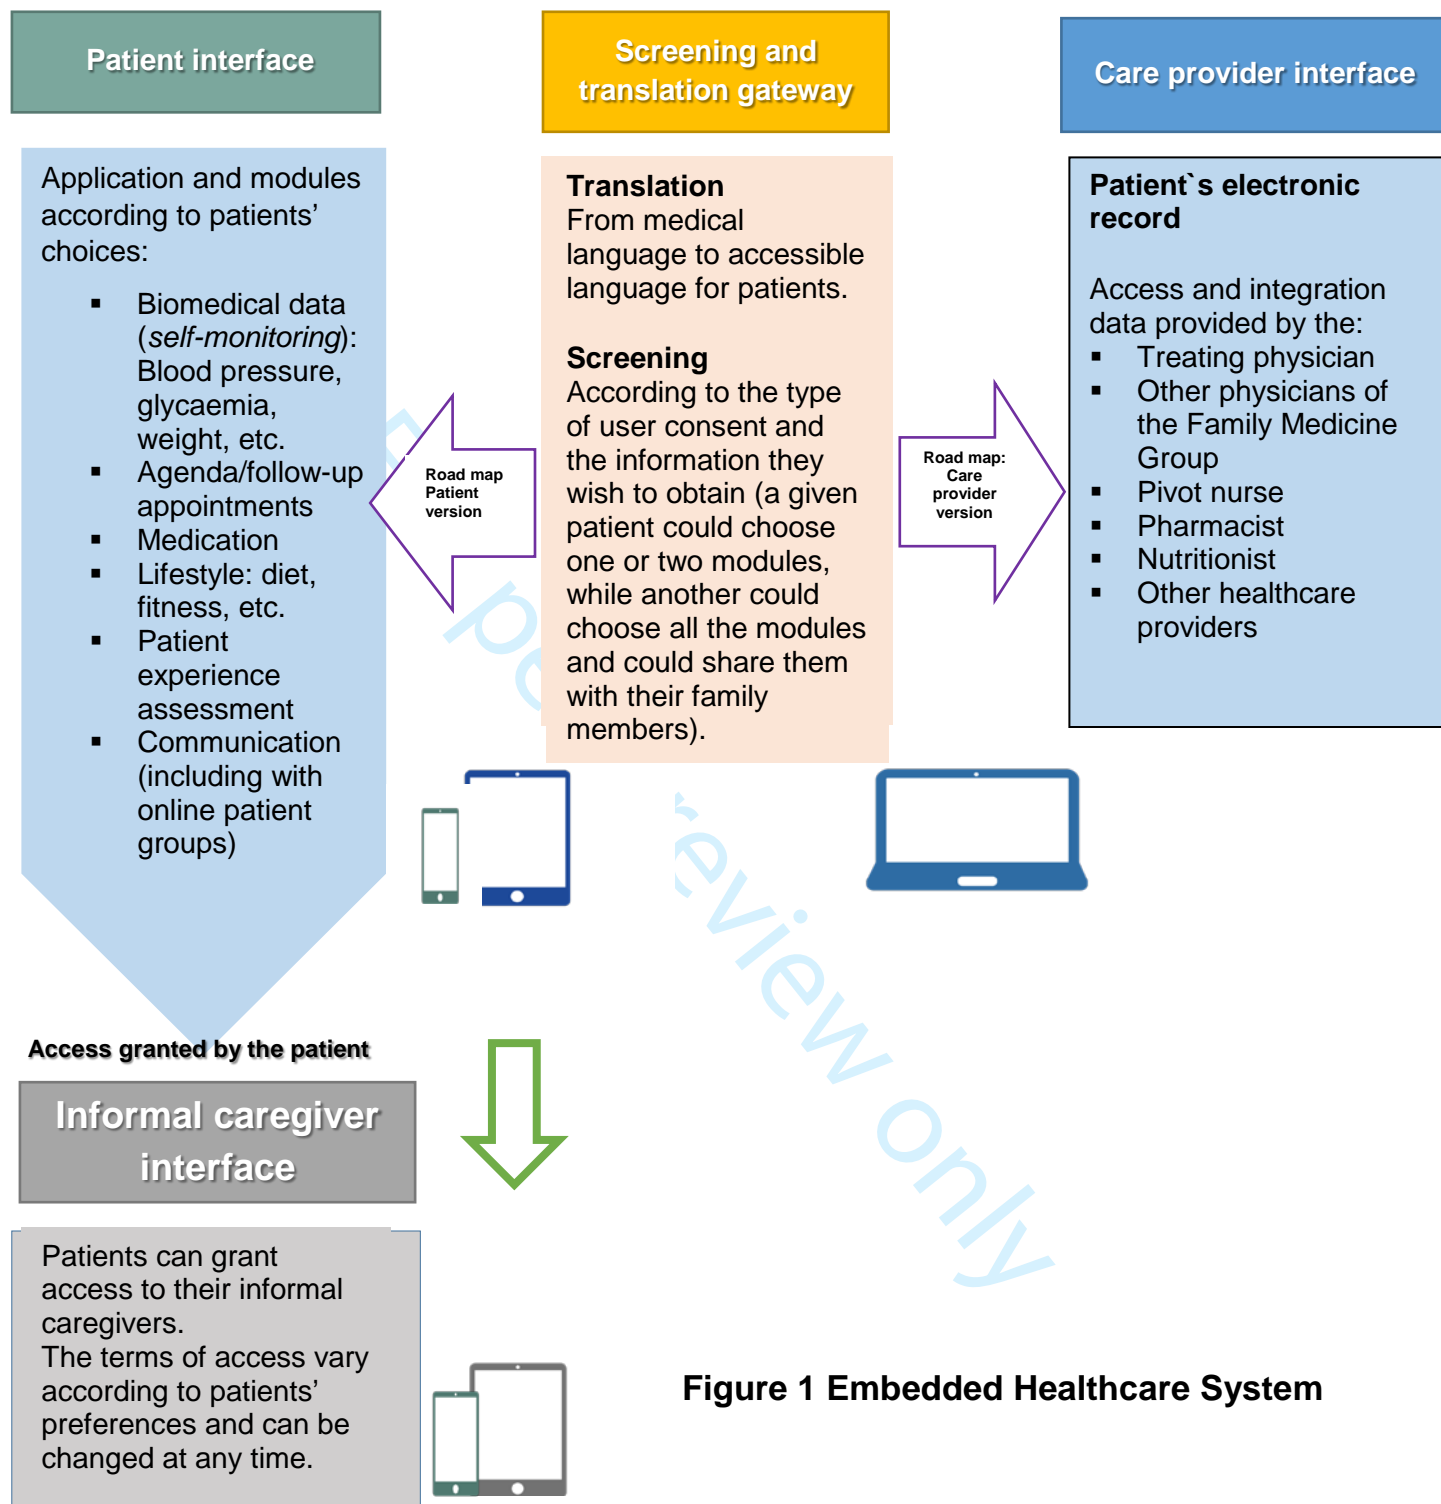

**Figure 1 Embedded Healthcare System**

## Phase 1

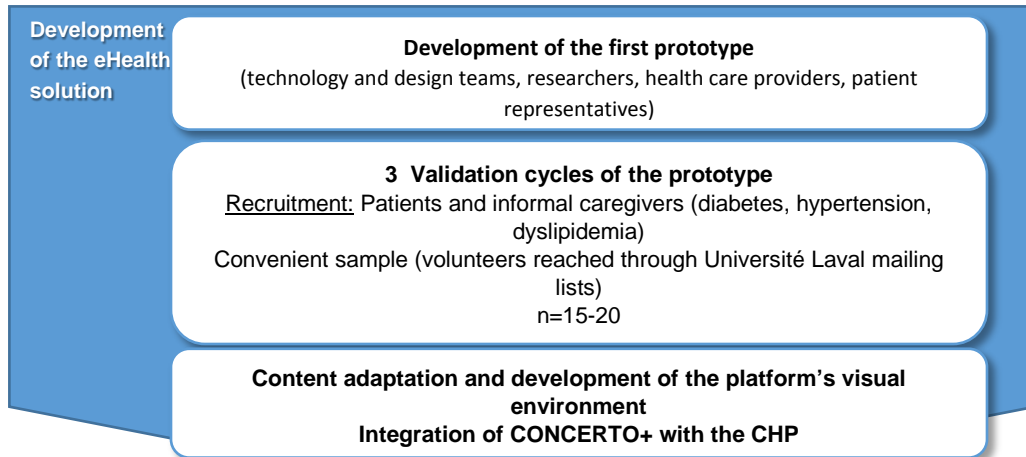

## Phase 2

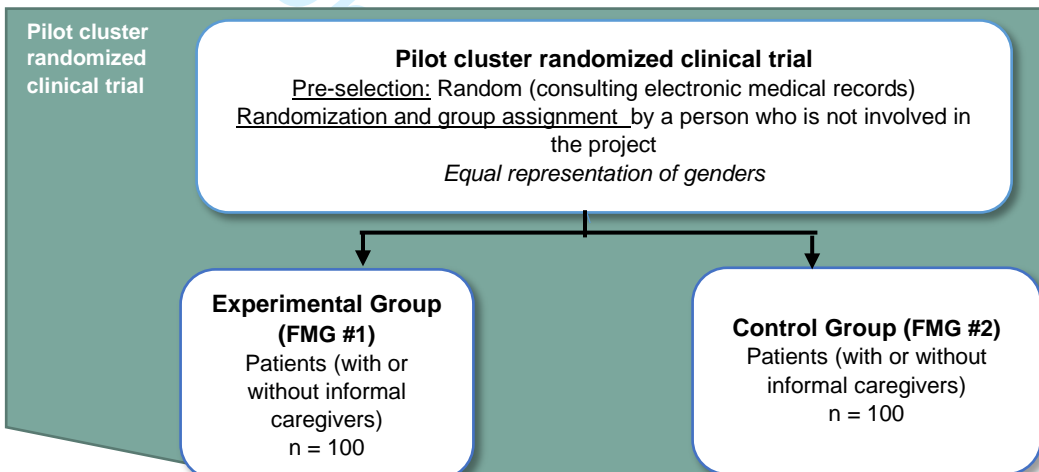

## Phase 3

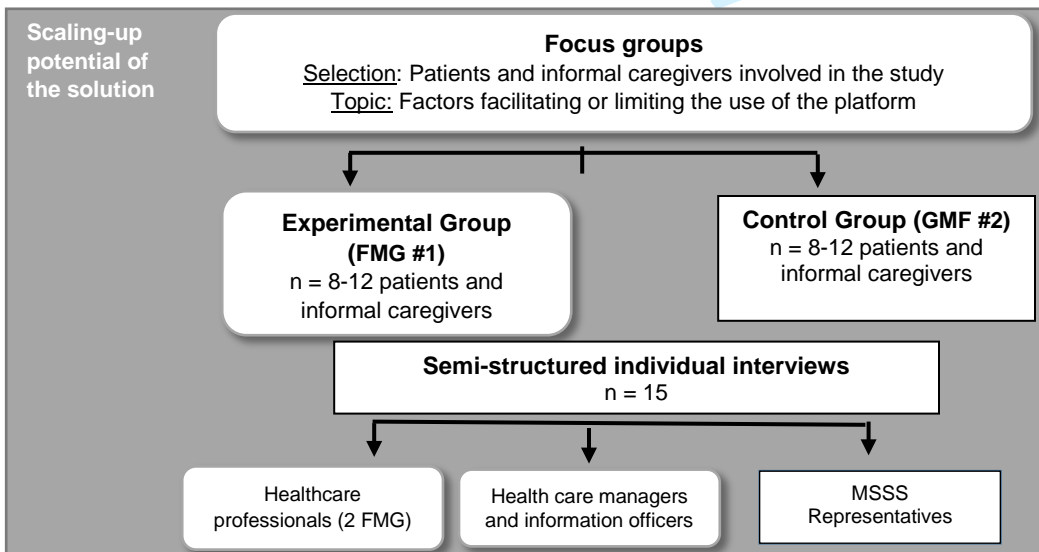

Figure 2 Recruitment flowchart

1  
2  
3  
4  
5  
6  
7  
8  
9  
10  
11  
12  
13  
14  
15  
16  
17  
18  
19  
20  
21  
22  
23  
24  
25  
26  
27  
28  
29  
30  
31  
32  
33  
34  
35  
36  
37  
38  
39  
40  
41  
42  
43  
44  
45  
46  
47  
48  
49  
50  
51  
52

**Supplementary File 1: Outcome measures and items (original English version)**

| 1. Patient Activation                                                                                                                                                                                                                                                                                                                                                                                                                                                                                                                                                                                                                                                                                                                                                                                                                                                                                                                                                                                                                                                                                                                                                                                                                                                                                    |
|----------------------------------------------------------------------------------------------------------------------------------------------------------------------------------------------------------------------------------------------------------------------------------------------------------------------------------------------------------------------------------------------------------------------------------------------------------------------------------------------------------------------------------------------------------------------------------------------------------------------------------------------------------------------------------------------------------------------------------------------------------------------------------------------------------------------------------------------------------------------------------------------------------------------------------------------------------------------------------------------------------------------------------------------------------------------------------------------------------------------------------------------------------------------------------------------------------------------------------------------------------------------------------------------------------|
| <b>Tool used</b>                                                                                                                                                                                                                                                                                                                                                                                                                                                                                                                                                                                                                                                                                                                                                                                                                                                                                                                                                                                                                                                                                                                                                                                                                                                                                         |
| <i>Patient Activation Measure-PAM-13</i>                                                                                                                                                                                                                                                                                                                                                                                                                                                                                                                                                                                                                                                                                                                                                                                                                                                                                                                                                                                                                                                                                                                                                                                                                                                                 |
| <b>Criteria<sup>1</sup></b>                                                                                                                                                                                                                                                                                                                                                                                                                                                                                                                                                                                                                                                                                                                                                                                                                                                                                                                                                                                                                                                                                                                                                                                                                                                                              |
| 1. When all is said and done, I am the person who is responsible for managing my health condition.<br>2. Taking an active role in my own healthcare is the most important factor in determining my health and ability to function.<br>3. I am confident that I can take actions that will help prevent or minimize some symptoms or problems associated with my health condition.<br>4. I know what each of my prescribed medications does.<br>5. I am confident I can tell when I need to go get medical care and when I can handle a health problem.<br>6. I am confident I can tell my health provider the concerns I have even when he or she does not ask.<br>7. I am confident I can follow through on the medical treatment I need to do at home.<br>8. I understand the nature and causes of my health condition.<br>9. I know the different medical treatment options available for my health condition.<br>10. I have been able to maintain the lifestyle changes I have made for my health.<br>11. I know how to prevent further problems with my health condition.<br>12. I am confident I can find a solution when new situations or problems arise with my health condition.<br>13. I am confident I can maintain lifestyles changes, like diet and exercise, even during times of stress. |
| <b>Results measurement</b>                                                                                                                                                                                                                                                                                                                                                                                                                                                                                                                                                                                                                                                                                                                                                                                                                                                                                                                                                                                                                                                                                                                                                                                                                                                                               |
| <b>Scoring</b> (for each criteria): <ul style="list-style-type: none"> <li>▪ Strongly disagree = 1</li> <li>▪ Disagree = 2</li> <li>▪ Agree = 3</li> <li>▪ Strongly agree = 4</li> </ul>                                                                                                                                                                                                                                                                                                                                                                                                                                                                                                                                                                                                                                                                                                                                                                                                                                                                                                                                                                                                                                                                                                                 |
| <b>Activation level</b> (converted into a score of 100): <ol style="list-style-type: none"> <li>1. Not believing that activation is important (<math>\leq 47</math>)</li> <li>2. Lack of knowledge or confidence to take action (47.1-55.1)</li> <li>3. Beginning to take action (55.2-67)</li> <li>4. Taking action (<math>\geq 67.1</math>)</li> </ol>                                                                                                                                                                                                                                                                                                                                                                                                                                                                                                                                                                                                                                                                                                                                                                                                                                                                                                                                                 |

53  
54  
55  
56  
57  
58  
59  
60

<sup>1</sup> Adapted from: Moljord I E O, Lara-Cabrera ML. Perestelo-Pérez L, Rivero-Santana A, Eriksen L, Linaker OM. Psychometric properties of Patient Activation Measure-13 among out-patients waiting for mental health treatment: a validation study in Norway. *Patient education and counseling*. 2015;98(11):1410-1417.



## 2. Impacts of the use of CONCERTO+

### Tool used

Survey used for the assessment of the CHP pilot

### Criteria<sup>1</sup>

#### Problem-solving/Advice

1. Have you been asked how your illness affects your life?
2. Have you been helped in planning ahead to take care of your illness even in hard times?
3. Did your care providers ask about your values and traditions when they recommended treatment?
4. Have you been helped in drawing up a treatment plan that you could follow in your daily life?

#### Delivery system design/Decision support

1. Have you been asked about your health habits?
2. Have you been encouraged to go to a specific group or class to help you cope with your chronic illness?
3. Have you been given a copy of your treatment plan?

#### Goal-setting/Tailoring

1. Have you been asked to talk about your goals in the context of receiving care for your chronic condition?
2. Have you been helped in setting specific goals to improve your diet or fitness?
3. Have you been given a written list of things you should do to improve your health?
4. Have you been shown how taking proper care of your illness influenced your condition?
5. Are you satisfied that your care was well organized?

#### Follow-up/Coordination

1. Have you been referred to a dietitian, health educator, or counselor?
2. Have you been told how your visits with other doctors were going?
3. Have you been told how your visits with other types of doctors, such as a specialist or a surgeon, helped in your treatment?
4. Have you been asked how your visits with other doctors were going?
5. Have you been contacted after a visit to see how things were going?

#### Overall care<sup>2</sup>

Since you began using CONCERTO+

1. Have you had an appointment with a professional from the clinic?
2. Have you received help when you were in need?
3. Have you had a follow-up appointment for your health condition?
4. Have you been helped through contact with a professional from the team or by receiving an answer from one of the team members after a phone call?
5. Have you had the feeling that your nurse coordinates all of your care?
6. Have you had the feeling that your health problems are being taken into account by the Program team?
7. Have you noticed that your visits with other health professionals are being taken into account by the Program team?
8. Have you been helped in understanding your test results (e.g. laboratory test, pressure tap, etc.)?
9. Have you received an answer in emergency situations?

<sup>1</sup> These criteria were originally developed and validated by Glasgow RE, Wagner EW, Schaefer J, Mahoney LD, Reid RJ, Greene SM. 2005. Development and validation of the patient assessment of chronic illness care (PACIC). *Medical Care*. 43, 5: 436–444.

<sup>2</sup> Adapted from McIntosh, CN. Examen de la validité factorielle de certains modules de l'Enquête canadienne sur l'expérience des soins de santé primaires. Statistique Canada, Division de l'information et de la recherche sur la santé. July 2008.

### 3. Acceptance of CONCERTO+

#### Tool used

Survey based on the *Technology Acceptance Model*

#### Criteria

##### Perceived ease of use

1. My interaction with CONCERTO+ is clearer and more comprehensive.
2. I find it is easy to get CONCERTO+ to do what I want it to do.
3. The use of CONCERTO+ will improve my follow-up.
4. The use of CONCERTO+ will improve the effectiveness of my care.

##### Perceived usefulness

1. The use of CONCERTO+ will improve my health condition.
2. I find CONCERTO+ to be a useful tool for the follow-up of my health condition.
3. The use of CONCERTO+ is interesting.
4. I like to use a smart phone or a tablet to look for health information.
5. I'm eager to use technology to manage my health condition.

##### Behavioural intention to use

1. I'm going to use CONCERTO+ in the future.
2. Using CONCERTO+ is part of my plan.

### 4. The use of CONCERTO+

#### Tool used

CONCERTO+ logs use

#### Criteria

*Logs*

**Supplementary File 2:** ExpandNet recommendations for scaling up (WHO, 2013) Original English version

1. Engage in a participatory process involving key stakeholders.
2. Ensure the relevance of the proposed innovation.
3. Reach a consensus on expectations for scale up.
4. Tailor the innovation to the socio-cultural and institutional settings.
5. Keep the innovation as simple as possible.
6. Test the innovation in the variety of socio-cultural and institutional settings where it will be scaled up.
7. Test the innovation under routine operating conditions and existing resource constraints of the health system.
8. Develop plans to assess and document the process of implementation.
9. Advocate with donors and other sources of funding for financial support beyond the pilot stage.
10. Prepare to advocate for necessary changes in policies, regulations, and other health systems components.
11. Develop plans for how to promote learning and disseminate information.
12. Plan on being cautious about initiating scale up before the required evidence is available.

**Supplementary File 3:** Mesure d'activation du patient (PAM-13) French translation

| <b>1. Activation du patient</b>                                                       |                                                                                                                                                             |
|---------------------------------------------------------------------------------------|-------------------------------------------------------------------------------------------------------------------------------------------------------------|
| <b>Outil utilisé</b>                                                                  |                                                                                                                                                             |
| Mesure d'activation du patient ( <i>Patient Activation Measure-PAM-13</i> )           |                                                                                                                                                             |
| <b>Critères <sup>1</sup></b>                                                          |                                                                                                                                                             |
| 1.                                                                                    | En fin de compte, je suis la personne qui est responsable de gérer ma condition de santé                                                                    |
| 2.                                                                                    | Prendre un rôle actif dans mes soins de santé et le facteur le plus important pour déterminer ma santé et mon habileté pour fonctionner                     |
| 3.                                                                                    | Je suis confiant que je peux prendre des actions qui m'aideront à prévenir ou minimiser certains symptômes ou problèmes associés avec ma condition de santé |
| 4.                                                                                    | Je sais quels sont les effets de tous mes médicaments prescrits                                                                                             |
| 5.                                                                                    | Je suis persuadé que je peux savoir quand j'ai besoin de soins médicaux et quand je peux gérer mes problèmes de santé par moi-même                          |
| 6.                                                                                    | Je suis persuadé que je peux exprimer à mon professionnel de la santé mes préoccupations même quand il ou elle ne le demande pas                            |
| 7.                                                                                    | Je suis convaincu que je peux appliquer les traitements médicaux dont j'ai besoin à la maison                                                               |
| 8.                                                                                    | Je comprends la nature et les causes de ma condition de santé                                                                                               |
| 9.                                                                                    | Je connais les différentes options de traitements médicaux qui sont disponibles pour ma condition de santé                                                  |
| 10.                                                                                   | J'ai été capable de maintenir des changements de style de vie que j'ai adopté pour ma santé                                                                 |
| 11.                                                                                   | Je sais comment prévenir des problèmes ultérieurs en lien avec ma condition de santé                                                                        |
| 12.                                                                                   | Je suis confiant que je peux trouver des solutions quand des nouvelles situations ou problèmes apparaissent en lien avec ma condition de santé              |
| 13.                                                                                   | Je suis persuadé que je peux maintenant des changements de style de vie comme une diète et de l'exercice même durant des périodes de stress                 |
| <b>Mesure des résultats</b>                                                           |                                                                                                                                                             |
| <b>Notation</b> (pour chaque critère) :                                               |                                                                                                                                                             |
| ▪                                                                                     | Fortement en désaccord (1 point)                                                                                                                            |
| ▪                                                                                     | En désaccord (2 points)                                                                                                                                     |
| ▪                                                                                     | En accord (3 points)                                                                                                                                        |
| ▪                                                                                     | Fortement en accord (4 points)                                                                                                                              |
| <b>Niveaux d'activation</b> (selon la conversion des résultats sur un score de 100) : |                                                                                                                                                             |
| 1.                                                                                    | Ne croit pas que l'activation est important ( $\leq 47$ )                                                                                                   |
| 2.                                                                                    | Manque de savoir ou de confiance pour agir (47.1-55.1)                                                                                                      |
| 3.                                                                                    | Commence à agir (55.2-67)                                                                                                                                   |
| 4.                                                                                    | Agit ( $\geq 67.1$ )                                                                                                                                        |

<sup>1</sup> Adapté de: Moljord I E O, Lara-Cabrera ML, Perestelo-Pérez L, Rivero-Santana A, Eriksen L, Linaker OM. Psychometric properties of Patient Activation Measure-13 among out-patients waiting for mental health treatment: a validation study in Norway. *Patient education and counseling*. 2015;98(11):1410-1417.

Traduction libre

## 2. Impacts de l'utilisation de CONCERTO+

### Outil utilisé

Questionnaire utilisé lors de l'évaluation de la phase pilote du Programme de santé Concerto <sup>1</sup>

### Critères <sup>2</sup>

#### Résolution de problèmes/conseils :

1. Vous a-t-on demandé quels étaient les effets de votre maladie sur votre vie ?
2. Vous a-t-on aidé à planifier afin de pouvoir prendre soin de votre état de santé même en des moments difficiles ?
3. Vos fournisseurs de soins tenaient-ils compte de vos valeurs et de vos traditions au moment de vous recommander un traitement ?
4. Vous a-t-on aidé à élaborer un plan de traitement que vous pourriez mettre en pratique dans votre vie quotidienne ?

#### Prestation de soins/aide à la décision :

1. Vous a-t-on posé des questions sur vos habitudes de santé ?
2. Vous a-t-on encouragé à faire partie d'un groupe ou d'une classe, comme une session d'information éducative, pour vous aider à vivre avec votre état de santé chronique ?
3. Vous a-t-on remis une copie de votre plan de traitement ?

#### Établissement des objectifs/personnalisation :

1. Vous a-t-on demandé de parler de vos objectifs en ce qui concerne la manière de prendre soin de votre condition chronique ?
2. Vous a-t-on aidé à fixer des objectifs spécifiques pour améliorer votre alimentation ou votre activité physique ?
3. Vous a-t-on montré comment ce que vous avez fait pour prendre soins de vous-même a influencé votre condition chronique ?
4. Vous a-t-on remis une liste écrite des choses que vous devriez faire pour améliorer votre santé ?
5. Étiez-vous satisfait de la manière dont vos soins étaient organisés ?

#### Coordination des soins :

1. Vous a-t-on dirigé vers un diététiste, un éducateur en matière de santé ou un conseiller ?
2. Vous a-t-on dit comment vos visites chez d'autres genres de médecins (p. ex., spécialiste, chirurgien) contribuaient à votre traitement ?
3. Vous a-t-on demandé comment se passaient vos visites chez les autres médecins ?
4. A-t-on communiqué avec vous après une visite pour savoir comment les choses se passaient ?

#### Globalité des soins :

Depuis que vous utilisez CONCERTO+, avez-vous...

1. Pu obtenir un rendez-vous avec un professionnel de la clinique ?
2. Été aidé(e) lorsque vous en aviez besoin ?
3. Obtenue un rendez-vous de suivi de votre condition de santé ?
4. Eu besoin d'entrer en contact avec un professionnel de l'équipe ou reçu une réponse de l'un d'entre eux à la suite de votre appel téléphonique ?
5. L'impression que votre infirmière coordonne l'ensemble de vos soins ?

<sup>1</sup> Adapté de : McIntosh, CN. Examen de la validité factorielle de certains modules de l'Enquête canadienne sur l'expérience des soins de santé primaires. Statistique Canada, Division de l'information et de la recherche sur la santé. Juillet 2008.

<sup>2</sup> Ces critères ont été développés initialement et validés par Glasgow et collaborateurs : Glasgow RE, Wagner EW, Schaefer J, MahoneyLD, Reid RJ, Greene SM. 2005. Development and validation of the patient assessment of chronic illness care (PACIC). Medical Care. 43, 5: 436-444.

6. Le sentiment que l'équipe du Programme a tenu compte de votre problème de santé ?
7. Pu constater que l'on a tenu compte de vos consultations avec d'autres professionnels de la santé que ceux de l'équipe du Programme ?
8. Pu vous faire aider à comprendre vos résultats de tests (par exemple : test de laboratoire, prise de pression, etc.) ?
9. Obtenue une réponse lors d'une situation urgente pour vous ?

### 3. Acceptation de CONCERTO+

#### Outils utilisé

Questionnaire basé sur le Modèle d'acceptation de la technologie

#### Critères

##### Facilité d'utilisation perçue :

1. Mon interaction avec le système CONCERTO+ est claire et compréhensible
2. Je trouve qu'il est facile de demander au système CONCERTO+ de faire ce que je veux
3. L'utilisation de CONCERTO+ améliorera mon suivi
4. L'utilisation de CONCERTO+ améliorera mon efficacité à me prendre en charge

##### Utilité perçue :

1. L'utilisation de CONCERTO+ améliorera mon état de santé
2. Je trouve que CONCERTO+ est un outil utile pour le suivi de mon état de santé
3. L'utilisation de CONCERTO+ plus intéressant.
4. J'aime travailler avec l'ordinateur.
5. Je cherche des aspects de mon métier qui demande d'utiliser l'ordinateur

##### Intention comportementale d'utiliser :

1. Je vais utiliser CONCERTO+ dans le futur.
2. J'établis un plan pour utiliser CONCERTO+

### 4. Utilisation de CONCERTO+

#### Outil utilisé

Registres d'utilisation de CONCERTO+

#### Critères

Registres (*Logs*)

**Supplementary File 4:**Recommandations d'ExpandNet pour le passage à l'échelle (OMS, 2013) (French translation)

1. Engager un processus participatif impliquant les principales parties prenantes
2. Assurer la pertinence de l'innovation proposée
3. Trouver un consensus sur les attentes à propos du passage à grande échelle
4. Ajuster l'innovation aux cadres socioculturels et institutionnels
5. Garder l'innovation aussi simple que possible
6. Tester l'innovation dans la variété de cadres socioculturels et institutionnels où elle passera à grande échelle
7. Tester l'innovation dans les conditions de fonctionnement de routine et sous les contraintes de ressource actuelles du système de santé
8. Planifier l'évaluation et la documentation du processus de mise en œuvre
9. Plaider auprès des bailleurs de fonds et autres sources de financement pour un soutien financier au-delà de la phase pilote
10. Se préparer à plaider pour des changements nécessaires dans les politiques, règlements et autres composantes des systèmes de santé
11. Planifier la façon de promouvoir l'apprentissage et la diffusion de l'information
12. Se préparer à la prudence quant au lancement du passage à grande échelle avant l'obtention des preuves requises

**Supplementary File 5: Ethical and funding approval (English translation)****ETHICS APPROVAL**

Research project involving human beings or the consultation of personal information

This research project is reviewed in accordance with the ethical procedures management of research with human beings of Université Laval **by the sectorial committee of research ethics in health science**

|                                 |                                                                                                                  |
|---------------------------------|------------------------------------------------------------------------------------------------------------------|
| <b>Project title</b>            | Personalize concerto: Patient usability experience optimized for embedded, coordinated, and efficient healthcare |
| <b>Researcher's name</b>        | Marie-Pierre Gagnon                                                                                              |
| <b>Approval number</b>          | 2018-067 / 01-06-2018                                                                                            |
| <b>Decision date</b>            | June 1, 2018                                                                                                     |
| <b>Approval expiration date</b> | July 1, 2019                                                                                                     |

After reviewing the information and documents it has been provided, the committee notes that the project respects ethical principles of research with human beings. It takes note of the written confirmation of the researcher that she is aware of the follow-up actions<sup>1</sup> associated with ethical approval of this project and that she has agreed to apply them. Therefore, the committee approves this project for one year.

June 6, 2018

\_\_\_\_\_  
Mahmoud Rouabhia, Chair of the  
Research Ethics Committee in  
Health Sciences

<sup>1</sup> Follow-up action reminder on the next page.



## Follow-up actions associated with ethics approval

For the project entitled **Personalize concerto: Patient usability experience optimized for embedded, coordinated, and efficient healthcare** (file number: 2018-067)

1. Notify the Committee in writing without undue delay (independent of its statutory meeting agenda) in the following situations:
  - Any changes to the project, as approved this day, that would include changes to the choice of participants, to recruitment, to the obtention of consent, to the collection of data, and/or to the incurred risks or disadvantages before the application of any such changes (the template of the letter requesting an amendment is available on the CÉRUL website).
  - Any changes to the instrument used for recruitment (ads, posters, or other instruments), to the confirmation of consent (consent form, information sheet, or other forms of confirmation), or to the collection of data (survey, interview grid, or other data collection mechanisms) by providing the latest version of the document under consideration, where changes will be highlighted, before its use.
  - Any unexpected and serious event (e.g. psychological distress of a participant, threat against a person, unexpected or side effects of a product, a drug or a test) that may occur in the course of the current project and would involve a participant, by completing the VRR-EI form available on the CÉRUL website.
  - Any early termination of this research for any reason, be it funded or not, including reasons due to suspension or cancellation on the part of the granting agency.
2. Until the project is finished, and not only for recruitment, submit an annual renewal request for approval by providing a report on research progress, the number of recruited participants, and the difficulties encountered along the way, by using the VRR-107 form. The renewal request must be sent to the committee at least 30 days before the end date of the approval, independent of the statutory meeting agenda.

I, the undersigned, Marie-Pierre Gagnon, declare that I **have read and understood the above follow-up actions associated with ethics approval** and agree to apply them during the entire research project for which I am the principal researcher.

Signature of the principal researcher: \_\_\_\_\_

Date: 2018-06-04

## Supplementary File 6: Ethical approval (original French version)

|                                                                                                                                                                                                                                                                                                                                                                                                                                                                                         |                                                                                                          |
|-----------------------------------------------------------------------------------------------------------------------------------------------------------------------------------------------------------------------------------------------------------------------------------------------------------------------------------------------------------------------------------------------------------------------------------------------------------------------------------------|----------------------------------------------------------------------------------------------------------|
|                                                                                                                                                                                                                                                                                                                                                                                                        |                                                                                                          |
| Vice-rectorat à la recherche et à la création<br>Comité d'éthique de la recherche                                                                                                                                                                                                                                                                                                                                                                                                       |                                                                                                          |
| <h2>APPROBATION DE L'ÉTHIQUE</h2>                                                                                                                                                                                                                                                                                                                                                                                                                                                       |                                                                                                          |
| Projet de recherche impliquant des êtres humains ou<br>la consultation de renseignements personnels                                                                                                                                                                                                                                                                                                                                                                                     |                                                                                                          |
| Ce projet de recherche a été examiné en conformité avec les<br><i>Modalités de gestion de l'éthique de la recherche sur des êtres humains</i> de l'Université Laval,<br>par le <b>Comité sectoriel d'éthique de la recherche en sciences de la santé</b>                                                                                                                                                                                                                                |                                                                                                          |
| <b>Projet intitulé :</b>                                                                                                                                                                                                                                                                                                                                                                                                                                                                | Personnaliser CONCERTO : L'expérience patient optimisée pour des soins intégrés, coordonnés et efficaces |
| <b>Nom du chercheur :</b>                                                                                                                                                                                                                                                                                                                                                                                                                                                               | Madame Marie-Pierre Gagnon                                                                               |
| <b>Numéro d'approbation :</b>                                                                                                                                                                                                                                                                                                                                                                                                                                                           | 2018-067 / 01-06-2018                                                                                    |
| <b>Date de décision :</b>                                                                                                                                                                                                                                                                                                                                                                                                                                                               | 1 <sup>er</sup> juin 2018                                                                                |
| <b>Date d'expiration de l'approbation :</b>                                                                                                                                                                                                                                                                                                                                                                                                                                             | 1 <sup>er</sup> juillet 2019                                                                             |
| <p>Après examen des informations et des documents qui lui ont été transmis, le Comité a constaté que ce projet respecte les principes d'éthique de la recherche avec des êtres humains. Il prend acte de la confirmation écrite de la chercheuse à l'effet qu'elle a pris connaissance des mesures de suivi<sup>1</sup> associées à l'émission de l'approbation éthique de son projet et qu'elle accepte de les appliquer. Par conséquent, le Comité approuve ce projet pour un an.</p> |                                                                                                          |
| <br><hr/> <b>Mahmoud Rouabhia</b> , président<br>Comité d'éthique de la recherche en sciences de la santé                                                                                                                                                                                                                                                                                            | 6 juin 2018<br><hr/> Date                                                                                |
| <sup>1</sup> Rappel des mesures de suivi au verso                                                                                                                                                                                                                                                                                                                                                                                                                                       |                                                                                                          |
| Maison Michael-John-Brophy<br>2241, chemin Sainte-Foy<br>Québec (Québec) G1V 0A6<br>CANADA                                                                                                                                                                                                                                                                                                                                                                                              | 418 656-2131, poste 4506<br>Télécopieur : 418 656-2840<br>cer@vrr.ulaval.ca<br>www.cer.ulaval.ca         |

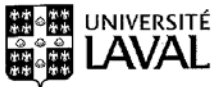

Vice-rectorat à la recherche et à la création  
Comité d'éthique de la recherche

## Mesures de suivi associées à l'approbation éthique

Pour le projet intitulé : **Personnaliser CONCERTO : L'expérience patient optimisée pour des soins intégrés, coordonnés et efficaces** (numéro de dossier : 2018-067)

1. Informer le Comité par écrit et dans les meilleurs délais (indépendamment du calendrier de ses réunions statutaires) des situations suivantes si elles se présentent :
  - de **toute modification au projet**, comme il a été approuvé en ce jour, qui comporterait des changements dans le choix des participants, dans le recrutement, dans la manière d'obtenir leur consentement, de réaliser la collecte des données ou encore, dans les risques ou inconvénients encourus par la participation, et ce, préalablement à l'application de ce changement (modèle de lettre de demande d'amendement disponible sur le site Internet des CÉRUL) ;
  - de **toute modification** qui serait apportée à un **instrument utilisé pour le recrutement** (annonces, affiches, etc.), pour confirmer le **consentement** (formulaire de consentement, feuillet d'information, etc.) ou pour effectuer la **collecte** des données (questionnaire, grille d'entrevue, etc.) en fournissant la nouvelle version du document concerné, où les modifications auront été mises en évidence, préalablement à son utilisation ;
  - de **tout événement imprévu et sérieux** (ex. : détresse psychologique d'un participant, menace proférée à l'égard d'une personne, effets secondaires ou imprévus ou indésirables d'un produit, d'un médicament ou d'un test, etc.) qui surviendrait dans le déroulement d'une activité du présent projet et qui impliquerait un participant, en complétant le formulaire VRR-EI disponible sur le site Internet des CÉRUL ;
  - de **l'interruption prématurée de ce projet de recherche** pour une raison quelconque qu'il soit financé ou non, y compris en raison de la suspension ou de l'annulation de l'approbation d'un organisme subventionnaire.
2. Tant que le projet ne sera pas terminé, et non seulement le recrutement, présenter annuellement une **demande de renouvellement** de l'approbation, en fournissant un rapport sur le déroulement de la recherche, le nombre de participants recrutés et, le cas échéant, sur les difficultés rencontrées en cours de réalisation, à l'aide du formulaire VRR-107. La demande de renouvellement doit être transmise au Comité dans un délai de 30 jours avant la date de fin de l'approbation, indépendamment du calendrier des réunions statutaires.

Maison Michael-John-Brophy  
2241, chemin Sainte-Foy  
Québec (Québec) G1V 0A6  
CANADA

418 656-2131, poste 4506  
Télécopieur : 418 656-2840  
cer@vrr.ulaval.ca  
www.cerul.ulaval.ca

1 Research title: Personalize concerto: Patient usability experience optimized for embedded, coordinated, and efficient healthcare  
2  
3  
4

### 5 **Supplementary File 7: Consent form for validation cycles**

6 This research entitled "Optimizing patient usability experience with an eHealth platform for embedded, coordinated  
7 and efficient healthcare" is conducted by Marie-Pierre Gagnon, from faculty of nursing at Université Laval.  
8

9 Before you agree to take part in this research project, please take the time to read and understand the following  
10 information. This document will explain you the aim of this research project, his process, advantages, risks and  
11 disadvantages. We invite you to ask all questions you may deem necessary to the research staff. You can find  
12 their contact details at the end of the form.  
13  
14

#### 15 **Type of study**

16 This research project aims to develop, implement and evaluate a user-centered, multifunctional and personalized  
17 eHealth platform (CONCERTO+) to promote a more active patient role in chronic disease management and  
18 decision-making, satisfaction towards healthcare services and quality of life. Specific objectives are to:  
19

20 1) develop a module of a multifunctional and personalized eHealth platform integrated to the CHP (Concerto Health  
21 Program) for patients and caregivers allowing them to engage in the follow-up and management of their chronic  
22 diseases;  
23

24 2) test the integration of CONCERTO+ in monitoring care pathways of three frequent co-existing chronic diseases  
25 (diabetes, hypertension, dyslipidemia) and assess the usefulness and acceptability of the solution for patients with  
26 chronic diseases and their caregivers;  
27

28 3) assess the scalability of the CONCERTO+ solution.  
29  
30

#### 31 **The course of the participation:**

##### 32 Validation of the prototype of the application CONCERTO+

33 Your participation in this research will consist in validating the prototype of the application CONCERTO+. In  
34 practical terms, you should go to the usability laboratory of Université Laval lead by Dr Holly Witteman. The  
35 validation of the application will be done either on a smartphone or a digital tablet. The aim is to collect your input  
36 in visual presentation, content, usability of the application, the pros and cons and any consideration of the  
37 application developed. Iterative testing via three validation sessions will be organized. If you agree to participate  
38 to the validation cycles, your participation may have incur parking and travel expenses. In addition, the participation  
39 in each validation cycle requires approximately one and a half hour of your time.  
40  
41  
42  
43  
44  
45  
46  
47  
48  
49  
50  
51  
52  
53  
54  
55  
56  
57

1 Research title: Personalize concerto: Patient usability experience optimized for embedded, coordinated, and efficient healthcare

## 2 3 4 **Potential benefits and risks or disadvantages related to your participation**

5 There are no direct benefits for the participants. However, this research enables improve the adaptation and value  
6 of the CHP in order to provide a multifunctional and personalized eHealth platform, to promote a more active  
7 patient and informal care givers role in chronic disease management.  
8  
9

## 10 **Compensation**

11 If you participate in validation cycles, we can provide you a lump sum amount of 18 \$ for the time you have  
12 allocated for this activity. This sum will be returned in each validation session.  
13

## 14 **Voluntary participation and right to withdraw**

15 You are free to participate to this research project. You may voluntarily withdraw at any time without any  
16 justification and with no adverse consequences or without prejudice. However If you decide so, It is important to  
17 inform the research team whose contact details are included at the end of the document. All your personal  
18 information will be destroyed.  
19  
20

## 21 **Confidentiality and data management**

22 The following measures will be applied to ensure your private information stays private:

- 23 •Your name will not be mentioned in any report;
- 24 •The various documents will be codified and only the investigator and his team will have access to the list of names  
25 and codes;
- 26 • Your individual results will never be shared;
- 27 • In the interest of scientific rigor, the electronic data will be kept in a folder with a password on the web server of  
28 the Canada Research Chair on Technology and Practices in Health at Université Laval. They will be destroyed  
29 only five years after the end of the research, in December 2024;
- 30 • This research will be published in scientific reviews and no one can able to identify you;
- 31 • A short summary of the research results will be sent to you if requested by indicating the address where you  
32 would like to receive the document, just after the blank space provided for your signature.  
33  
34

## 35 **Acknowledgment**

36 Your collaboration is useful to achieve this study, thank you for your participation.  
37  
38

## 39 **Additional information**

40 If you have any question on the research, the involvement of your participation or if you want to withdraw from this  
41 research, please contact: Mame Awa Ndiaye, research coordinator, Amélie Lampron, research coordinator or  
42 Marie-Pierre Gagnon, principal investigator at the following coordinates:

- 43 • Mame Awa Ndiaye: [mame-awa.ndiaye.ciusssc@ssss.gouv.qc.ca](mailto:mame-awa.ndiaye.ciusssc@ssss.gouv.qc.ca)
- 44 • Amélie Lampron: [amelie.lampron2.ciusssc@ssss.gouv.qc.ca](mailto:amelie.lampron2.ciusssc@ssss.gouv.qc.ca)
- 45 • Marie-Pierre Gagnon: [marie-pierre.gagnon@fsi.ulaval.ca](mailto:marie-pierre.gagnon@fsi.ulaval.ca)  
46

## 47 **Complaints and criticism**

48 Any complaint and criticism related to this research project will be addressed to the Ombudsman office at  
49 Université Laval:

50 Pavillon Alphonse-Desjardins, bureau 3320  
51 2325, rue de l'Université  
52 Université Laval  
53 Québec (Québec) G1V 0A6  
54 Information - Secretariat : (418) 656-3081  
55  
56

57  
58 Project approved by the sectorial committee of research ethics in health science of Université Laval (**Approval number 2018-067**),  
59 June 1<sup>st</sup> 2018. MPG

Research title: Personalize concerto: Patient usability experience optimized for embedded, coordinated, and efficient healthcare

Toll-free line: 1-866-323-2271

Email: [info@ombudsman.ulaval.ca](mailto:info@ombudsman.ulaval.ca)

## Signatures

I, the undersigned \_\_\_\_\_ freely consent to participate to the research entitled: «Personalize concerto: Patient usability experience optimized for embedded, coordinated, and efficient healthcare». I have read and understood the aim, type, advantages, risks and disadvantages of the research project. I'm satisfied with the explanations, further details and responses received from the investigator, where appropriate, about my participation to this project.

\_\_\_\_\_  
Participant signature

\_\_\_\_\_  
Date

A short summary of the search results will be sent to you if requested by indicating the address where you would like to receive the document. **The results will not be available before December 20th. If your address changes by that date, you are invited to inform the research team, the new address you wish to receive the document.**

I wish receive a short summary

No, I would prefer not to receive summary

I would like to receive the summary at the following email address or mailing address:

\_\_\_\_\_  
\_\_\_\_\_

I explained the aim, type of the study, advantages, risks and disadvantages of the research project I have answered to the best of my knowledge the questions asked and have verified the understanding of the participant.

\_\_\_\_\_  
Investigator or research coordinator signature

\_\_\_\_\_  
Date

**Copy of the participant.**

1 Research title: Personalize concerto: Patient usability experience optimized for embedded, coordinated, and efficient healthcare

2  
3  
4 **List of the team members/ Names of project**  
5 **partners**

**Role in the project**

6 Marie-Pierre Gagnon

Specialist of patient engagement and eHealth  
technology assessment

7  
8  
9  
10  
11 Christian Chabot

Patient partner, co-designer of the project

12  
13 Guylaine Chabot, Alain Larouche

Technological partners

14  
15 France Légaré, Anik Giguère, Annie LeBlanc

Experts in shared decision making

16  
17 Samira Rahimi Abbasgholizadeh

Expert in decision aids tools

18  
19 Jean-Paul Fortin, Aude Motulsky, Claude Sicotte

Experts in evaluation of health information  
systems

20  
21  
22 Holly Witteman

Expert in adaptation of user-centered technologies

23  
24 Ronald Buyl

Expert in medical informatics and biostatistics

25  
26 Carole Délétroz

Expert in health literacy

27  
28 Erik Kavanagh, Frédéric Lépinay, Jacynthe  
29 Roberge

Specialists in application development and design

30  
31  
32 Amélie Lampron, Mame Awa Ndiaye

Research coordinators

Research title: Personalize concerto: Patient usability experience optimized for embedded, coordinated, and efficient healthcare

## **Supplementary File 8: Consent form (patients and informal caregivers) 2a**

This research entitled "Optimizing patient usability experience with an eHealth platform for embedded, coordinated and efficient healthcare" is conducted by Marie-Pierre Gagnon, from faculty of nursing at Université Laval.

Before you agree to take part in this research project, please take the time to read and understand the following information. This document will explain you the aim of this research project, his process, advantages, risks and disadvantages. We invite you to ask all questions you may deem necessary to the research staff. You can find their contact details at the end of the form.

### **Type of study**

This research project aims to develop, implement and evaluate a user-centered, multifunctional and personalized eHealth platform (CONCERTO+) to promote a more active patient role in chronic disease management and decision-making, satisfaction towards healthcare services and quality of life. Specific objectives are to:

- 1) develop a module of a multifunctional and personalized eHealth platform integrated to the CHP (Concerto Health Program) for patients and caregivers allowing them to engage in the follow-up and management of their chronic diseases;
- 2) test the integration of CONCERTO+ in monitoring care pathways of three frequent co-existing chronic diseases (diabetes, hypertension, dyslipidemia) and assess the usefulness and acceptability of the solution for patients with chronic diseases and their caregivers;
- 3) assess the scalability of the CONCERTO+ solution.

### **The course of the participation:**

#### **1) Validation of the prototype of the application CONCERTO+**

Your participation in this research will consist in using the application CONCERTO+ (intervention group) or to continue your usual health follow-up (control group). For the participants of the intervention group, the use of the application will be explained to you by the members of the research team. You will complete a short questionnaire at the beginning and at the end of a six months period use, which will focus on the following points:

- Health management
- Feelings in competency and self confidence in health management
- Impacts of CONCERTO+ use
- The use of CONCERTO+

#### **2) Focus group**

Your participation in this research consists in participating in a focus group composed of 8 -12 people. The discussion will last approximately two hours and will focus on conditions and factors related to the wide-scale dissemination of the solution CONCERTO+.



1 Research title: Personalize concerto: Patient usability experience optimized for embedded, coordinated, and efficient healthcare

## 2 3 4 **Potential benefits and risks or disadvantages related to your participation**

5 There are no direct benefits for the participants. However, participating in this research enables improve the  
6 adaptation and value of the CHP in order to provide a multifunctional and personalized eHealth platform, to  
7 promote a more active patient and informal care givers role in chronic disease management.  
8  
9

## 10 **Compensation**

11 If you accept to participate, a lump sum of 50 \$ will be offered to you for the time you have allocated for this  
12 activity. This sum will be returned to you during the focus group discussion.  
13  
14

## 15 **Voluntary participation and right to withdraw**

16 You are free to participate to this research project. You may voluntarily withdraw at any time without any  
17 justification and with no adverse consequences or without prejudice. However If you decide so, It is important to  
18 inform the research team whose contact details are included at the end of the document. All your personal  
19 information will be destroyed.  
20  
21

## 22 **Confidentiality and data management**

23 The following measures will be applied to ensure your private information stays private:

- 24 •Your name will not be mentioned in any report;
- 25 •The various documents will be codified and only the investigator and his team will have access to the list of  
26 names and codes;
- 27 • Your individual results will never be shared;
- 28 • In the interest of scientific rigor, the electronic data will be kept in a folder with a password on the web server of  
29 the Canada Research Chair on Technology and Practices in Health at Université Laval. They will be destroyed  
30 only five years after the end of the research, in December 2024;
- 31 • This research will be publicated in scientific reviews and no one can able to identify you;
- 32 • A short summary of the research results will be sent to you if requested by indicating the address where you  
33 would like to receive the document, just after the blank space provided for your signature.  
34  
35

## 36 **Acknowledgment**

37 Your collaboration is useful to achieve this study, thank you for your participation.  
38  
39

## 40 **Additional information**

41 If you have any question on the research, the involvement of your participation or if you want to withdraw from this  
42 research, please contact: Mame Awa Ndiaye, research coordinator, Amélie Lampron, research coordinator or  
43 Marie-Pierre Gagnon, principal investigator at the following coordinates:

- 44 • Mame Awa Ndiaye: mame-awa.ndiaye.ciussscn@ssss.gouv.qc.ca
- 45 • Amélie Lampron: amelie.lampron2.ciussscn@ssss.gouv.qc.ca
- 46 • Marie-Pierre Gagnon: [marie-pierre.gagnon@fsi.ulaval.ca](mailto:marie-pierre.gagnon@fsi.ulaval.ca)  
47

## 48 **Complaints and criticism**

49 Any complaint and criticism related to this research project will be addressed to the Ombudsman office at  
50 Université Laval:

51 Pavillon Alphonse-Desjardins, bureau 3320  
52 2325, rue de l'Université  
53 Université Laval  
54 Québec (Québec) G1V 0A6  
55 Information - Secretariat : (418) 656-3081  
56  
57

58 Project approved by the sectorial committee of research ethics in health science of Université Laval (**Approval number 2018-067**),  
59 June 1<sup>st</sup> 2018. MPG

Research title: Personalize concerto: Patient usability experience optimized for embedded, coordinated, and efficient healthcare

Toll-free line: 1-866-323-2271

Email: [info@ombudsman.ulaval.ca](mailto:info@ombudsman.ulaval.ca)

### Signatures

I, the undersigned \_\_\_\_\_ freely consent to participate to the research entitled: «Personalize concerto: Patient usability experience optimized for embedded, coordinated, and efficient healthcare». I have read and understood the aim, type, advantages, risks and disadvantages of the research project. I'm satisfied with the explanations, further details and responses received from the investigator, where appropriate, about my participation to this project.

\_\_\_\_\_  
Participant signature

\_\_\_\_\_  
Date

Do you wish to participate in the first step of this research involving the use of application CONCERTO+ and the completion of two questionnaires on the active involvement?

Yes, i accept to participate  No, i would prefer not to participate

Do you wish to participate in the second step of the project involving the participation in a focus group on factors and conditions related to the wide-scale dissemination of the solution CONCERTO+?

Yes, i accept to participate  No, i would prefer not to participate

A short summary of the search results will be sent to you if requested by indicating the address where you would like to receive the document. **The results will not be available before December 20th. If your address changes by that date, you are invited to inform the research team, the new address you wish to receive the document.**

I wish receive a short summary  No, I would prefer not to receive summary

I would like to receive the summary at the following email address or mailing address:

\_\_\_\_\_  
\_\_\_\_\_

I explained the aim, type of the study, advantages, risks and disadvantages of the research project I have answered to the best of my knowledge the questions asked and have verified the understanding of the participant.

\_\_\_\_\_  
Investigator or research coordinator signature

\_\_\_\_\_  
Date

**Copy of the participant.**

Project approved by the sectorial committee of research ethics in health science of Université Laval (**Approval number 2018-067**), June 1<sup>st</sup> 2018. MPG

1 Research title: Personalize concerto: Patient usability experience optimized for embedded, coordinated, and efficient healthcare  
2  
3

#### 4 **Supplementary File 9: Consent form (interviews)**

5  
6 This research entitled "Optimizing patient usability experience with an eHealth platform for embedded, coordinated  
7 and efficient healthcare" is conducted by Marie-Pierre Gagnon, from faculty of nursing at Université Laval.  
8  
9

10 Before you agree to take part in this research project, please take the time to read and understand the following  
11 information. This document will explain you the aim of this research project, his process, advantages, risks and  
12 disadvantages. We invite you to ask all questions you may deem necessary to the research staff. You can find  
13 their contact details at the end of the form.  
14  
15

#### 16 **Type of study**

17 This research project aims to develop, implement and evaluate a user-centered, multifunctional and personalized  
18 eHealth platform (CONCERTO+) to promote a more active patient role in chronic disease management and  
19 decision-making, satisfaction towards healthcare services and quality of life. Specific objectives are to:  
20

21 1) develop a module of a multifunctional and personalized eHealth platform integrated to the CHP (Concerto Health  
22 Program) for patients and caregivers allowing them to engage in the follow-up and management of their chronic  
23 diseases;  
24

25 2) test the integration of CONCERTO+ in monitoring care pathways of three frequent co-existing chronic diseases  
26 (diabetes, hypertension, dyslipidemia) and assess the usefulness and acceptability of the solution for patients with  
27 chronic diseases and their caregivers;  
28

29 3) assess the scalability of the CONCERTO+ solution.  
30

#### 31 **The course of the participation:**

32 Your participation to this research consists in participating in one-on-one semi-structured interview with a  
33 member of the team. This interview will last approximately 30 minutes and will focus on the following points:  
34

- 35 • Factors facilitating the use of CONCERTO+
- 36 • Factors limiting the use of CONCERTO+
- 37 • Support to the use of CONCERTO+ by health professionals
- 38 • Expansion of CONCERTO+
- 39
- 40
- 41
- 42
- 43
- 44
- 45
- 46
- 47
- 48
- 49
- 50
- 51
- 52
- 53
- 54
- 55
- 56
- 57

Research title: Personalize concerto: Patient usability experience optimized for embedded, coordinated, and efficient healthcare

### Potential benefits and risks or disadvantages related to your participation

There are no direct benefits for the participants. However, participating in this research enables improve the adaptation and value of the CHP in order to provide a multifunctional and personalized eHealth platform, to promote a more active patient and informal care givers role in chronic disease management.

### Compensation

If you accept to participate, a lump sum of 50 \$ will be offered to you for the time you have allocated for this activity. This sum will be returned to you during the focus group discussion.

### Voluntary participation and right to withdraw

You are free to participate to this research project. You may voluntarily withdraw at any time without any justification and with no adverse consequences or without prejudice. However If you decide so, It is important to inform the research team whose contact details are included at the end of the document. All your personal information will be destroyed.

### Confidentiality and data management

The following measures will be applied to ensure your private information stays private:

- Your name will not be mentioned in any report;
- The various documents will be codified and only the investigator and his team will have access to the list of names and codes;
- Your individual results will never be shared;
- In the interest of scientific rigor, the electronic data will be kept in a folder with a password on the web server of the Canada Research Chair on Technology and Practices in Health at Université Laval. They will be destroyed only five years after the end of the research, in December 2024;
- This research will be publicated in scientific reviews and no one can able to identify you;
- A short summary of the research results will be sent to you if requested by indicating the address where you would like to receive the document, just after the blank space provided for your signature.

### Acknowledgment

Your collaboration is useful to achieve this study, thank you for your participation.

### Additional information

If you have any question on the research, the involvement of your participation or if you want to withdraw from this research, please contact: Mame Awa Ndiaye, research coordinator, Amélie Lampron, research coordinator or Marie-Pierre Gagnon, principal investigator at the following coordinates:

- Mame Awa Ndiaye: [mame-awa.ndiaye.ciusscn@ssss.gouv.qc.ca](mailto:mame-awa.ndiaye.ciusscn@ssss.gouv.qc.ca)
- Amélie Lampron: [amelie.lampron2.ciusscn@ssss.gouv.qc.ca](mailto:amelie.lampron2.ciusscn@ssss.gouv.qc.ca)
- Marie-Pierre Gagnon: [marie-pierre.gagnon@fsi.ulaval.ca](mailto:marie-pierre.gagnon@fsi.ulaval.ca)

### Complaints and criticism

Any complaint and criticism related to this research project will be addressed to the Ombudsman office at Université Laval:

Pavillon Alphonse-Desjardins, bureau 3320  
2325, rue de l'Université  
Université Laval  
Québec (Québec) G1V 0A6  
Information - Secretariat : (418) 656-3081

Project approved by the sectorial committee of research ethics in health science of Université Laval (Approval number 2018-067), June 1<sup>st</sup> 2018. MPG

1 Research title: Personalize concerto: Patient usability experience optimized for embedded, coordinated, and efficient healthcare

2  
3  
4 Toll-free line: 1-866-323-2271

5 Email: [info@ombudsman.ulaval.ca](mailto:info@ombudsman.ulaval.ca)

### 8 Signatures

9 I, the undersigned \_\_\_\_\_ freely consent to participate to the research entitled:  
10 «Personalize concerto: Patient usability experience optimized for embedded, coordinated, and efficient  
11 healthcare». I have read and understood the aim, type, advantages, risks and disadvantages of the research  
12 project. I'm satisfied with the explanations, further details and responses received from the investigator, where  
13 appropriate, about my participation to this project.  
14

15  
16 \_\_\_\_\_  
17 Participant signature

\_\_\_\_\_ Date

18  
19 A short summary of the search results will be sent to you if requested by indicating the address where you would  
20 like to receive the document. **The results will not be available before December 20th. If your address changes  
21 by that date, you are invited to inform the research team, the new address you wish to receive the  
22 document.**

23  
24 I wish receive a short summary

No, I would prefer not to receive summary

25  
26 I would like to receive the summary at the following email address or mailing address:  
27

28  
29 \_\_\_\_\_  
30 \_\_\_\_\_  
31

32  
33 I explained the aim, type of the study, advantages, risks and disadvantages of the research project I have  
34 answered to the best of my knowledge the questions asked and have verified the understanding of the  
35 participant.  
36

37  
38 \_\_\_\_\_  
39 Investigator or research coordinator signature

\_\_\_\_\_ Date

40 Copy of the participant.  
41  
42  
43  
44  
45  
46  
47  
48  
49  
50  
51  
52  
53  
54  
55  
56  
57

Supplementary File 10: Funding

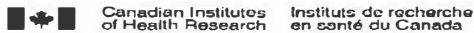

**AUTHORIZATION FOR FUNDING**  
 CIHR (Canadian Institutes of Health Research) has approved funding as detailed below. Subject to the approval of funding by Parliament, these funds will be made available to the business officer at the indicated institution for disbursement.

**AUTORISATION DE FINANCEMENT**  
 IRSC (Instituts de recherche en santé du Canada) vous accorde les fonds tel qu'indiqué ci-dessous. Suivant l'affectation des crédits par le Parlement du Canada, les fonds seront mis à la disposition du trésorier de l'établissement indiqué qui s'occupera des versements.

201706PCG-385330-PCG-CFBA-111141

20/12/2017

**Institution Paid/Établissement chargé d'administrer les fonds:**  
 Université Laval

**Recipient(s)/Bénéficiaire(s):**  
 Gagnon, Marie-Pierre  
 CHU de Québec

**Program/Programme:**  
 Subvention catalyseur: Subventions Catalyseur sur la santé personnalisée  
 Nouvelle subvention

In Partnership with/En partenariat avec : IRSC - Grandes initiatives #2; IRSC - Institut du Cancer; IRSC - Inst santé femmes et hommes; IRSC - Inst services politiq de santé; IRSC - Institut de génétique; IRSC - Institut du vieillissement

**Primary Institute/Institut principal:** Services et politiques de la santé

**Project Title/Titre du projet:**

Personnaliser CONCERTO; L'expérience patient optimisée pour des soins intégrés, coordonnés et efficaces

**Co-Investigator(s) & Associates/Supervisor(s)/Host/Co-chercheur(s)/Directeur(s) de recherche/Hôte:**

Dr. Samira Abbasgholizadeh Rahimi, Prof. Ronald Buyl, Mr. Christian Chabot, Docteur Jean-Paul Fortin, et coll.

| PAYMENT DETAILS/DÉTAILS DES VERSEMENTS |                | Funding Reference Number/<br>No. de Référence du financement: | PCG — 155469                               |
|----------------------------------------|----------------|---------------------------------------------------------------|--------------------------------------------|
| Period<br>Période                      | Type           | Amount by Type<br>Montant par type                            | Total by Fiscal Year<br>Total par exercice |
| 01/09/2017 à 31/03/2018                | Fonctionnement | \$58,080                                                      | \$58,080 2017-18                           |
| 01/04/2018 à 31/03/2019                | Fonctionnement | \$99,881                                                      | \$99,881 2018-19                           |
| 01/04/2019 à 31/08/2019                | Fonctionnement | \$41,568                                                      | \$41,568 2019-20                           |

**Progress Report Required:** Rapport des progrès réalisés requis: **Ne s'applique pas**      **Application to Renew Funding Required:** Demande de renouvellement des fonds requis: **Non Renouvelable**

**NOTES:**  
 Les IRSC exigent que leur contribution à votre recherche soit reconnue dans toutes les présentations écrites et orales de vos résultats de recherche, qu'il s'agisse d'articles scientifiques, de communications, de conférences de presse, de conférences publiques ou d'entrevues avec les médias. Votre numéro de référence du financement (NRF), qui apparaît dans la section « Détails des paiements » ci-dessus, doit être précisé lorsqu'il est question d'articles scientifiques pour lesquels le soutien des IRSC est reconnu. Veuillez consulter les lignes directrices des IRSC ci-jointes en matière de communications publiques pour plus de détails sur les communications publiques et les exigences relatives à la reconnaissance du soutien.  
 Vous avez reçu ces fonds grâce à vos collègues qui ont donné de leur temps pour aider les IRSC à étudier votre demande. En retour, nous vous demandons de bien vouloir participer aux activités d'évaluation par les pairs des IRSC si on vous invite à le faire.  
 En retirant les fonds offerts dans le cadre de cette subvention/bourse, vous acceptez par le fait même les modalités énoncées dans le document « Conditions de financement » ci-joint. Toute dérogation pourrait entraîner la prise de mesures correctives par les IRSC comme précisé à cet égard.  
 Si vous recevez ou devenez admissible à recevoir du financement d'une autre source pour l'une ou l'autre des parties du projet visé, vous devez en informer les IRSC immédiatement en suivant les instructions données dans le formulaire « Déclaration de chevauchement de financement » que vous trouverez à l'adresse <http://www.cihr-irsc.gc.ca/f/797.html>, faute de quoi les IRSC pourraient annuler tout le financement lié à cette subvention.  
 La présente est une subvention d'un terme de 2 ans qui sera payée dans les années financières 2017-18 et 2019-20 avec une date d'entrée en vigueur du 01/09/2017 couvrant la période jusqu'au 31/08/2019.  
 Les IRSC vous demanderont de soumettre un rapport final électronique pour cette subvention par le Système de rapports de recherche sur RechercheNet. Des instructions vous seront fournies par courrier électronique provenant de RechercheNet dès que l'activité deviendra disponible.

*Nathalie Gendron*  
 Nathalie Gendron, Ph.D.  
 Gestionnaire, Exécution des concours  
 Conception et exécution des programmes  
 Portefeuille de la recherche, de l'application des connaissances et de l'éthique

- cc — Supervisor/Directeur
- Dean/Doyen
- Host/Hôte
- Administration
- Accountant/Comptable
- CIHR Finance/Service des Finances d'IRSC
- Other/Autre

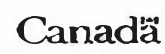

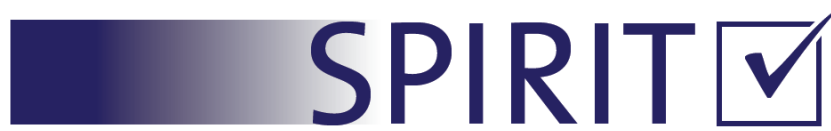

STANDARD PROTOCOL ITEMS: RECOMMENDATIONS FOR INTERVENTIONAL TRIALS

**Introduction**

|                          |    |                                                                                                                                                                                                           |
|--------------------------|----|-----------------------------------------------------------------------------------------------------------------------------------------------------------------------------------------------------------|
| Background and rationale | 6a | Description of research question and justification for undertaking the trial, including summary of relevant studies (published and unpublished) examining benefits and harms for each intervention        |
|                          | 6b | Explanation for choice of comparators                                                                                                                                                                     |
| Objectives               | 7  | Specific objectives or hypotheses                                                                                                                                                                         |
| Trial design             | 8  | Description of trial design including type of trial (eg, parallel group, crossover, factorial, single group), allocation ratio, and framework (eg, superiority, equivalence, noninferiority, exploratory) |

| Pages |
|-------|
| 6     |
| 9     |

**Methods: Participants, interventions, and outcomes**

|                      |     |                                                                                                                                                                                                                                                                                                                                                                                |
|----------------------|-----|--------------------------------------------------------------------------------------------------------------------------------------------------------------------------------------------------------------------------------------------------------------------------------------------------------------------------------------------------------------------------------|
| Study setting        | 9   | Description of study settings (eg, community clinic, academic hospital) and list of countries where data will be collected. Reference to where list of study sites can be obtained                                                                                                                                                                                             |
| Eligibility criteria | 10  | Inclusion and exclusion criteria for participants. If applicable, eligibility criteria for study centres and individuals who will perform the interventions (eg, surgeons, psychotherapists)                                                                                                                                                                                   |
| Interventions        | 11a | Interventions for each group with sufficient detail to allow replication, including how and when they will be administered                                                                                                                                                                                                                                                     |
|                      | 11b | Criteria for discontinuing or modifying allocated interventions for a given trial participant (eg, drug dose change in response to harms, participant request, or improving/worsening disease)                                                                                                                                                                                 |
|                      | 11c | Strategies to improve adherence to intervention protocols, and any procedures for monitoring adherence (eg, drug tablet return, laboratory tests)                                                                                                                                                                                                                              |
|                      | 11d | Relevant concomitant care and interventions that are permitted or prohibited during the trial                                                                                                                                                                                                                                                                                  |
| Outcomes             | 12  | Primary, secondary, and other outcomes, including the specific measurement variable (eg, systolic blood pressure), analysis metric (eg, change from baseline, final value, time to event), method of aggregation (eg, median, proportion), and time point for each outcome. Explanation of the clinical relevance of chosen efficacy and harm outcomes is strongly recommended |

|       |
|-------|
| 13    |
| 13    |
| 13    |
| 13-15 |

1  
2  
3  
4  
5  
6  
7  
8  
9  
10  
11  
12  
13  
14  
15  
16  
17  
18  
19  
20  
21  
22  
23  
24  
25  
26  
27  
28  
29  
30  
31  
32  
33  
34  
35  
36  
37  
38  
39  
40  
41  
42  
43  
44  
45  
46  
47  
48  
49  
50  
51  
52  
53  
54  
55  
56  
57  
58  
59  
60

|                                                                     |     |                                                                                                                                                                                                                                                                                                                                                                                                              |    |
|---------------------------------------------------------------------|-----|--------------------------------------------------------------------------------------------------------------------------------------------------------------------------------------------------------------------------------------------------------------------------------------------------------------------------------------------------------------------------------------------------------------|----|
| 1Participant timeline                                               | 13  | Time schedule of enrolment, interventions (including any run-ins and washouts), assessments, and visits for participants. A schematic diagram is highly recommended (see Figure)                                                                                                                                                                                                                             | 15 |
| Sample size                                                         | 14  | Estimated number of participants needed to achieve study objectives and how it was determined, including clinical and statistical assumptions supporting any sample size calculations                                                                                                                                                                                                                        | 17 |
| Recruitment                                                         | 15  | Strategies for achieving adequate participant enrolment to reach target sample size                                                                                                                                                                                                                                                                                                                          | 17 |
| <b>Methods: Assignment of interventions (for controlled trials)</b> |     |                                                                                                                                                                                                                                                                                                                                                                                                              |    |
| Allocation:                                                         |     |                                                                                                                                                                                                                                                                                                                                                                                                              | 19 |
| Sequence generation                                                 | 16a | Method of generating the allocation sequence (eg, computer-generated random numbers), and list of any factors for stratification. To reduce predictability of a random sequence, details of any planned restriction (eg, blocking) should be provided in a separate document that is unavailable to those who enrol participants or assign interventions                                                     |    |
| Allocation concealment mechanism                                    | 16b | Mechanism of implementing the allocation sequence (eg, central telephone; sequentially numbered, opaque, sealed envelopes), describing any steps to conceal the sequence until interventions are assigned                                                                                                                                                                                                    |    |
| Implementation                                                      | 16c | Who will generate the allocation sequence, who will enrol participants, and who will assign participants to interventions                                                                                                                                                                                                                                                                                    |    |
| Blinding (masking)                                                  | 17a | Who will be blinded after assignment to interventions (eg, trial participants, care providers, outcome assessors, data analysts), and how                                                                                                                                                                                                                                                                    | 19 |
|                                                                     | 17b | If blinded, circumstances under which unblinding is permissible, and procedure for revealing a participant's allocated intervention during the trial                                                                                                                                                                                                                                                         |    |
| <b>Methods: Data collection, management, and analysis</b>           |     |                                                                                                                                                                                                                                                                                                                                                                                                              |    |
| Data collection methods                                             | 18a | Plans for assessment and collection of outcome, baseline, and other trial data, including any related processes to promote data quality (eg, duplicate measurements, training of assessors) and a description of study instruments (eg, questionnaires, laboratory tests) along with their reliability and validity, if known. Reference to where data collection forms can be found, if not in the protocol | 20 |
|                                                                     | 18b | Plans to promote participant retention and complete follow-up, including list of any outcome data to be collected for participants who discontinue or deviate from intervention protocols                                                                                                                                                                                                                    |    |



1  
2  
3  
4  
5  
6  
7  
8  
9  
10  
11  
12  
13  
14  
15  
16  
17  
18  
19  
20  
21  
22  
23  
24  
25  
26  
27  
28  
29  
30  
31  
32  
33  
34  
35  
36  
37  
38  
39  
40  
41  
42  
43  
44  
45  
46  
47  
48  
49  
50  
51  
52  
53  
54  
55  
56  
57  
58  
59  
60

|                                 |     |                                                                                                                                                                                                                                                                                                                                       |    |
|---------------------------------|-----|---------------------------------------------------------------------------------------------------------------------------------------------------------------------------------------------------------------------------------------------------------------------------------------------------------------------------------------|----|
| Data management                 | 19  | Plans for data entry, coding, security, and storage, including any related processes to promote data quality (eg, double data entry; range checks for data values). Reference to where details of data management procedures can be found, if not in the protocol                                                                     |    |
| Statistical methods             | 20a | Statistical methods for analysing primary and secondary outcomes. Reference to where other details of the statistical analysis plan can be found, if not in the protocol                                                                                                                                                              |    |
|                                 | 20b | Methods for any additional analyses (eg, subgroup and adjusted analyses)                                                                                                                                                                                                                                                              |    |
|                                 | 20c | Definition of analysis population relating to protocol non-adherence (eg, as randomised analysis), and any statistical methods to handle missing data (eg, multiple imputation)                                                                                                                                                       |    |
| <b>Methods: Monitoring</b>      |     |                                                                                                                                                                                                                                                                                                                                       |    |
| Data monitoring                 | 21a | Composition of data monitoring committee (DMC); summary of its role and reporting structure; statement of whether it is independent from the sponsor and competing interests; and reference to where further details about its charter can be found, if not in the protocol. Alternatively, an explanation of why a DMC is not needed |    |
|                                 | 21b | Description of any interim analyses and stopping guidelines, including who will have access to these interim results and make the final decision to terminate the trial                                                                                                                                                               |    |
| Harms                           | 22  | Plans for collecting, assessing, reporting, and managing solicited and spontaneously reported adverse events and other unintended effects of trial interventions or trial conduct                                                                                                                                                     |    |
| Auditing                        | 23  | Frequency and procedures for auditing trial conduct, if any, and whether the process will be independent from investigators and the sponsor                                                                                                                                                                                           |    |
| <b>Ethics and dissemination</b> |     |                                                                                                                                                                                                                                                                                                                                       |    |
| Research ethics approval        | 24  | Plans for seeking research ethics committee/institutional review board (REC/IRB) approval                                                                                                                                                                                                                                             | 21 |
| Protocol amendments             | 25  | Plans for communicating important protocol modifications (eg, changes to eligibility criteria, outcomes, analyses) to relevant parties (eg, investigators, REC/IRBs, trial participants, trial registries, journals, regulators)                                                                                                      |    |
| Consent or assent               | 26a | Who will obtain informed consent or assent from potential trial participants or authorised surrogates, and how (see Item 32)                                                                                                                                                                                                          |    |

1  
2  
3  
4  
5  
6  
7  
8  
9  
10  
11  
12  
13  
14  
15  
16  
17  
18  
19  
20  
21  
22  
23  
24  
25  
26  
27  
28  
29  
30  
31  
32  
33  
34  
35  
36  
37  
38  
39  
40  
41  
42  
43  
44  
45  
46  
47  
48  
49  
50  
51  
52  
53  
54  
55  
56  
57  
58  
59  
60

|                               |     |                                                                                                                                                                                                                                                                                     |                         |
|-------------------------------|-----|-------------------------------------------------------------------------------------------------------------------------------------------------------------------------------------------------------------------------------------------------------------------------------------|-------------------------|
|                               | 26b | Additional consent provisions for collection and use of participant data and biological specimens in ancillary studies, if applicable                                                                                                                                               |                         |
| Confidentiality               | 27  | How personal information about potential and enrolled participants will be collected, shared, and maintained in order to protect confidentiality before, during, and after the trial                                                                                                |                         |
| Declaration of interests      | 28  | Financial and other competing interests for principal investigators for the overall trial and each study site                                                                                                                                                                       | 40                      |
| Access to data                | 29  | Statement of who will have access to the final trial dataset, and disclosure of contractual agreements that limit such access for investigators                                                                                                                                     |                         |
| Ancillary and post-trial care | 30  | Provisions, if any, for ancillary and post-trial care, and for compensation to those who suffer harm from trial participation                                                                                                                                                       |                         |
| Dissemination policy          | 31a | Plans for investigators and sponsor to communicate trial results to participants, healthcare professionals, the public, and other relevant groups (eg, via publication, reporting in results databases, or other data sharing arrangements), including any publication restrictions | 21-22                   |
|                               | 31b | Authorship eligibility guidelines and any intended use of professional writers                                                                                                                                                                                                      |                         |
|                               | 31c | Plans, if any, for granting public access to the full protocol, participant-level dataset, and statistical code                                                                                                                                                                     |                         |
| <b>Appendices</b>             |     |                                                                                                                                                                                                                                                                                     |                         |
| Informed consent materials    | 32  | Model consent form and other related documentation given to participants and authorised surrogates                                                                                                                                                                                  | Supplementary Files 6-8 |
| Biological specimens          | 33  | Plans for collection, laboratory evaluation, and storage of biological specimens for genetic or molecular analysis in the current trial and for future use in ancillary studies, if applicable                                                                                      |                         |

\*It is strongly recommended that this checklist be read in conjunction with the SPIRIT 2013 Explanation & Elaboration for important clarification on the items. Amendments to the protocol should be tracked and dated. The SPIRIT checklist is copyrighted by the SPIRIT Group under the Creative Commons "[Attribution-NonCommercial-NoDerivs 3.0 Unported](https://creativecommons.org/licenses/by-nc-nd/3.0/)" license.

# BMJ Open

## Optimizing patient active role with a user-centered eHealth platform (CONCERTO+) in chronic diseases management: A study protocol for a pilot cluster randomized controlled trial

|                                 |                                                                                                                                                                                                                                                                                                                                                                                                                                                                                                                                                                                                                                                                                                                                                                                                                                                                                                                                                                                                                                                                                                                                                                                                                                                                                                                                                                                                                                                                                                                                                                                                                                                                                                                                                                                                                                                                                     |
|---------------------------------|-------------------------------------------------------------------------------------------------------------------------------------------------------------------------------------------------------------------------------------------------------------------------------------------------------------------------------------------------------------------------------------------------------------------------------------------------------------------------------------------------------------------------------------------------------------------------------------------------------------------------------------------------------------------------------------------------------------------------------------------------------------------------------------------------------------------------------------------------------------------------------------------------------------------------------------------------------------------------------------------------------------------------------------------------------------------------------------------------------------------------------------------------------------------------------------------------------------------------------------------------------------------------------------------------------------------------------------------------------------------------------------------------------------------------------------------------------------------------------------------------------------------------------------------------------------------------------------------------------------------------------------------------------------------------------------------------------------------------------------------------------------------------------------------------------------------------------------------------------------------------------------|
| Journal:                        | <i>BMJ Open</i>                                                                                                                                                                                                                                                                                                                                                                                                                                                                                                                                                                                                                                                                                                                                                                                                                                                                                                                                                                                                                                                                                                                                                                                                                                                                                                                                                                                                                                                                                                                                                                                                                                                                                                                                                                                                                                                                     |
| Manuscript ID                   | bmjopen-2018-028554.R1                                                                                                                                                                                                                                                                                                                                                                                                                                                                                                                                                                                                                                                                                                                                                                                                                                                                                                                                                                                                                                                                                                                                                                                                                                                                                                                                                                                                                                                                                                                                                                                                                                                                                                                                                                                                                                                              |
| Article Type:                   | Protocol                                                                                                                                                                                                                                                                                                                                                                                                                                                                                                                                                                                                                                                                                                                                                                                                                                                                                                                                                                                                                                                                                                                                                                                                                                                                                                                                                                                                                                                                                                                                                                                                                                                                                                                                                                                                                                                                            |
| Date Submitted by the Author:   | 14-Jan-2019                                                                                                                                                                                                                                                                                                                                                                                                                                                                                                                                                                                                                                                                                                                                                                                                                                                                                                                                                                                                                                                                                                                                                                                                                                                                                                                                                                                                                                                                                                                                                                                                                                                                                                                                                                                                                                                                         |
| Complete List of Authors:       | Gagnon, Marie-Pierre; Centre de Recherche sur les Soins et les Services de Première Ligne de l'Université Laval; Université Laval, Faculty of nursing<br>Ndiaye, Mame-Awa; Centre de Recherche sur les Soins et les Services de Première Ligne de l'Université Laval<br>Larouche, Alain; Groupe Santé Concerto<br>Chabot, Guylaine; Groupe Santé Concerto<br>Chabot, Christian; International Business Machines Corporation<br>Buyl, Ronald; Vrje Universiteit Brussel, Jette, Belgium<br>Fortin, Jean-Paul; Centre de Recherche sur les Soins et les Services de Première Ligne de l'Université Laval; Université Laval, Department of Family and Emergency Medicine<br>Giguere, Anik; Department of Family and Emergency Medicine, Université Laval; Centre de Recherche sur les Soins et les Services de Première Ligne de l'Université Laval<br>LeBlanc, Annie; Centre de Recherche sur les Soins et les Services de Première Ligne de l'Université Laval<br>Legare, France; Centre de Recherche sur les Soins et les Services de Première Ligne de l'Université Laval; Department of Family and Emergency Medicine, Université Laval<br>Motulsky, Aude; Department of Health Management, Evaluation and Policy, School of Public Health<br>Sicotte, Claude; Department of Health Management, Evaluation and Policy, School of Public Health, Université de Montréal, QC, Canada<br>Witteman, Holly; Department of Family and Emergency Medicine, Université Laval<br>Kavanagh, Eric; École de design, Université Laval<br>Lépinay, Frédéric; École de design, Université Laval<br>Roberge, Jacynthe; École de design, Université Laval<br>Déléroz, Carole; School of Health Sciences (HESAV), HES-SO University of Applied Sciences and Arts Western Switzerland Lausanne<br>Abbasgholzadeh, Samira Rahimi; McGill University, Department of Family Medicine, Montréal, Canada |
| <b>Primary Subject Heading</b>: | Health services research                                                                                                                                                                                                                                                                                                                                                                                                                                                                                                                                                                                                                                                                                                                                                                                                                                                                                                                                                                                                                                                                                                                                                                                                                                                                                                                                                                                                                                                                                                                                                                                                                                                                                                                                                                                                                                                            |
| Secondary Subject Heading:      | Nursing                                                                                                                                                                                                                                                                                                                                                                                                                                                                                                                                                                                                                                                                                                                                                                                                                                                                                                                                                                                                                                                                                                                                                                                                                                                                                                                                                                                                                                                                                                                                                                                                                                                                                                                                                                                                                                                                             |
| Keywords:                       | Chronic disease management, Multimorbidity, eHealth, Health Literacy,                                                                                                                                                                                                                                                                                                                                                                                                                                                                                                                                                                                                                                                                                                                                                                                                                                                                                                                                                                                                                                                                                                                                                                                                                                                                                                                                                                                                                                                                                                                                                                                                                                                                                                                                                                                                               |

1  
2  
3  
4  
5  
6  
7  
8  
9  
10  
11  
12  
13  
14  
15  
16  
17  
18  
19  
20  
21  
22  
23  
24  
25  
26  
27  
28  
29  
30  
31  
32  
33  
34  
35  
36  
37  
38  
39  
40  
41  
42  
43  
44  
45  
46  
47  
48  
49  
50  
51  
52  
53  
54  
55  
56  
57  
58  
59  
60

|  |                                                        |
|--|--------------------------------------------------------|
|  | User-centered design, Patient and caregiver engagement |
|  |                                                        |

SCHOLARONE™  
Manuscripts

1  
2  
3  
4  
5  
6  
7  
8  
9  
10  
11  
12  
13  
14  
15  
16  
17  
18  
19  
20  
21  
22  
23  
24  
25  
26  
27  
28  
29  
30  
31  
32  
33  
34  
35  
36  
37  
38  
39  
40  
41  
42  
43  
44  
45  
46  
47  
48  
49  
50  
51  
52  
53  
54  
55  
56  
57  
58  
59  
60

# Optimizing patient active role with a user-centered eHealth platform (CONCERTO+) in chronic diseases management: A study protocol for a pilot cluster randomized controlled trial

Marie-Pierre Gagnon<sup>1, 2</sup>, Mame Awa Ndiaye<sup>1</sup>, Alain Larouche<sup>3</sup>, Guylaine Chabot<sup>3</sup>, Christian Chabot<sup>4</sup>, Ronald Buyl<sup>5</sup>, Jean-Paul Fortin<sup>1</sup>, Anik Giguère<sup>6</sup>, Annie LeBlanc<sup>6</sup>, France Légaré<sup>1, 6</sup>, Aude Motulsky<sup>7</sup>, Claude Sicotte<sup>7</sup>, Holly O. Witteman<sup>6</sup>, Éric Kavanagh<sup>8</sup>, Frédéric Lépinay<sup>8</sup>, Jacynthe Roberge<sup>8</sup>, Carole Délétroz<sup>9</sup>, Samira Rahimi Abbasgholizadeh<sup>10</sup>

## Author's affiliations

<sup>1</sup>Centre de Recherche sur les Soins et les Services de Première Ligne de l'Université Laval, Quebec City, QC, Canada

<sup>2</sup> Faculty of Nursing, Université Laval, Quebec City, QC, Canada

<sup>3</sup> Groupe Santé Concerto, Montréal, QC, Canada

<sup>4</sup> Patient expert, Quebec City, QC, Canada

<sup>5</sup> Vrje Universiteit Brussel, Jette, Belgium

1  
2  
3 <sup>6</sup> Department of Family and Emergency Medicine, Université Laval, Quebec City, QC, Canada  
4  
5

6 <sup>7</sup> Department of Health Management, Evaluation and Policy, School of Public Health, Université  
7 de Montréal, QC, Canada  
8  
9

10 <sup>8</sup> École de design, Université Laval, Quebec City, QC, Canada  
11  
12

13 <sup>9</sup> School of Health Sciences (HESAV), HES-SO University of Applied Sciences and Arts Western  
14 Switzerland Lausanne.  
15  
16

17 <sup>10</sup> Department of Family Medicine, McGill University, Montréal, Canada  
18  
19  
20  
21  
22  
23

24 Correspondence to

25  
26 Pr Marie-Pierre Gagnon; [marie-pierre.gagnon@fsi.ulaval.ca](mailto:marie-pierre.gagnon@fsi.ulaval.ca)  
27  
28  
29  
30  
31  
32  
33  
34  
35  
36  
37  
38  
39  
40  
41  
42  
43  
44  
45  
46  
47  
48  
49  
50  
51  
52  
53  
54  
55  
56  
57  
58  
59  
60

## Abstract

**Introduction** Multimorbidity increases care needs and primary care use among people with chronic diseases. The Concerto Health Program (CHP) has been developed to optimize chronic disease management in primary care services. However, in its current version, the CHP primarily targets clinicians and does not aim to answer directly patients' and their informal caregivers' needs for chronic disease management. Various studies have shown that interventions that increase patient activation level are associated with better health outcomes. Furthermore, educational tools must be adapted to patients and caregivers in terms of health literacy and usability. This project aims to develop, implement and evaluate a user-centered, multifunctional and personalized eHealth platform (CONCERTO+) to promote a more active patient role in chronic disease management and decision-making.

1  
2  
3 **Methods and analysis** This project uses a collaborative research approach,  
4  
5  
6  
7 aiming at the personalization of CHP through 3 phases: 1) the development of  
8  
9  
10  
11 one module of an eHealth platform combining scientific evidence and user-  
12  
13  
14 centered design; 2) a feasibility study of CONCERTO+ through a pilot cluster  
15  
16  
17 randomized controlled trial where patients with chronic disease from a primary  
18  
19  
20  
21  
22  
23 healthcare practice will receive CONCERTO+ during 6 months and be compared  
24  
25  
26 to patients from a control practice receiving usual care; and 3) an analysis of  
27  
28  
29  
30 CONCERTO+ potential for scaling up. To do so, we will conduct two focus  
31  
32  
33  
34 groups with patients and informal caregivers and individual interviews with health  
35  
36  
37 professionals at the two study sites, as well as health care managers, information  
38  
39  
40  
41 officers and representatives of the Ministry of Health.  
42  
43  
44  
45  
46  
47  
48  
49

50 **Ethics and dissemination** This study received ethical approval from Ethics  
51  
52  
53  
54  
55  
56  
57  
58  
59  
60  
Committee of Université Laval. The findings will be used to inform the



1  
2  
3 effectiveness of CONCERTO+ to improve management care in chronic disease.  
4  
5

6  
7 We will disseminate findings through presentations in scientific conferences and  
8  
9  
10  
11 publication in peer reviewed journals.  
12  
13

14  
15  
16  
17  
18  
19  
20 **Trial registration:** Clinicaltrials.gov ID: NCT03628963  
21  
22

23  
24 **Keywords:** Chronic disease management, Multimorbidity, eHealth, Patient and  
25  
26  
27  
28  
29  
30  
31  
32  
33  
34  
35  
36  
37  
38  
39  
40  
41  
42  
43  
44  
45  
46  
47  
48  
49  
50  
51  
52  
53  
54  
55  
56  
57  
58  
59  
60  
caregiver engagement, Health literacy, User-centered design.

#### Strengths and limitations of this study

- The design of a user-centered technological solution is adapted to

1  
2  
3  
4 chronic disease patients' needs and their literacy level.  
5  
6  
7

- 8
- 9 • The inclusion of informal caregivers in the use of CONCERTO+ is a  
10  
11 novelty.  
12
  - 13 • The pilot test will provide data for feasibility, acceptability and usefulness  
14  
15 of CONCERTO+.  
16  
17
  - 18 • Good potential for sustainability given that it will be implemented in the  
19  
20 real context of primary care practice with the collaboration of clinical  
21  
22 teams.  
23  
24
  - 25 • As a limitation, this project seems ambitious for its entire achievement  
26  
27 in two years.  
28  
29  
30  
31  
32  
33  
34  
35  
36  
37  
38  
39  
40  
41  
42  
43  
44  
45  
46  
47  
48  
49  
50  
51  
52  
53  
54  
55  
56  
57  
58  
59  
60

## Introduction

## Background

Chronic diseases are the number one cause of mortality in the world, and account for nearly 70% of deaths [1]. In Canada and around the world, multimorbidity, which means people who have more than two chronic diseases, is increasing [2]. In addition to often making life more difficult for people living with these conditions, the rise in multimorbidity is putting pressure on the Canadian healthcare system and causing over-consumption of care and services [3]. In the Province of Quebec, 45% of people aged 20 and over have more than two chronic diseases [4], and 80% of chronic disease consultations are done in primary health care services [5].

1  
2  
3  
4 Multimorbidity increases care needs as well as the complexity of health care  
5  
6  
7 services required in primary care, especially when it comes to applying  
8  
9  
10  
11 recommendations for good clinical practices [5]. The total cost of the six most  
12  
13  
14 common chronic diseases in Quebec (ischemic heart disease, cerebrovascular  
15  
16  
17 disease, chronic obstructive pulmonary disease, cancer, hypertension and  
18  
19 diabetes) has been estimated at 8, 1 billion Canadian dollars, and this may rise up  
20  
21  
22 to 13 billion in 2030 if no substantial change is made [6].  
23  
24  
25  
26  
27  
28  
29

30  
31 In Quebec, primary care services have the main responsibility to support people  
32  
33  
34 with chronic diseases and their informal caregivers, jointly with other stakeholders  
35  
36  
37 of the local health network [7, 8]. However, primary care services suffer from many  
38  
39  
40 challenges and organizational constraints, in particular, the difficulty of access –  
41  
42  
43  
44  
45 with a large proportion of Quebecers without a family doctor – and the wait times  
46  
47  
48 that are among the longest in Canada [9, 10]. Furthermore, the fragmentation of  
49  
50  
51  
52  
53 health care processes and the gaps in information transfer are recognized sources  
54  
55  
56  
57  
58  
59  
60

1  
2  
3 of inefficiency, that make critical the integration and continuity of care for chronic  
4  
5  
6  
7 diseases [7, 11]. To overcome these issues, many approaches linking healthcare  
8  
9  
10  
11 providers, patients, caregivers and the organization of health care services are  
12  
13  
14 promoted [12]. The central role of patients in the management of their disease,  
15  
16  
17 which depends on their active involvement, is recognized as a key component in  
18  
19  
20  
21  
22 chronic disease management [13].  
23  
24  
25

26  
27 Active patient involvement requires that patients have the knowledge, skills and  
28  
29  
30 self-confidence to manage their health and healthcare [14]. Various studies have  
31  
32  
33  
34 shown that interventions increasing patient activation level are associated with  
35  
36  
37  
38 better health outcomes [15-22] and decreased costs [23]. However, active patient  
39  
40  
41 involvement and the quality of the interactions with health providers will partially  
42  
43  
44  
45 depend on patient's knowledge of the disease and the needed care, in addition to  
46  
47  
48  
49 their interpersonal skills as well as their ability to communicate their expectations,  
50  
51  
52  
53 needs and preferences to their healthcare team [24, 25]. It is therefore important  
54  
55  
56  
57  
58  
59  
60

1  
2  
3 to offer patients and caregivers relevant information adapted to their health literacy  
4  
5  
6  
7 level. According the following definition, “Health literacy is linked to literacy and  
8  
9  
10 entails people’s knowledge, motivation and competences to access, understand,  
11  
12  
13  
14 appraise and apply health information in order to make judgements and take  
15  
16  
17  
18 decisions in everyday life concerning health care, disease prevention and health  
19  
20  
21  
22 promotion to maintain or improve quality of life during the life course” [26]. For their  
23  
24  
25  
26 part, health professionals must also have the communicational and interpersonal  
27  
28  
29  
30 skills required to work in a team and share information appropriately with patients  
31  
32  
33  
34 in order to support their active involvement [24]. Thus, it becomes important to act  
35  
36  
37  
38 in advance by supporting patients’ autonomy and involvement in the care dynamic,  
39  
40  
41  
42 and by promoting informational and educational relationships in disease  
43  
44  
45 management [25-27]. Therefore, it is crucial that information and educational tools  
46  
47  
48  
49 are adapted to patients and caregivers in terms of literacy level and presentation  
50  
51  
52 [28-30].  
53  
54  
55  
56  
57  
58  
59  
60

1  
2  
3 eHealth technologies offer a potential to support chronic disease management.  
4  
5

6  
7 Some studies have shown positive effects on clinical processes (better adherence  
8  
9  
10  
11 to care protocol, reduced errors and improved monitoring and callback rates), on  
12  
13  
14  
15 quality of care and effectiveness, and on patient outcomes [31-36].  
16  
17

18  
19 Systematic reviews support the role of electronic personal health records and  
20  
21  
22  
23 electronic portals allowing patient access to their health records in order to promote  
24  
25  
26  
27 their active participation in their care [37-39]. However, to achieve expected  
28  
29  
30  
31 outcomes, eHealth technologies should first be adopted and used in an appropriate  
32  
33  
34  
35 manner by patients and health professionals [40]. Therefore, end-user involvement  
36  
37  
38  
39 in the development of eHealth solutions is an imperative [41]. Moreover, eHealth  
40  
41  
42  
43 literacy, which is inspired by the health literacy concept but focuses specifically on  
44  
45  
46  
47 optimal eHealth solutions use, should be considered in order to ensure that the  
48  
49  
50  
51 solutions are adapted to the capabilities of targeted users [30, 42]. While the  
52  
53  
54  
55  
56  
57  
58  
59  
60 number of eHealth solutions continues to increase, with more than 325,000 mobile

1  
2  
3 health applications in 2017 [43], the majority of them (53%) are used by less than  
4  
5  
6  
7 5,000 people and are often abandoned after a short trial period [44-46]. User  
8  
9  
10 involvement – including patients, informal caregivers and health professionals – is  
11  
12  
13 identified to be among the conditions to ensure that eHealth solutions have a real  
14  
15  
16 impact. Thus, all these stakeholders must be involved throughout the different  
17  
18  
19 stages of technology development, from conception to assessment [47]. Based on  
20  
21  
22 efficient chronic care models, high-potential technologies and patient involvement  
23  
24  
25 as active partner of their care, we suggest to develop an innovative and mobilizing  
26  
27  
28 project in order to improve patient care and experience.  
29  
30  
31  
32  
33  
34  
35  
36  
37

## 38 Methods and analysis:

39  
40  
41  
42  
43 The following methods adhere to the Standard Protocol Items Recommendations  
44  
45  
46  
47 for Interventional Trials (SPIRIT) guidelines for the reporting of study protocols.  
48  
49  
50  
51  
52  
53  
54  
55  
56  
57  
58  
59  
60



1  
2  
3  
4 This project is a collaborative work involving IT developers from CHP, designers,  
5  
6  
7 clinicians, technological partners and patient representatives. The aim is to  
8  
9  
10 develop, implement and evaluate a module of a multifunctional and personalized  
11  
12  
13 eHealth platform, CONCERTO+, through a pilot study for optimizing patient active  
14  
15  
16 role in medical follow-up, decision-making, satisfaction towards healthcare  
17  
18  
19 services and quality of life. The specific objectives are to: 1) develop a module of a  
20  
21  
22 multifunctional and personalized eHealth platform integrated to the CHP for  
23  
24  
25 patients and caregivers allowing them to engage in the follow-up and management  
26  
27  
28 of their chronic diseases; 2) test the integration of CONCERTO+ in monitoring care  
29  
30  
31 pathways of three frequent co-existing chronic diseases (diabetes, hypertension,  
32  
33  
34 dyslipidemia) and assess the usefulness and acceptability of the solution for  
35  
36  
37 patients with chronic diseases and their caregivers; 3) assess the scalability of the  
38  
39  
40  
41  
42  
43  
44  
45  
46  
47  
48  
49 CONCERTO+ solution.

## 50 51 52 53 Phase 1: Development of the eHealth solution module 54 55 56 57 58 59 60

1  
2  
3 We will conduct a rapid literature review on the effects of eHealth interventions for  
4  
5  
6  
7 supporting active involvement of patients with chronic diseases in their primary  
8  
9  
10  
11 care team. For this purpose, we will follow the rapid review method suggested by  
12  
13  
14 Lawani et al. [48] and consider the latest evidence on eHealth interventions for  
15  
16  
17  
18 chronic diseases monitoring and care. We will consider the following “Problem,  
19  
20  
21  
22 Intervention, Comparison, Outcomes (PICO)” elements: (P): three targeted chronic  
23  
24  
25  
26 diseases (diabetes, high blood pressure, dyslipidemia), alone or combined; (I) all  
27  
28  
29 eHealth interventions implemented in primary care and that directly involve patients  
30  
31  
32  
33 (e.g. Electronic Medical Records, patient diary, patient portal, specific  
34  
35  
36  
37 computerized monitoring for a chronic disease and technological interventions  
38  
39  
40  
41 focused on lifestyle modifications; (C): routine follow-up; (O): Health outcomes  
42  
43  
44  
45 specific to the disease (e.g. HbA1c for diabetes), generic health outcomes (e.g.  
46  
47  
48  
49 mortality, quality of life), patient outcomes (e.g. involvement, personal efficacy) and  
50  
51  
52  
53 practices and process outcomes (e.g. test numbers, emergency visits,  
54  
55  
56  
57  
58  
59  
60

1  
2  
3 hospitalizations). First, we will start to consult existing systematic reviews, in  
4  
5  
6  
7 particular that of Irizarry et al. [38], and a review of reviews that we have already  
8  
9  
10  
11 completed [49]. We will also document issues relating to needs, expectations and  
12  
13  
14 concerns in terms of eHealth solutions for patients, their informal caregivers, and  
15  
16  
17 health care providers. This information will provide evidence summaries describing  
18  
19  
20 each eHealth solution associated with each targeted health issues, as well as  
21  
22  
23 information on the risks and benefits of these solutions. We will then use the  
24  
25  
26 methods suggested by Giguère et al. [50] to develop Decision Boxes to involve  
27  
28  
29 patients and their informal caregivers in the choice of functionalities and contents  
30  
31  
32 to develop in the CONCERTO+ solution, in line with an integrated care system (**Fig.**  
33  
34  
35  
36  
37  
38  
39  
40  
41 **1**).  
42  
43  
44

45 A first prototype will be developed by the design and technology teams, in close  
46  
47  
48 collaboration with researchers, health professionals and patient representatives  
49  
50  
51 who will identify the functionalities to include in the CONCERTO+ solution. Given  
52  
53  
54  
55  
56  
57  
58  
59  
60

1  
2  
3 the time limit of the project, we will classify the required functionalities in 3 types:  
4  
5

6  
7 1) essential and priority; 2) important but not priority; 3) required in the future.  
8  
9

10 For the development of the eHealth platform module, a user-centered approach  
11  
12

13  
14 will be used, based on three cycles with users. Iterative testing sessions will take  
15  
16

17  
18 place at the usability laboratory of UL lead by HW, providing all the equipment  
19  
20

21  
22 needed to conduct usability studies. Students in graphic and interaction design,  
23  
24

25  
26 under the direction of three experts from the School of Design of UL (EK, FLP, JR),  
27  
28

29  
30 will participate in the development of the platform's visual environment. An expert  
31  
32

33  
34 in eHealth literacy (CD) will ensure that contents of the clinical monitoring tools  
35  
36

37  
38 already integrated in the CHP are adapted to a general audience according to  
39  
40

41  
42 recommendations of the Health Literacy Guide [51], in addition of tools that provide  
43  
44

45  
46 understandable information (e.g link to a popular glossary of medical terms:  
47  
48

49 [https://publications.santemontreal.qc.ca/uploads/tx\\_asssmpublications/litteratie\\_v](https://publications.santemontreal.qc.ca/uploads/tx_asssmpublications/litteratie_v)  
50

51  
52 [9.pdf](#)).  
53  
54  
55  
56  
57  
58  
59  
60

1  
2  
3  
4 The integration of the CONCERTO+ solution with the CHP will be ensured by the  
5  
6  
7 Concerto Health Group team who will work closely with the designers and  
8  
9  
10  
11 researchers. Health professionals in primary care services from the sites  
12  
13  
14  
15 participating in the pilot project will also be consulted to validate the match between  
16  
17  
18 the CONCERTO + solution and care pathways for professionals offered by the  
19  
20  
21  
22 CHP.  
23  
24  
25

## 26 Patient and Public Involvement

27  
28  
29  
30

31 A patient partner (informal caregiver) is involved as research partner at key stages  
32  
33  
34 of the study. His experience in caring of a patient with diabetes informed us on  
35  
36  
37  
38 needs of patients, research focus, methods for collecting data for the study and  
39  
40  
41  
42 dissemination strategy through patient and citizen groups associations.  
43  
44  
45

46 Our patient partner is invited at each research team meeting to make sure that the  
47  
48  
49  
50 research questions are aligned with patients' needs. He gives his input in refining  
51  
52  
53  
54  
55  
56  
57  
58  
59  
60

1  
2  
3 the focus of the research questions. He made valuable contributions in the design  
4  
5  
6  
7 of the study.  
8  
9

10  
11 In the first step of the study, the development of the first prototype, our patient  
12  
13  
14  
15 partner helped us to recruit patients by sharing the invitation through his personal  
16  
17  
18  
19 contacts and network and gave feedback for the pros and cons of the prototype  
20  
21  
22  
23 development. He was also invited to contribute in editing the paper and is  
24  
25  
26  
27 considered as a coauthor.  
28  
29  
30

31 To develop our dissemination strategy, we will review the results with the patient  
32  
33  
34  
35 partner and integrate his feedback to ensure that we presented the results in the  
36  
37  
38  
39 most effective way for the general populations. We will send a summary of the  
40  
41  
42  
43 research results to study participants who have provided their mailing address in  
44  
45  
46  
47 the consent form and we will also organise events for patients and citizen groups  
48  
49  
50  
51 and associations, such as outreach communications and scientific café.  
52  
53  
54  
55  
56  
57  
58  
59  
60

1  
2  
3 In this study, participants will assess the burden of the intervention by  
4  
5  
6  
7 participating in focus groups.  
8  
9

## 10 11 Phase 2: Pilot cluster randomized clinical trial 12 13

14  
15  
16 The Phase 2 of the project will consist in a feasibility study based on a pilot cluster  
17  
18 randomized clinical trial (c-RCT). Given the nature of the intervention, patients with  
19  
20 chronic diseases are followed by a small team of primary care clinicians.  
21  
22  
23  
24  
25  
26  
27  
28  
29  
30  
31  
32

### 33 *Study setting* 34 35 36 37

38 The study will be conducted in two Family Medicine Groups (FMG) from the same  
39  
40 health region (in the province of Quebec) but covering distinct areas, they have  
41  
42 been selected as the clusters.  
43  
44  
45  
46  
47  
48  
49

### 50 *Eligibility criteria* 51 52 53 54 55 56 57 58 59 60

1  
2  
3 Patients with two or more targeted chronic diseases (diabetes, hypertension,  
4  
5  
6  
7 dyslipidemia) and who had three or more visits in the last 12 months will be eligible.  
8  
9

10  
11 Adults whose legal incompetence has been established by a court are not eligible.  
12  
13

### 14 ***Intervention***

15  
16  
17  
18  
19 The intervention is the device CONCERTO+, a user-centered, multifunctional and  
20  
21  
22  
23  
24 personalized eHealth platform. Both groups, experimental and control, have the  
25  
26  
27 same criteria with respect to participant eligibility. Experimental group from FMG 1  
28  
29  
30  
31 will use CONCERTO+ application during 6 months. Control group from FMG 2 will  
32  
33  
34  
35 not use the application CONCERTO+ but continue to receive usual care. The  
36  
37  
38  
39 objective is to assess the feasibility, acceptability and potential effectiveness of the  
40  
41  
42  
43 device CONCERTO+.  
44  
45  
46

### 47 ***Outcomes***

48  
49  
50  
51 Patient involvement in their care following the use of CONCERTO+ will be our  
52  
53  
54  
55 primary outcome of interest. We will use Patient Activation Measure (PAM) [52]  
56  
57  
58  
59



1  
2  
3 which is built on patient knowledge, skills and confidence that are directly targeted  
4  
5  
6  
7 by the intervention.  
8  
9

10  
11 The score of the activation level obtained (between 0 and 100) shows the degree  
12  
13 of ability to manage their health with confidence according to the following scale  
14  
15 ranges: strongly disagree = 1; disagree = 2; agree = 3; strongly agree = 4. Patients  
16  
17 with a higher activation level are likely to have better health outcomes. Patients  
18  
19 answer to a survey of 13 questions with the following scoring for each answer:  
20  
21  
22  
23  
24  
25  
26  
27  
28  
29  
30

- 31 1. Not believing that activation is important ( $\leq 47$ )
- 32  
33 2. Lack of knowledge or confidence to take action (47.1 - 55.1)
- 34  
35  
36  
37 3. Beginning to take action (55.2 - 67)
- 38  
39  
40  
41 4. Taking action ( $\geq 67.1$ ).
- 42  
43  
44  
45  
46  
47  
48

49 The PAM 13 questionnaire has been validated in French. We will ask a license to  
50  
51 use, which is free for up to 250 patients in an academic research context [53]. The  
52  
53  
54  
55  
56  
57  
58  
59  
60

1  
2  
3 survey will be completed by participants of the two groups at baseline, and six  
4  
5  
6  
7 months later. This period of CONCERTO+ use is enough to achieve the intended  
8  
9  
10  
11 outcomes.

12  
13  
14  
15 Secondary outcomes of interest are: 1) Impacts of CONCERTO+ use on process  
16  
17  
18  
19 indicators and care outcomes, measured with questions adapted from Glasgow et  
20  
21  
22  
23 al. [54] and validated in the previous Concerto Health Program (CHP) assessment.

24  
25  
26 To measure these outcomes, patients will answer to a questionnaire after six  
27  
28  
29  
30 months use of CONCERTO+. This questionnaire comprises 5 scales based on the  
31  
32  
33  
34 key components of CONCERTO+ and covering the following dimensions: solving-  
35  
36  
37  
38 problems/advices, delivery system design/decision support, goal setting/tailoring,  
39  
40  
41  
42 follow-up / coordination, overall care. Items are scored on a 5-point scale with the  
43  
44  
45  
46 following values: 1 (Almost never); 2 (Generally not); 3 (Sometimes); 4 (Most of the  
47  
48  
49  
50 time); 5 (Almost always). For each scale, higher scores are expected to be  
51  
52  
53 associated with better care outcomes.

1  
2  
3  
4 2) The acceptability of the device CONCERTO+ will be assessed by patients and  
5  
6  
7 informal caregivers, at the end of the intervention with:  
8  
9

10  
11 1. A short survey adapted from the Technology Acceptance Model [55] that  
12  
13 includes 3 criteria (perceived ease of use, perceived usefulness, behavioral  
14  
15 intention to use) with the following scoring: Strongly disagree = 1; Disagree = 2;  
16  
17 Agree = 3; strongly agree = 4. Higher scores indicate a better acceptance of the  
18  
19 use of CONCERTO+.  
20  
21  
22  
23  
24  
25  
26  
27  
28

29  
30 2. The use of CONCERTO+ that will be measured by logs (numbers of tests  
31  
32 ordered, emergency visits, and hospitalizations). (See **Supplementary File 1,**  
33  
34  
35  
36  
37  
38 2).  
39  
40  
41

### 42 *Participant timeline*

43  
44  
45  
46

47 **Table 1** shows the distribution of outcomes measures through time. The first survey  
48  
49  
50 will be completed at baseline and six months after the use of CONCERTO+, in  
51  
52  
53  
54  
55  
56  
57  
58  
59  
60

1  
2  
3 order to see the effects of the use of CONCERTO+ during the process of care. The  
4  
5  
6  
7 second survey will be completed six months after in order to assess the effects of  
8  
9  
10  
11 the use of CONCERTO+, and the third survey will be completed by patients and  
12  
13  
14  
15 informal caregivers after the intervention in order to assess its acceptability.  
16  
17  
18  
19  
20  
21  
22  
23  
24  
25  
26  
27  
28  
29  
30  
31  
32  
33  
34  
35  
36  
37  
38  
39  
40  
41  
42  
43  
44  
45  
46  
47  
48  
49  
50  
51  
52  
53  
54  
55  
56  
57  
58  
59  
60

Table 1 Distribution of outcomes measures through time

|                                                                               | Study period                                                                         |                     |                                                |                                                                    |
|-------------------------------------------------------------------------------|--------------------------------------------------------------------------------------|---------------------|------------------------------------------------|--------------------------------------------------------------------|
|                                                                               | Allocation<br>out                                                                    | Post allocation     | Post allocation                                | Close                                                              |
| Time point                                                                    | -T1                                                                                  | T1<br>(at baseline) | T2<br>(6 months after the<br>use of Concerto+) | T3:<br>During 3 months<br>following the end of<br>the intervention |
|                                                                               | <b>Enrolment</b><br>- Eligibility<br>screen<br>- informed<br>consent<br>- Allocation |                     |                                                |                                                                    |
| Intervention group                                                            | ✓                                                                                    | ✓                   | ✓                                              | ✓                                                                  |
| Usual care group                                                              | ✓                                                                                    |                     |                                                |                                                                    |
| <b>Assessments</b>                                                            |                                                                                      |                     |                                                |                                                                    |
| Main outcome<br>measure:<br>PAM measure                                       |                                                                                      | ✓                   | ✓                                              |                                                                    |
| Secondary<br>outcome<br>measure:<br>Survey adapted<br>from Glasgow and<br>al. |                                                                                      |                     | ✓                                              |                                                                    |
| Technology<br>Acceptance Model                                                |                                                                                      |                     | ✓                                              |                                                                    |
|                                                                               |                                                                                      |                     |                                                |                                                                    |

1  
2  
3  
4  
5  
6  
7  
8  
9  
10  
11  
12  
13  
14  
15  
16  
17  
18  
19  
20  
21  
22  
23  
24  
25  
26  
27  
28  
29  
30  
31  
32  
33  
34  
35  
36  
37  
38  
39  
40  
41  
42  
43  
44  
45  
46  
47  
48  
49  
50  
51  
52  
53  
54  
55  
56  
57  
58  
59  
60

|               |  |  |   |   |
|---------------|--|--|---|---|
| Logs measures |  |  | ✓ |   |
| Focus groups  |  |  |   | ✓ |
| Interviews    |  |  |   | ✓ |

For peer review only

### ***Sample size calculation***

Based on a similar study [56], a sample of 200 patients is enough to detect a difference of 2 points on the PAM score, with a power of 90% and an alpha of 0.05.

Indeed, the assessment of online education intervention to chronic disease patients, showed a significant difference of 6 points on the PAM score in the experimental group (n = 58), whereas the difference was not significant in the control group (n = 68) [56]. Such a difference may be considered clinically significant because each additional point on the PAM score is associated with a 2% decrease in hospitalizations [53]. Considering an attrition rate of 15%, the sample size should remain relevant to detect a difference of at least 2 points on the PAM score, as differences reported in similar studies range from 2.5 to 6.5 points [14].

### ***Recruitment strategy***

1  
2  
3 For the Phase 1, the development of the eHealth solution module, we will recruit 7  
4  
5  
6  
7 to 10 patients and informal caregivers from convenience samples of volunteers  
8  
9  
10  
11 joined through patient associations and mailing lists of our institution (Université  
12  
13  
14 Laval-UL). Eligible individuals will meet the following criteria: 1) have one or more  
15  
16  
17  
18 targeted chronic diseases (diabetes, hypertension, dyslipidemia); 2) had three or  
19  
20  
21  
22 more medical visits in the last 12 months; 3) are 18 years old and over; 4) reside  
23  
24  
25  
26 in the greater Quebec area; 5) have an interest in technology; 6) are able to speak  
27  
28  
29  
30 and read in French; 7) are available to participate in three validation sessions.  
31  
32

33  
34 For the Phase 2, the pilot cluster randomized clinical trial, a note will be added in  
35  
36  
37 the EMR (electronic medical record) of patients who had been preselected, and at  
38  
39  
40  
41 their next visit at the FMG, the receptionist will give them an information sheet about  
42  
43  
44  
45 the study to invite them to participate. Interested patients will be invited to call the  
46  
47  
48  
49 research assistant using a toll free number or to leave their contact information to  
50  
51  
52  
53 the receptionist who will forward them to the research assistant. Then, patients will  
54  
55  
56  
57  
58  
59  
60



1  
2  
3 be contacted by the research assistant to validate their eligibility and confirm their  
4  
5  
6  
7 interest. Recruitment will end when 100 patients are recruited from each site. We  
8  
9  
10 will ensure an equal distribution of participants according to their sex, and we will  
11  
12  
13 consider specific aspects in patient recruitment, particularly living alone, the  
14  
15  
16 presence of dependents and their literacy level. The recruitment chart is presented  
17  
18  
19  
20  
21  
22 in Fig. 2  
23  
24  
25

### 26 *Allocation*

27  
28  
29  
30 Patient will be selected randomly with the help of the participating FMG by  
31  
32  
33 searching the local EMR system. A pre-selection of patients will be done by the  
34  
35  
36  
37 four nurses involved in chronic disease care at the participating FMG. For each  
38  
39  
40  
41 site, a sample of 200 patients (see sample size calculation) stratified by sex, age  
42  
43  
44  
45 group and number of chronic diseases, will be randomly preselected by a  
46  
47  
48  
49  
50  
51  
52  
53  
54  
55  
56  
57  
58  
59  
60  
61  
62  
63  
64  
65  
66  
67  
68  
69  
70  
71  
72  
73  
74  
75  
76  
77  
78  
79  
80  
81  
82  
83  
84  
85  
86  
87  
88  
89  
90  
91  
92  
93  
94  
95  
96  
97  
98  
99  
100  
101  
102  
103  
104  
105  
106  
107  
108  
109  
110  
111  
112  
113  
114  
115  
116  
117  
118  
119  
120  
121  
122  
123  
124  
125  
126  
127  
128  
129  
130  
131  
132  
133  
134  
135  
136  
137  
138  
139  
140  
141  
142  
143  
144  
145  
146  
147  
148  
149  
150  
151  
152  
153  
154  
155  
156  
157  
158  
159  
160  
161  
162  
163  
164  
165  
166  
167  
168  
169  
170  
171  
172  
173  
174  
175  
176  
177  
178  
179  
180  
181  
182  
183  
184  
185  
186  
187  
188  
189  
190  
191  
192  
193  
194  
195  
196  
197  
198  
199  
200  
201  
202  
203  
204  
205  
206  
207  
208  
209  
210  
211  
212  
213  
214  
215  
216  
217  
218  
219  
220  
221  
222  
223  
224  
225  
226  
227  
228  
229  
230  
231  
232  
233  
234  
235  
236  
237  
238  
239  
240  
241  
242  
243  
244  
245  
246  
247  
248  
249  
250  
251  
252  
253  
254  
255  
256  
257  
258  
259  
260  
261  
262  
263  
264  
265  
266  
267  
268  
269  
270  
271  
272  
273  
274  
275  
276  
277  
278  
279  
280  
281  
282  
283  
284  
285  
286  
287  
288  
289  
290  
291  
292  
293  
294  
295  
296  
297  
298  
299  
300  
301  
302  
303  
304  
305  
306  
307  
308  
309  
310  
311  
312  
313  
314  
315  
316  
317  
318  
319  
320  
321  
322  
323  
324  
325  
326  
327  
328  
329  
330  
331  
332  
333  
334  
335  
336  
337  
338  
339  
340  
341  
342  
343  
344  
345  
346  
347  
348  
349  
350  
351  
352  
353  
354  
355  
356  
357  
358  
359  
360  
361  
362  
363  
364  
365  
366  
367  
368  
369  
370  
371  
372  
373  
374  
375  
376  
377  
378  
379  
380  
381  
382  
383  
384  
385  
386  
387  
388  
389  
390  
391  
392  
393  
394  
395  
396  
397  
398  
399  
400  
401  
402  
403  
404  
405  
406  
407  
408  
409  
410  
411  
412  
413  
414  
415  
416  
417  
418  
419  
420  
421  
422  
423  
424  
425  
426  
427  
428  
429  
430  
431  
432  
433  
434  
435  
436  
437  
438  
439  
440  
441  
442  
443  
444  
445  
446  
447  
448  
449  
450  
451  
452  
453  
454  
455  
456  
457  
458  
459  
460  
461  
462  
463  
464  
465  
466  
467  
468  
469  
470  
471  
472  
473  
474  
475  
476  
477  
478  
479  
480  
481  
482  
483  
484  
485  
486  
487  
488  
489  
490  
491  
492  
493  
494  
495  
496  
497  
498  
499  
500  
501  
502  
503  
504  
505  
506  
507  
508  
509  
510  
511  
512  
513  
514  
515  
516  
517  
518  
519  
520  
521  
522  
523  
524  
525  
526  
527  
528  
529  
530  
531  
532  
533  
534  
535  
536  
537  
538  
539  
540  
541  
542  
543  
544  
545  
546  
547  
548  
549  
550  
551  
552  
553  
554  
555  
556  
557  
558  
559  
560  
561  
562  
563  
564  
565  
566  
567  
568  
569  
570  
571  
572  
573  
574  
575  
576  
577  
578  
579  
580  
581  
582  
583  
584  
585  
586  
587  
588  
589  
590  
591  
592  
593  
594  
595  
596  
597  
598  
599  
600  
601  
602  
603  
604  
605  
606  
607  
608  
609  
610  
611  
612  
613  
614  
615  
616  
617  
618  
619  
620  
621  
622  
623  
624  
625  
626  
627  
628  
629  
630  
631  
632  
633  
634  
635  
636  
637  
638  
639  
640  
641  
642  
643  
644  
645  
646  
647  
648  
649  
650  
651  
652  
653  
654  
655  
656  
657  
658  
659  
660  
661  
662  
663  
664  
665  
666  
667  
668  
669  
670  
671  
672  
673  
674  
675  
676  
677  
678  
679  
680  
681  
682  
683  
684  
685  
686  
687  
688  
689  
690  
691  
692  
693  
694  
695  
696  
697  
698  
699  
700  
701  
702  
703  
704  
705  
706  
707  
708  
709  
710  
711  
712  
713  
714  
715  
716  
717  
718  
719  
720  
721  
722  
723  
724  
725  
726  
727  
728  
729  
730  
731  
732  
733  
734  
735  
736  
737  
738  
739  
740  
741  
742  
743  
744  
745  
746  
747  
748  
749  
750  
751  
752  
753  
754  
755  
756  
757  
758  
759  
760  
761  
762  
763  
764  
765  
766  
767  
768  
769  
770  
771  
772  
773  
774  
775  
776  
777  
778  
779  
780  
781  
782  
783  
784  
785  
786  
787  
788  
789  
790  
791  
792  
793  
794  
795  
796  
797  
798  
799  
800  
801  
802  
803  
804  
805  
806  
807  
808  
809  
810  
811  
812  
813  
814  
815  
816  
817  
818  
819  
820  
821  
822  
823  
824  
825  
826  
827  
828  
829  
830  
831  
832  
833  
834  
835  
836  
837  
838  
839  
840  
841  
842  
843  
844  
845  
846  
847  
848  
849  
850  
851  
852  
853  
854  
855  
856  
857  
858  
859  
860  
861  
862  
863  
864  
865  
866  
867  
868  
869  
870  
871  
872  
873  
874  
875  
876  
877  
878  
879  
880  
881  
882  
883  
884  
885  
886  
887  
888  
889  
890  
891  
892  
893  
894  
895  
896  
897  
898  
899  
900  
901  
902  
903  
904  
905  
906  
907  
908  
909  
910  
911  
912  
913  
914  
915  
916  
917  
918  
919  
920  
921  
922  
923  
924  
925  
926  
927  
928  
929  
930  
931  
932  
933  
934  
935  
936  
937  
938  
939  
940  
941  
942  
943  
944  
945  
946  
947  
948  
949  
950  
951  
952  
953  
954  
955  
956  
957  
958  
959  
960  
961  
962  
963  
964  
965  
966  
967  
968  
969  
970  
971  
972  
973  
974  
975  
976  
977  
978  
979  
980  
981  
982  
983  
984  
985  
986  
987  
988  
989  
990  
991  
992  
993  
994  
995  
996  
997  
998  
999  
1000

1  
2  
3 FMG in the presence of a research team member.  
4  
5  
6  
7

### 8 *Blinding* 9

10  
11  
12 Given the nature of the intervention, participating patients and healthcare providers  
13  
14 cannot be blinded, but the outcome assessor will be blinded to participant  
15  
16  
17  
18 assignment.  
19  
20  
21  
22  
23  
24

### 25 Phase 3: Scaling-up potential of the solution 26 27 28

29 For Phase 3, the analysis of CONCERTO+ potential for scaling-up will be done by  
30  
31  
32 documenting factors and conditions associated with the sustainability and scaling-  
33  
34 up of the solution. To do so, we will conduct: 1) two focus groups with patients and  
35  
36  
37 informal caregivers who participated in the study (1 with the experimental group  
38  
39  
40 and 1 with the control group, each group gathering between 8 and 12 participants);  
41  
42  
43  
44  
45 2) semi-structured individual interviews with health professionals as well as with  
46  
47  
48  
49  
50  
51  
52 health care managers, information officers, and representatives of the Ministry of  
53  
54  
55  
56  
57  
58  
59  
60

1  
2  
3 Health and Social Services will be conducted at the two study sites two FMG of  
4  
5  
6  
7 one region in the Province of Quebec). The number of interviews will be determined  
8  
9  
10  
11 according to the data saturation principle, but is estimated to be around 15  
12  
13  
14 participants in total. Interviews with patients, informal caregivers and health  
15  
16  
17  
18 professionals will include questions about factors facilitating or limiting sustained  
19  
20  
21  
22 use of the CONCERTO+ solution by patients and informal caregivers, and the  
23  
24  
25  
26 support of this use by health professionals, inspired by a recent study on personal  
27  
28  
29  
30 electronic health record [57, 58]. Questions for managers and decision-makers will  
31  
32  
33  
34 be based on Expand Net framework [59] that proposes 12 elements helping to  
35  
36  
37  
38 appreciate the potential of innovation expansion at different time of its progress  
39  
40  
41  
42 (see **Supplementary File 3,4**).

## 43 44 45 46 Data analysis plan

47  
48  
49  
50  
51 The study started in 2017 and will end in 2019. Data will be collected managed and  
52  
53  
54  
55 analysed at each step of the project. For the phase 1, we started to collect data in  
56  
57

1  
2  
3 October 2018; for the phase 2, we will start in April 2019 and the phase 3 will start  
4  
5  
6  
7 in November 2019. We will ensure that surveys are correctly completed in order to  
8  
9  
10  
11 avoid many missing data. Quantitative data will be analyzed using standard  
12  
13  
14 statistical tests such as ANOVA. We will compare the scores for repeated  
15  
16  
17 measurements between the two groups, controlling for the initial PAM score. We  
18  
19 will also make tests according to sex, literacy level and comorbidity because these  
20  
21  
22 variables are associated with the PAM score [60]. Focus groups discussions and  
23  
24  
25 interviews will be recorded with participants' consent, and the content will be  
26  
27  
28 transcribed verbatim. The qualitative analysis will consist in a thematic-pragmatic  
29  
30  
31 content analysis [61] using the NVivo 10 software. We will use an inductive-  
32  
33  
34 deductive analysis, in an iteratively and flexible way, which allows a hybrid  
35  
36  
37 codification from the conceptual dimensions of the model and the emergent themes  
38  
39  
40  
41  
42 [62]. We will verify the role of the identified dimension in the literature as the initial  
43  
44  
45  
46  
47  
48  
49  
50  
51  
52  
53 basis for analysis, while remaining open to the advent of other context-specific  
54  
55  
56  
57  
58  
59  
60

1  
2  
3 aspects. Findings from qualitative analyses will be triangulated with quantitative  
4  
5  
6  
7 data to see commonalities among participants' characteristics. We will compare  
8  
9  
10 intervention and control groups to judge the potential effectiveness of  
11  
12  
13 CONCERTO+ using process and care outcomes, and these results will inform the  
14  
15  
16 relevance of conducting a definitive trial to assess the effectiveness of  
17  
18  
19 CONCERTO+ for improving health outcomes. Participants will also be asked about  
20  
21  
22  
23 the usefulness of the CONCERTO+ solution in supporting their disease self-  
24  
25  
26  
27 management.  
28  
29  
30  
31  
32

## 33 Monitoring

34  
35  
36  
37  
38 A Data Monitoring Committee is not required for this study due to low risk of  
39  
40  
41  
42 adverse events. The principal investigator has the authority to suspend or terminate  
43  
44  
45  
46 the study at any time if any major problem occurs.  
47  
48  
49

## 50 Ethics and dissemination

1  
2  
3  
4 This study received ethical approval from the Research Ethics Committee of  
5  
6  
7 Université Laval; approval number: 2018-067 /01-06-2018 with all protocol  
8  
9  
10  
11 modifications being mandatory to report (see **Supplementary Files 5, 6**). All  
12  
13  
14 participants will provide their informed consent following a procedure approved by  
15  
16  
17 the ethics board (see **Supplementary Files 7-9**) before enrollment in the study. All  
18  
19  
20 data will be anonymized and will be used only for statistical research and analysis.  
21  
22  
23  
24  
25  
26 They will be securely stored on the server of Canadian Research Chair on  
27  
28  
29 Technologies and Practices in Health, we will never share it with third parties. Only  
30  
31  
32 the principal investigator, the research coordinator and eventually students who  
33  
34  
35 work on the project will have access on the list of participants in the different phases  
36  
37  
38 of the project. Data from EMR will be also anonymized by a medical secretary or a  
39  
40  
41 research assistant who will sign a confidentiality agreement. In addition, all team  
42  
43  
44 members will sign a confidentiality agreement so that any personal information of  
45  
46  
47  
48  
49 participants will not be shared.  
50  
51  
52  
53  
54  
55  
56  
57  
58  
59  
60

1  
2  
3  
4 In keeping with our participative approach and inspired by frameworks of  
5  
6  
7 collaboration between researchers and knowledge users [63, 64], knowledge  
8  
9  
10 translation will be done in an integrated way throughout the project, with an  
11  
12  
13 emphasis on collaboration, shared outcomes, and feedback from stakeholders at  
14  
15  
16 each step of the research. We will also share the outcomes through presentations  
17  
18  
19 in the networks and organizations of the team members, and through the  
20  
21  
22 production of dissemination tools for patient and citizen groups and associations.  
23  
24  
25 Ideally, these presentations will be done in tandem (patient-researcher; patient-  
26  
27  
28 clinician) in an interactive way, by taking the time for discussion and exchanges  
29  
30  
31 with the audience (e.g. lunch and learn, scientific café). The presentations will be  
32  
33  
34 supported with materials (brief reports, narrated slideshows, etc.) allowing a  
35  
36  
37 greater dissemination of the activities and outcomes. Knowledge translation  
38  
39  
40 activities at the end of project will consist of publishing outcomes in open access  
41  
42  
43  
44  
45  
46  
47  
48  
49  
50  
51  
52  
53  
54  
55  
56  
57  
58  
59  
60

1  
2  
3 peer reviewed journals. Presentations at national and international conferences in  
4  
5  
6  
7 health informatics, chronic diseases, and patient engagement are also scheduled.  
8  
9

## 10 11 12 13 14 15 16 17 Study status

18  
19  
20  
21  
22 This is an ongoing study taking place from December 2017 until December 2019.  
23  
24

25  
26 At the time of writing, the prototype of the eHealth technology module was designed  
27  
28  
29 and the first usability test was done.  
30  
31

## 32 33 34 Discussion

35  
36  
37  
38  
39  
40 This project shows a potential of success through the involvement of the  
41  
42  
43 technological partner who has a long collaborative experience with researchers.  
44  
45

46  
47 The eHealth solution is also likely to be acceptable because it will be adapted to  
48  
49  
50  
51 patient's needs, based on our user-centered approach and the adaptation of the  
52  
53  
54  
55 content to users' literacy level. Previous results associated with the use of the CHP  
56  
57  
58



1  
2  
3 solution for clinicians show promising preliminary outcomes based on validated  
4  
5  
6  
7 measures that are relevant and sensitive to the proposed intervention. The solution  
8  
9  
10  
11 has also a good potential for sustainability given that it will be implemented in the  
12  
13  
14 real context of primary care practice, with the collaboration of clinical teams. Finally,  
15  
16  
17 the project team is engaged in disseminating the results and pursuing the  
18  
19 development and adaptation of the CONCERTO+ solution in order to contribute to  
20  
21  
22  
23  
24  
25  
26 improving the health of people in Canada and internationally.  
27  
28  
29

## 30 31 List of abbreviations 32 33 34 35

36 **CHP:** Concerto Health Program  
37  
38

39  
40 **c-RCT:** cluster randomized clinical trial  
41  
42  
43

44 **EMR:** Electronic Medical Record  
45  
46  
47

48 **FMG:** Family medicine Group  
49  
50  
51

52  
53 **IT:** Information Technology  
54  
55  
56  
57  
58  
59  
60

1  
2  
3 **PAM:** Patient activation measure  
4  
5  
6

7 **PICO:** Problem, Intervention, Comparison-Outcomes  
8  
9  
10

11 **SPOR:** Strategy of Patient-Oriented Research  
12  
13  
14

15 **UL:** Université Laval  
16  
17  
18

## 19 20 21 List of figures 22 23 24

25  
26 Figure 1: Embedded healthcare system  
27  
28

29  
30 Figure 2: Recruitment flowchart  
31  
32  
33

## 34 35 References 36 37 38

39  
40 1. World Health Organization. WHO - Global status report on  
41  
42

43 noncommunicable diseases. 2014.  
44  
45

46  
47 [http://apps.who.int/iris/bitstream/handle/10665/148114/9789241564854\\_eng](http://apps.who.int/iris/bitstream/handle/10665/148114/9789241564854_eng)  
48  
49

50  
51 .pdf.  
52  
53  
54  
55  
56  
57  
58  
59  
60

- 1  
2  
3  
4  
5  
6  
7  
8  
9  
10  
11  
12  
13  
14  
15  
16  
17  
18  
19  
20  
21  
22  
23  
24  
25  
26  
27  
28  
29  
30  
31  
32  
33  
34  
35  
36  
37  
38  
39  
40  
41  
42  
43  
44  
45  
46  
47  
48  
49  
50  
51  
52  
53  
54  
55  
56  
57  
58  
59  
60  
2. Roberts KC, Rao DP, Bennett TL, Loukine L, Jayaraman GC. Prevalence and patterns of chronic disease multimorbidity and associated determinants in Canada. *Health Promot Chronic Dis Prev Can.* 2015;**35**:87-94.
3. Health Council of Canada. Helping patients help themselves: are Canadians with chronic conditions getting the Support they need to manage their health? 2010. [https://healthcouncilcanada.ca/files/2.17-AR1\\_HCC\\_Jan2010.pdf](https://healthcouncilcanada.ca/files/2.17-AR1_HCC_Jan2010.pdf)
4. Ruel, G. (2012). Multimorbidité : Ampleur, impacts et défi. In: *4e Rendez-vous des maladies chroniques*. Quebec: Institut national de santé publique du Québec (accessed 28 Apr 2017).

- 1  
2  
3  
4  
5  
6  
7  
8  
9 5. Fortin M, Contant E, Savard C, Hudon C, Poitras M-E, Almirall J. Canadian  
10  
11  
12 guidelines for clinical practice: an analysis of their quality and relevance to  
13  
14  
15  
16 the care of adults with comorbidity. *BMC Fam Pract*. 2011;**12**:74.  
17  
18  
19  
20  
21  
22  
23  
24  
25  
26 6. Bounajm F, Dinh T, Thériault L: Améliorer les habitudes de vie: des retombées  
27  
28  
29 importantes pour la santé et l'économie du Québec. 2017.  
30  
31  
32 <https://www.conferenceboard.ca/temp/7230eaa9-bb8f-43ae-8ecb>  
33  
34 [969e71c8c696/6647\\_SanteEtEconomieDuQuebec\\_RPT.pdf](https://www.conferenceboard.ca/temp/7230eaa9-bb8f-43ae-8ecb) (accessed 29  
35  
36  
37  
38  
39  
40  
41 May 2018).  
42  
43  
44  
45  
46  
47  
48 7. The Commissaire à la Santé et au Bien-Être. Adopting an integrated  
49  
50  
51  
52 approach to chronic disease prevention and management:  
53  
54  
55  
56  
57  
58  
59  
60

1  
2  
3  
4 recommendations, issues and implications, 2010.

5  
6  
7 <https://www.csbe.gouv.qc.ca/fileadmin/www/2010/MaladiesChroniques/CSB>

8  
9  
10  
11 E\_T4\_Recommandations2010.pdf

- 12  
13  
14  
15  
16  
17  
18  
19  
20  
21 8. Ministère de la Santé et des Services Sociaux. Cadre de référence pour la  
22  
23  
24 prévention et la gestion des maladies chroniques physiques en première

25  
26  
27  
28 ligne.2012. <http://publications.msss.gouv.qc.ca/msss/fichiers/2012/12-942->

29  
30  
31  
32 [01F.pdf](#)

- 33  
34  
35  
36  
37  
38  
39  
40  
41  
42 9. FMOQ, The Fédération des médecins omnipraticiens du Québec.

43  
44  
45  
46 Communiqué de la FMOQ: La FRMOQ lance une nouvelle campagne

47  
48  
49 publicitaire pour rappeler l'urgence d'investir en médecine familiale. (2011)

50  
51  
52  
53 Montréal.

- 1  
2  
3  
4  
5  
6  
7  
8 10. Bates-Eamer N, JL Ronson. Perceived shortage, relative surplus: the  
9  
10  
11 paradox of Quebec's Family physician workforce - An Intra- and  
12  
13  
14 Inter-Provincial Comparison, U.o.V. Centre for Global Studies, Editor. 2009.  
15  
16  
17  
18  
19  
20  
21  
22  
23  
24  
25 11. OCDE, The Organization for Economic Co-operation and Development:  
26  
27  
28 Promoting health, preventing disease, the economic case.  
29  
30  
31  
32 <https://www.oecd-ilibrary.org/docserver/9780335262274->  
33  
34  
35  
36 [en.pdf?expires=1535485524&id=id&accname=guest&checksum=37E5F5C](https://www.oecd-ilibrary.org/docserver/9780335262274-en.pdf?expires=1535485524&id=id&accname=guest&checksum=37E5F5C)  
37  
38  
39 [0D17CCC858CBF41B9E570C708](https://www.oecd-ilibrary.org/docserver/9780335262274-0D17CCC858CBF41B9E570C708). In The European Observatory on Health  
40  
41  
42  
43 Systems and Policies Series (2015). Accessed 28 August 2018.  
44  
45  
46  
47  
48  
49  
50  
51  
52  
53  
54  
55  
56  
57  
58  
59  
60

- 1  
2  
3  
4 12. Adams SG, Smith PK, Allan PF, Anzueto A, Pugh JA, Cornell JE. Systematic  
5  
6  
7 Review of the Chronic Care Model in Chronic Obstructive Pulmonary  
8  
9  
10  
11 Disease Prevention and Management. Arch Intern Med. 2007; **167**:551-61.  
12  
13  
14  
15 doi:10.1001/archinte.167.6.551  
16  
17  
18  
19  
20  
21  
22 13. Longtin Y, Sax H, Leape LL, Sheridan SE, Donaldson L, Pittet D. Patient  
23  
24  
25 participation: current knowledge and applicability to patient safety Mayo Clin  
26  
27 Proc. Elsevier. 2010 January;**85**:53-62.  
28  
29  
30  
31  
32  
33  
34  
35  
36  
37  
38  
39  
40 14. Hibbard JH, Greene J. What the evidence shows about patient activation:  
41  
42  
43 better health outcomes and care experiences; fewer data on costs. Health  
44  
45  
46  
47 affairs. 2013;**32**:207-214.  
48  
49  
50  
51  
52  
53  
54  
55  
56  
57  
58  
59  
60

1  
2  
3  
4 15. Greene J, Hibbard JH. Why does patient activation matter? An examination  
5  
6  
7 of the relationships between patient activation and health-related outcomes.  
8  
9  
10  
11 J Gen Intern Med. 2012; 27:520-6.  
12  
13  
14  
15  
16  
17  
18  
19  
20

21 16. Hibbard JH, Mahoney E R, Stock R, Tusler, M. Do increases in patient  
22  
23  
24 activation result in improved self-management behaviors?. Health Services  
25  
26  
27  
28 Research.2007;42:1443-63.  
29  
30  
31  
32  
33  
34  
35  
36  
37

38 17. Fowles JB, Terry P., Xi M, Hibbard J, Bloom CT, Harvey L. Measuring self-  
39  
40  
41 management of patients' and employees' health: further validation of the  
42  
43  
44  
45 Patient Activation Measure (PAM) based on its relation to employee  
46  
47  
48  
49 characteristics. Patient Educ Couns. 2009;77:116-22  
50  
51  
52  
53  
54  
55  
56  
57  
58  
59  
60



- 1  
2  
3  
4 18. Mosen DM, Schmittiel J, Hibbard J, Sobel D, Remmers C, Bellows J. Is  
5  
6  
7 patient activation associated with outcomes of care for adults with chronic  
8  
9  
10  
11 conditions? J Ambul Care Manage. 2007;**30**:21.  
12  
13  
14  
15  
16  
17  
18  
19  
20  
21 19. Becker ER, Roblin D W. Translating primary care practice climate into patient  
22  
23  
24 activation: the role of patient trust in physician. Med care. 2008;**46**:795-805.  
25  
26  
27  
28  
29  
30  
31  
32  
33  
34  
35 20. Hibbard JH, Cunningham PJ. How engaged are consumers in their health  
36  
37  
38 and health care, and why does it matter? Res Briefs. 2008;**8**:1-9.  
39  
40  
41  
42  
43  
44  
45  
46  
47  
48 21. Remmers C, Hibbard J, Mosen DM, Wagenfield M, Hoye RE, Jones C. Is  
49  
50  
51  
52 patient activation associated with future health outcomes and health-care  
53  
54  
55  
56  
57  
58  
59  
60

1  
2  
3 utilization among patients with diabetes? J Ambul Care  
4  
5

6  
7 Manage.2009;**32**:320-7.  
8  
9

- 10  
11  
12  
13  
14  
15  
16  
17 22. Donald M, Ware RS, Ozolins IZ, Begum N, Crowther R, Bain C. The role of  
18  
19  
20  
21 patient activation in frequent attendance at primary care: a population-  
22  
23  
24 based study of people with chronic disease. Patient Educ Couns.  
25  
26  
27  
28 2011;**83**:217-21.  
29  
30

- 31  
32  
33  
34  
35  
36  
37  
38 23. Greene J, Hibbard JH, Sacks R, Overton V, Parrotta CD. When patient  
39  
40  
41  
42 activation levels change, health outcomes and costs change, too. Health  
43  
44  
45  
46 affairs. 2015;**34**:431-7.  
47  
48  
49  
50  
51  
52  
53  
54  
55  
56  
57  
58  
59  
60

1  
2  
3  
4 24. Holmström I, Röing M. The relation between patient-centeredness and  
5  
6  
7 patient empowerment: a discussion on concepts. Patient Educ Couns.  
8  
9  
10  
11 2010; **79**:167-72.  
12  
13

14  
15  
16  
17  
18  
19  
20 25. Pomey MP, Flora, L, Karazivan P, Dumez V, Lebel P, Vanier MC., et al. Le  
21  
22  
23 "Montreal model" : enjeux du partenariat relationnel entre patients et  
24  
25  
26  
27 professionnels de la sante. Sante Publique.2015; **HS**:41-50.  
28  
29

30  
31  
32  
33  
34  
35  
36  
37 26. Kickbusch I, Pelikan J, Apfel F, Tsouros A. Health literacy. World Health  
38  
39  
40  
41 Organisation 2013.  
42  
43  
44  
45 [http://www.euro.who.int/\\_\\_data/assets/pdf\\_file/0008/190655/e96854.pdf](http://www.euro.who.int/__data/assets/pdf_file/0008/190655/e96854.pdf).  
46  
47  
48  
49  
50  
51  
52  
53  
54  
55  
56  
57  
58  
59  
60

- 1  
2  
3  
4 27. Hart JT. The Autonomous Patient: Ending Paternalism in Medical  
5  
6  
7 Care.JRSM.2002; **95**:623-4.  
8  
9  
10  
11  
12  
13  
14  
15  
16  
17 28. Koh H.K, Brach C, Harris LM, Parchman ML. A proposed 'health literate care  
18  
19  
20 model' would constitute a systems approach to improving patients'  
21  
22  
23 engagement in care. Health Affairs.2013;**32**:357-67.  
24  
25  
26  
27  
28  
29  
30  
31  
32  
33  
34 29. Frosch DL, Elwyn G. Don't blame patients, engage them: transforming  
35  
36  
37 health systems to address health literacy. Journal of health  
38  
39  
40 communication.2014;**19**:10-4.  
41  
42  
43  
44  
45  
46  
47  
48  
49 30. Monkman H, Andre W. eHealth literacy issues, constructs, models, and  
50  
51  
52  
53  
54 methods for health information technology design and evaluation.  
55  
56  
57  
58  
59  
60

1  
2  
3 Knowledge Management & ELearning: An International Journal  
4  
5  
6

7 (KM&EL).2015;7: 541-9.  
8  
9

10  
11  
12  
13  
14  
15  
16  
17 31. Chaudhry B, Wang J, Wu S, Maglione M, Mojica W, Roth E, Shekelle PG.  
18

19  
20  
21 Systematic review: impact of health information technology on quality,  
22

23  
24 efficiency, and costs of medical care. Annals of Internal  
25

26  
27  
28 Medicine.2006;**144**:742-52.  
29  
30

31  
32  
33  
34  
35  
36 32. Cummings E, Turner P. Patient self-management and chronic illness:  
37

38  
39 evaluating outcomes and impacts of information technology. Studies in  
40

41  
42  
43 health technology and informatics.2008;**143**:229-34.  
44  
45  
46  
47  
48  
49  
50  
51  
52  
53  
54  
55  
56  
57  
58  
59  
60

1  
2  
3 33. Dorr D, Bonner LM, Cohen, AN, Shoai, RS, Perrin R, Chaney E, Young AS.  
4  
5  
6

7 Informatics systems to promote improved care for chronic illness: a  
8  
9

10 literature review. JAMIA. 2007;**14**:156-63.  
11  
12  
13  
14  
15  
16  
17  
18  
19  
20

21 34. Häyrinen K, Saranto K, Nykänen P. Definition, structure, content, use and  
22  
23

24 impacts of electronic health records: a review of the research literature. Int J  
25  
26  
27

28 Med Inform. 2008;**77**:291-304.  
29  
30  
31  
32  
33  
34  
35  
36  
37

38 35. Lau F, Kuziemy C, Price M, Gardner JA. Review on systematic reviews of  
39  
40  
41

42 health information system studies. JAMIA. 2010;**17**:637-45.  
43  
44  
45  
46  
47  
48  
49  
50  
51

52 36. Rigby M, Georgiou A, Hyppönen H, Ammenwerth E, de Keizer N, Magrabi F,  
53  
54

55 Scott P. Patient Portals as a Means of Information and Communication  
56  
57  
58  
59  
60

1  
2  
3 Technology Support to Patient-Centric Care Coordination – the Missing  
4  
5  
6

7 Evidence and the Challenges of Evaluation. Yearbook of Medical  
8  
9

10 Informatics 2015;**10**:148-59.  
11  
12  
13  
14  
15  
16  
17

18 37. Eland-de Kok, P van Os-Medendorp H, Vergouwe-Meijer A,  
19  
20

21  
22 Bruijnzeel-Koomen C, Ros W. A systematic review of the effects of e-health  
23  
24  
25

26 on chronically ill patients. J ClinNurs, 2011;**20**:2997-3010.  
27  
28  
29  
30  
31  
32  
33  
34  
35

36 38. Irizarry T, Dabbs AD, Curran CR. Patient portals and patient engagement: a  
37  
38

39 state of the science review. JMIR. 2015;**17**.  
40  
41  
42  
43  
44  
45  
46  
47  
48  
49  
50  
51  
52  
53  
54  
55  
56  
57  
58  
59  
60

- 1  
2  
3  
4 39. Price M, Bellwood P, Kitson N, Davies I, Weber J, Lau F. Conditions  
5  
6  
7 potentially sensitive to a personal health record (PHR) intervention, a  
8  
9  
10  
11 systematic review. BMC Med Inform Decis Mak. 2015;**15**:32.  
12  
13  
14  
15  
16  
17  
18  
19  
20  
21 40. Ross J, Stevenson F, Lau R, Murray E. Factors that influence the  
22  
23  
24 implementation of e-health: a systematic review of systematic reviews (an  
25  
26  
27  
28 update). Implementation Science. 2016;**11**:146.  
29  
30  
31  
32  
33  
34  
35  
36  
37  
38 41. Strisland F, Svagård ., Austad H, Reitan J. Meeting end user needs in  
39  
40  
41  
42 international research projects aiming to develop medical device technology  
43  
44  
45  
46 prototypes for integrated care: A case study. Int J Integr Care 2016;**16**.  
47  
48  
49  
50  
51  
52  
53  
54  
55  
56  
57  
58  
59  
60



- 1  
2  
3  
4 42. Monkman H, KUSHNIRUIC A. Applying usability methods to identify health  
5  
6  
7 literacy issues: an example using a Personal Health Record. Stud Health  
8  
9  
10  
11 Technol Inform. 2013; 183:179-85.  
12  
13  
14  
15  
16  
17  
18  
19  
20  
21 43. Research2Guidance. mHealth App Developer Economics: The current status  
22  
23  
24 and trends of the mHealth app market, 2017. [https://www.uzelf.org/wp-](https://www.uzelf.org/wp-content/uploads/2017/12/R2G-mHealth-Developer-Economics-2017-Status-And-Trends.pdf)  
25  
26  
27  
28 [content/uploads/2017/12/R2G-mHealth-Developer-Economics-2017-Status-](https://www.uzelf.org/wp-content/uploads/2017/12/R2G-mHealth-Developer-Economics-2017-Status-And-Trends.pdf)  
29  
30  
31 [And-Trends.pdf](https://www.uzelf.org/wp-content/uploads/2017/12/R2G-mHealth-Developer-Economics-2017-Status-And-Trends.pdf).  
32  
33  
34  
35  
36  
37  
38  
39  
40  
41  
42 44. Greenhalgh T, Hinder S, Stramer K, Bratan T, Russell J. Adoption, non-  
43  
44  
45 adoption, and abandonment of a personal electronic health record: case  
46  
47  
48  
49 study of HealthSpace. BMJ. 2010;**341**:c5814.  
50  
51  
52  
53  
54  
55  
56  
57  
58  
59  
60

- 1  
2  
3  
4 45. Garabedian, LF, Ross-Degnan, D, Wharam JF. Mobile phone and  
5  
6  
7 smartphone technologies for diabetes care and self-management. Current  
8  
9  
10  
11 diabetes reports. 2015;**15**:109.  
12  
13  
14  
15  
16  
17  
18  
19 46. Group N. Catalyst Insights Council Monthly Report: How to Hardwire Patient  
20  
21  
22 Engagement into Care Delivery Processes, 2017.  
23  
24  
25  
26 [https://join.catalyst.nejm.org/hubfs/Insights%20Council%20Monthly%20-](https://join.catalyst.nejm.org/hubfs/Insights%20Council%20Monthly%20-%20Files/Insights%20Council%20Monthly%20May%202017%20Report_How%20to%20Hardwire%20Patient%20Engagement%20into%20Care%20Delivery%20Processes.pdf)  
27  
28  
29  
30  
31  
32  
33  
34  
35  
36  
37  
38  
39  
40  
41  
42  
43  
44  
45 47. Khoja S, Durrani H, Scott RE, Sajwani A, Piryani U. Conceptual framework  
46  
47  
48  
49 for development of comprehensive e-health evaluation tool. Telemedicine  
50  
51  
52  
53 and e-Health. 2013;**19**:48-53.  
54  
55  
56  
57  
58  
59  
60

1  
2  
3  
4  
5  
6  
7  
8  
9 48. Lawani MA, Valéra B, Fortier-Brochu É, Légaré F, Carmichael PH, Côté L,  
10  
11  
12 Giguere AM. Five shared decision-making tools in 5 months: use of rapid  
13  
14  
15  
16 reviews to develop decision boxes for seniors living with dementia and their  
17  
18  
19 caregivers. *Systematic reviews*. 2017;**6**:56.  
20  
21  
22  
23  
24  
25  
26  
27  
28

29  
30 49. Zanaboni P, Ngangue P, Mbemba GIC, Schopf TR, Bergmo TS, Gagnon M  
31  
32  
33 P. Methods to Evaluate the Effects of Internet-Based Digital Health  
34  
35  
36  
37 Interventions for Citizens: Systematic Review of Reviews. *JMIR*.  
38  
39  
40  
41 2018;**20**e10202.  
42  
43  
44  
45  
46  
47  
48  
49  
50

51 50. Giguere AM, Labrecque M, Haynes RB, Grad R, Pluye P, Légaré F, et al.  
52  
53  
54 Evidence summaries (decision boxes) to prepare clinicians for shared  
55  
56  
57  
58  
59  
60

1  
2  
3 decision-making with patients: a mixed methods implementation study.  
4  
5

6  
7 Implement Sci.2014;**9**:144.  
8  
9

10  
11  
12  
13  
14  
15  
16  
17 51. Lemieux V. Pour qu'on se comprenne: guide de littérature en santé, 2014.  
18

19  
20  
21 [https://publications.santemontreal.qc.ca/uploads/tx\\_ assmpublications/litter](https://publications.santemontreal.qc.ca/uploads/tx_ assmpublications/litter)  
22  
23  
24 [atie\\_v9.pdf](#).  
25  
26

27  
28  
29  
30  
31  
32 52. Hibbard JH, Mahoney ER, Stockard J, Tusler M. Development and testing of  
33  
34  
35  
36 a short form of the patient activation measure. Health Services  
37

38  
39  
40 Research.2005;**40**:1918-30.  
41  
42  
43  
44  
45  
46  
47  
48  
49

50 53. Health I. Patient Activation Measure, 2014. <http://www.insigniahealth.com/>  
51  
52  
53  
54  
55  
56  
57  
58  
59  
60

1  
2  
3 54. Glasgow RE, Wagner EH, Schaefer J, Mahoney LD, Reid RJ, Greene SM.  
4  
5

6  
7 Development and validation of the patient assessment of chronic illness  
8

9  
10  
11 care (PACIC). Medical care. 2005;436-44.  
12  
13

14  
15  
16  
17  
18  
19  
20  
21 55. Davis FD. Perceived usefulness, perceived ease of use, and user  
22

23  
24 acceptance of information technology. MIS quarterly.1989:319-40.  
25  
26

27  
28  
29  
30  
31  
32  
33  
34 56. Solomon M, Wagner SL, Goes J. Effects of a Web-based intervention for  
35

36  
37 adults with chronic conditions on patient activation: online randomized  
38

39  
40  
41 controlled trial. JMIR. 2012;14:e32.  
42  
43  
44  
45  
46  
47  
48  
49  
50  
51  
52  
53  
54  
55  
56  
57  
58  
59  
60

1  
2  
3  
4 57. Ghandour E, Gagnon M-P, Fortin J-P. Patient adoption of a connected  
5  
6  
7 electronic personal health record to support chronic disease management in  
8  
9  
10  
11 primary care in Quebec. Submitted for publication.  
12  
13  
14  
15  
16  
17  
18  
19  
20

21 58. Ghandour E, Gagnon M-P, Fortin J-P. Conditions d'adoption du dossier de  
22  
23  
24 santé électronique personnel par les professionnels de la première ligne au  
25  
26  
27  
28 Québec : Perspectives professionnelle et organisationnelle. Revue Santé  
29  
30  
31 Publique. 2017; **29**:837-850.  
32  
33  
34  
35  
36  
37  
38  
39  
40  
41

42 59. World Health Organization. Beginning with the end in mind planning pilot  
43  
44  
45 projects and other programmatic research for successful scaling up,  
46  
47  
48  
49 2014.[https://www.who.int/reproductivehealth/publications/strategic\\_approac](https://www.who.int/reproductivehealth/publications/strategic_approach/9789241502320/en/)  
50  
51  
52  
53 [h/9789241502320/en/](https://www.who.int/reproductivehealth/publications/strategic_approach/9789241502320/en/)  
54  
55  
56  
57  
58  
59  
60

1  
2  
3  
4  
5  
6  
7 60. Hendriks M, Rademakers J. Relationships between patient activation,  
8  
9  
10  
11 disease-specific knowledge and health outcomes among people with  
12  
13  
14  
15 diabetes; a survey study. BMC health serv res. 2014;**14**:393.  
16  
17  
18  
19  
20  
21  
22  
23

24 61. Aronson J. A pragmatic view of thematic analysis. Qualitative  
25  
26  
27  
28 Report.1994;**2**:1-3  
29  
30  
31  
32  
33  
34  
35  
36  
37

38 62. Miles MB, Huberman AM. Qualitative data analysis: An Expanded  
39  
40  
41  
42 Sourcebook. Sage. 2003.  
43  
44  
45  
46  
47  
48  
49  
50  
51  
52  
53  
54  
55  
56  
57  
58  
59  
60

1  
2  
3  
4 63. Parry D, Salsberg J, Macaulay AC, et al. A Guide to Researcher and  
5  
6  
7 Knowledge-User Collaboration in Health Research. C.I.o.H.R. (CIHR)  
8  
9  
10  
11 Editor. 2009:83.  
12  
13  
14  
15  
16  
17  
18  
19  
20

21 64. Baumbusch JL, Kirkham SR, Khan KB, McDonald H, Semeniuk P, Tan E,  
22  
23  
24 Anderson JM. Pursuing common agendas: a collaborative model for  
25  
26  
27  
28 knowledge translation between research and practice in clinical settings.  
29  
30  
31  
32 Res Nurs Health. 2008; **31**:130-40.  
33  
34  
35  
36  
37  
38  
39  
40  
41  
42

## Footnotes

43 **Protocol version:** Version 1 (November 15<sup>th</sup> 2018)  
44  
45  
46  
47  
48  
49  
50

51 **Funding:** This study is funded by the Canadian Institutes of Health Research.  
52  
53  
54  
55  
56  
57  
58  
59  
60

Funding Reference Number: PCG-155469.



1  
2  
3 **Authors' contributions:** MPG, AL, GC, and CC conceived and designed the study  
4  
5  
6  
7 and drafted the manuscript. AG, JPF, FL, HW, ALB, RB, CS, AM, SRA, CD, EK,  
8  
9  
10  
11 FLP, JR, MAN participated in designing the study and revised the manuscript. All  
12  
13  
14  
15 authors read and approved the final manuscript.  
16  
17  
18

19 **Competing interest:** The authors declare that they have no competing interests.  
20  
21  
22  
23  
24  
25  
26  
27  
28  
29  
30  
31  
32  
33  
34  
35  
36  
37  
38  
39  
40  
41  
42  
43  
44  
45  
46  
47  
48  
49  
50  
51  
52  
53  
54  
55  
56  
57  
58  
59  
60

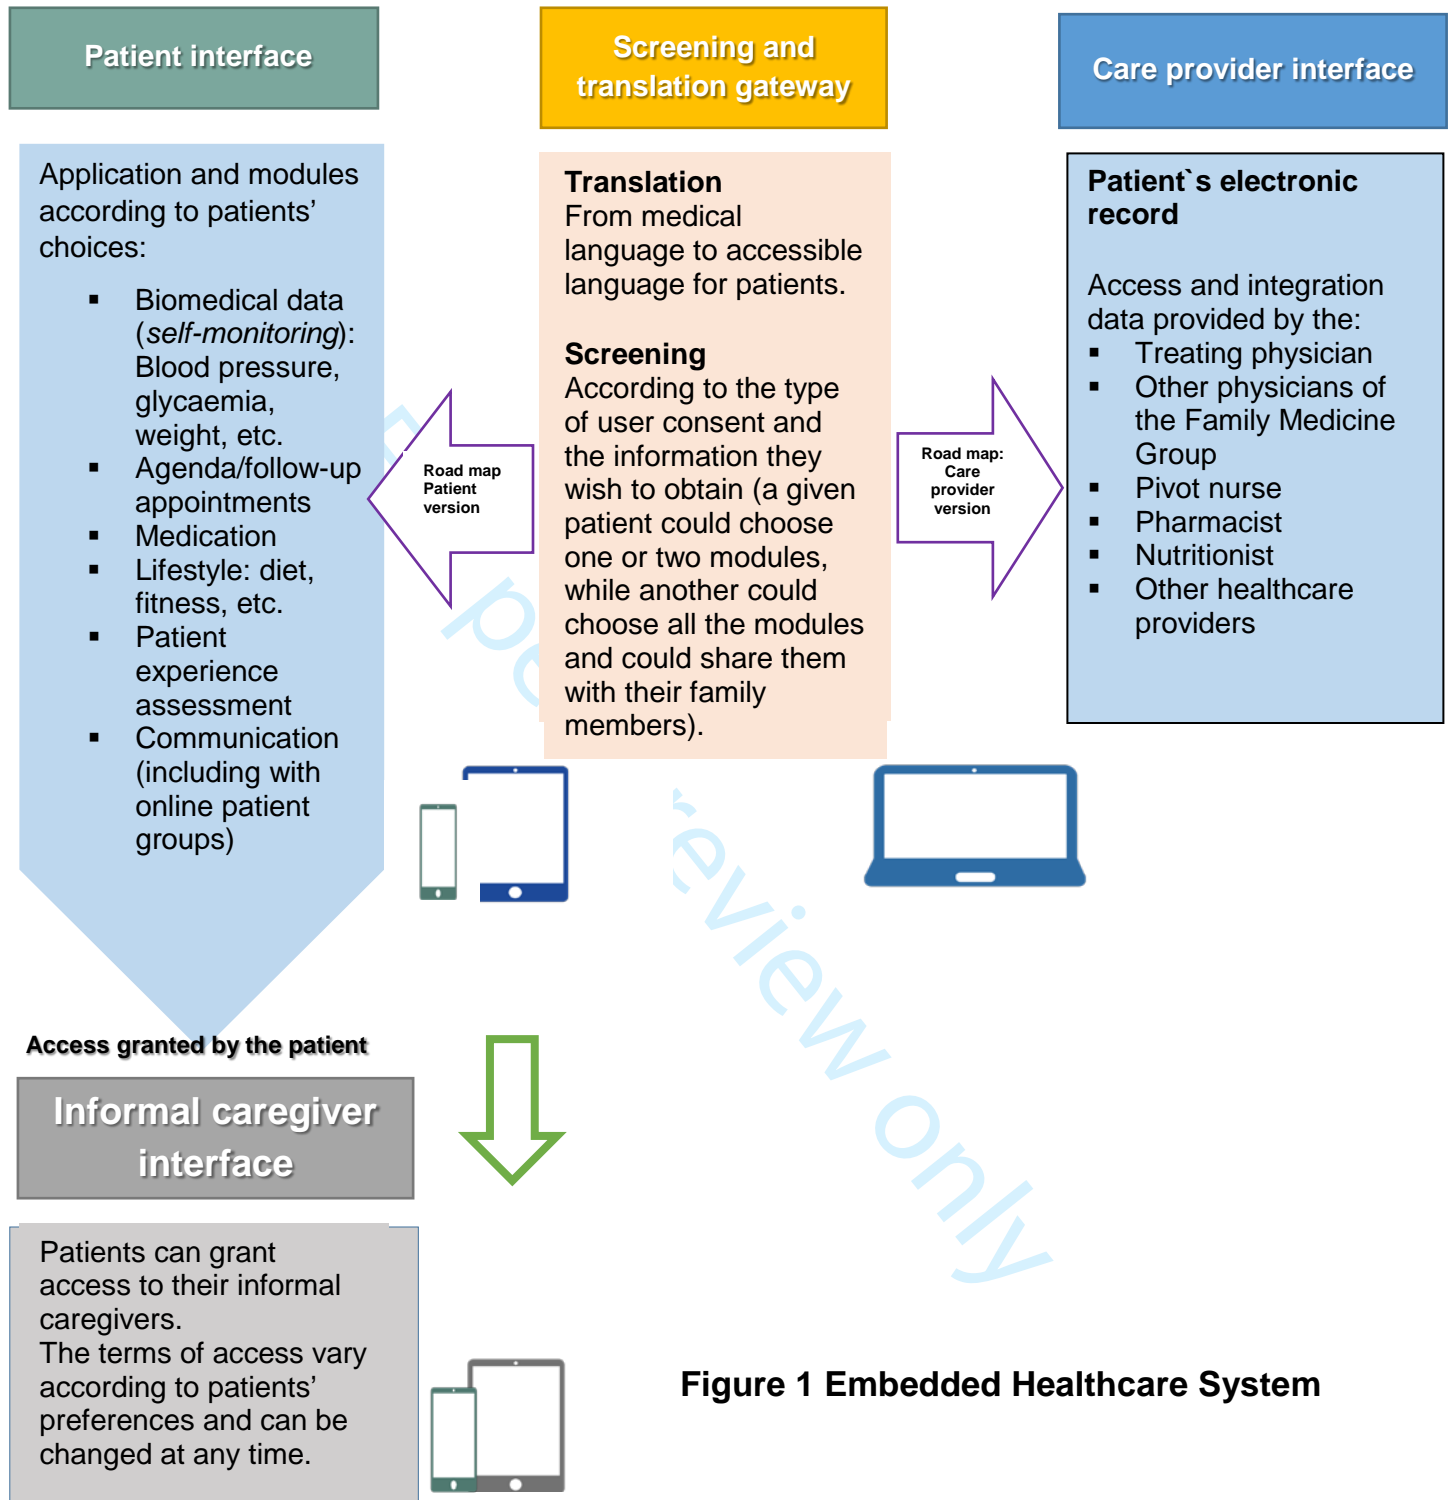

**Figure 1 Embedded Healthcare System**

Phase 1

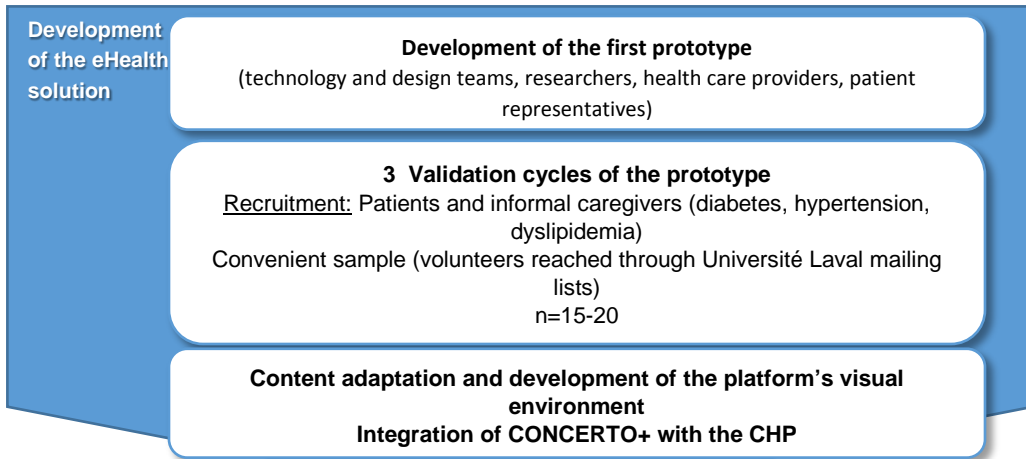

Phase 2

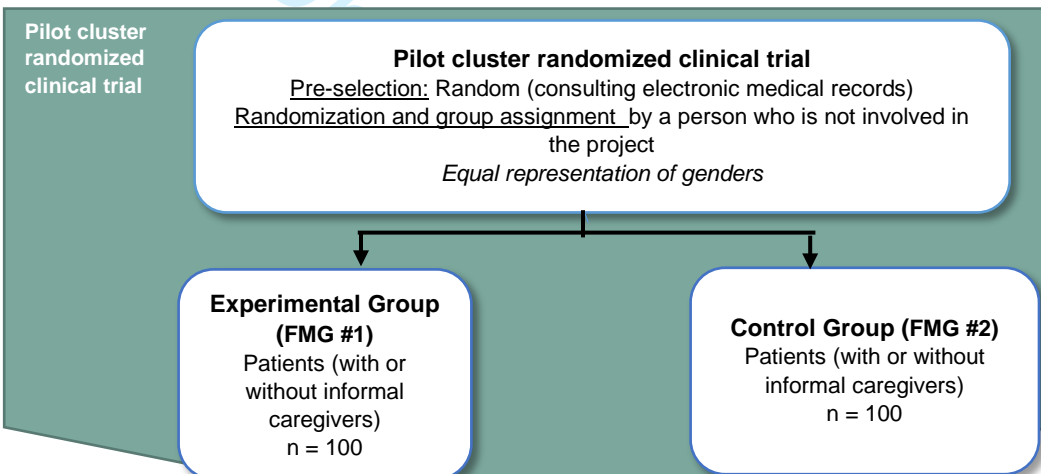

Phase 3

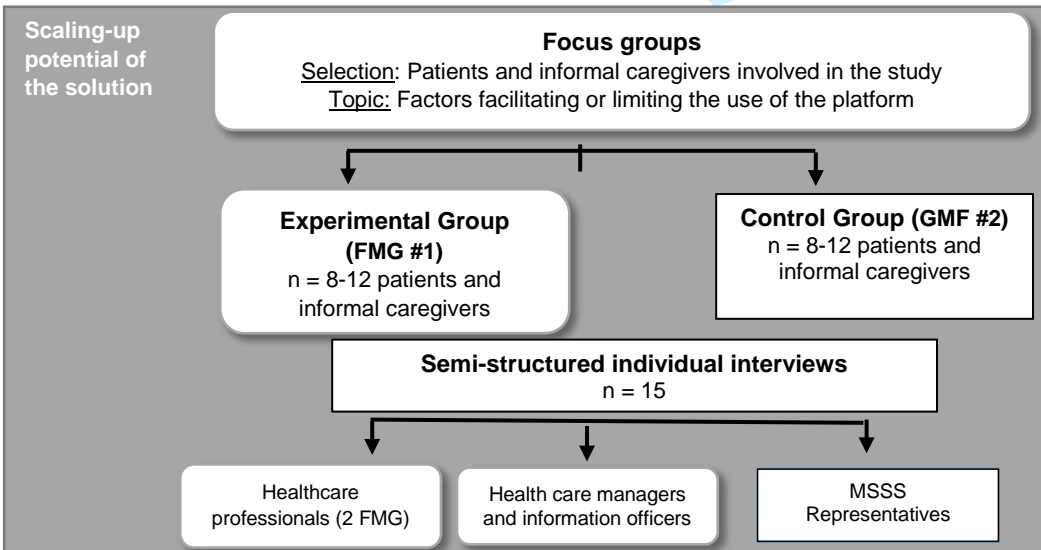

Figure 2 Recruitment flowchart

1  
2  
3  
4  
5  
6  
7  
8  
9  
10  
11  
12  
13  
14  
15  
16  
17  
18  
19  
20  
21  
22  
23  
24  
25  
26  
27  
28  
29  
30  
31  
32  
33  
34  
35  
36  
37  
38  
39  
40  
41  
42  
43  
44  
45  
46  
47  
48  
49  
50  
51  
52  
53  
54  
55  
56  
57  
58  
59  
60

**Supplementary File 1: Mesure d'activation du patient (PAM-13) French translation**

| <b>1. Activation du patient</b>                                                                                                                                                                                                                                                                                                                                                                                                                                                                                                                                                                                                                                                                                                                                                                                                                                                                                                                                                                                                                                                                                                                                                                                                                                                                                                                                                                                                                                                                                                                                                                                                                                                              |  |
|----------------------------------------------------------------------------------------------------------------------------------------------------------------------------------------------------------------------------------------------------------------------------------------------------------------------------------------------------------------------------------------------------------------------------------------------------------------------------------------------------------------------------------------------------------------------------------------------------------------------------------------------------------------------------------------------------------------------------------------------------------------------------------------------------------------------------------------------------------------------------------------------------------------------------------------------------------------------------------------------------------------------------------------------------------------------------------------------------------------------------------------------------------------------------------------------------------------------------------------------------------------------------------------------------------------------------------------------------------------------------------------------------------------------------------------------------------------------------------------------------------------------------------------------------------------------------------------------------------------------------------------------------------------------------------------------|--|
| <b>Outil utilisé</b>                                                                                                                                                                                                                                                                                                                                                                                                                                                                                                                                                                                                                                                                                                                                                                                                                                                                                                                                                                                                                                                                                                                                                                                                                                                                                                                                                                                                                                                                                                                                                                                                                                                                         |  |
| Mesure d'activation du patient ( <i>Patient Activation Measure-PAM-13</i> )                                                                                                                                                                                                                                                                                                                                                                                                                                                                                                                                                                                                                                                                                                                                                                                                                                                                                                                                                                                                                                                                                                                                                                                                                                                                                                                                                                                                                                                                                                                                                                                                                  |  |
| <b>Critères <sup>1</sup></b>                                                                                                                                                                                                                                                                                                                                                                                                                                                                                                                                                                                                                                                                                                                                                                                                                                                                                                                                                                                                                                                                                                                                                                                                                                                                                                                                                                                                                                                                                                                                                                                                                                                                 |  |
| <ol style="list-style-type: none"> <li>1. En fin de compte, je suis la personne qui est responsable de gérer ma condition de santé</li> <li>2. Prendre un rôle actif dans mes soins de santé et le facteur le plus important pour déterminer ma santé et mon habileté pour fonctionner</li> <li>3. Je suis confiant que je peux prendre des actions qui m'aideront à prévenir ou minimiser certains symptômes ou problèmes associés avec ma condition de santé</li> <li>4. Je sais quels sont les effets de tous mes médicaments prescrits</li> <li>5. Je suis persuadé que je peux savoir quand j'ai besoin de soins médicaux et quand je peux gérer mes problèmes de santé par moi-même</li> <li>6. Je suis persuadé que je peux exprimer à mon professionnel de la santé mes préoccupations même quand il ou elle ne le demande pas</li> <li>7. Je suis convaincu que je peux appliquer les traitements médicaux dont j'ai besoin à la maison</li> <li>8. Je comprends la nature et les causes de ma condition de santé</li> <li>9. Je connais les différentes options de traitements médicaux qui sont disponibles pour ma condition de santé</li> <li>10. J'ai été capable de maintenir des changements de style de vie que j'ai adopté pour ma santé</li> <li>11. Je sais comment prévenir des problèmes ultérieurs en lien avec ma condition de santé</li> <li>12. Je suis confiant que je peux trouver des solutions quand des nouvelles situations ou problèmes apparaissent en lien avec ma condition de santé</li> <li>13. Je suis persuadé que je peux maintenant des changements de style de vie comme une diète et de l'exercice même durant des périodes de stress</li> </ol> |  |
| <b>Mesure des résultats</b>                                                                                                                                                                                                                                                                                                                                                                                                                                                                                                                                                                                                                                                                                                                                                                                                                                                                                                                                                                                                                                                                                                                                                                                                                                                                                                                                                                                                                                                                                                                                                                                                                                                                  |  |
| <p><b>Notation</b> (pour chaque critère) :</p> <ul style="list-style-type: none"> <li>▪ Fortement en désaccord (1 point)</li> <li>▪ En désaccord (2 points)</li> <li>▪ En accord (3 points)</li> <li>▪ Fortement en accord (4 points)</li> </ul> <p><b>Niveaux d'activation</b> (selon la conversion des résultats sur un score de 100) :</p> <ol style="list-style-type: none"> <li>1. Ne croit pas que l'activation est important (<math>\leq 47</math>)</li> <li>2. Manque de savoir ou de confiance pour agir (47.1-55.1)</li> <li>3. Commence à agir (55.2-67)</li> <li>4. Agit (<math>\geq 67.1</math>)</li> </ol>                                                                                                                                                                                                                                                                                                                                                                                                                                                                                                                                                                                                                                                                                                                                                                                                                                                                                                                                                                                                                                                                     |  |

<sup>1</sup> Adapté de: Moljord I E O, Lara-Cabrera ML, Perestelo-Pérez L, Rivero-Santana A, Eriksen L, Linaker OM. Psychometric properties of Patient Activation Measure-13 among out-patients waiting for mental health treatment: a validation study in Norway. *Patient education and counseling*. 2015;98(11):1410-1417.

Traduction libre

## 2. Impacts de l'utilisation de CONCERTO+

### Outil utilisé

Questionnaire utilisé lors de l'évaluation de la phase pilote du Programme de santé Concerto<sup>1</sup>

### Critères<sup>2</sup>

#### Résolution de problèmes/conseils :

1. Vous a-t-on demandé quels étaient les effets de votre maladie sur votre vie ?
2. Vous a-t-on aidé à planifier afin de pouvoir prendre soin de votre état de santé même en des moments difficiles ?
3. Vos fournisseurs de soins tenaient-ils compte de vos valeurs et de vos traditions au moment de vous recommander un traitement ?
4. Vous a-t-on aidé à élaborer un plan de traitement que vous pourriez mettre en pratique dans votre vie quotidienne ?

#### Prestation de soins/aide à la décision :

1. Vous a-t-on posé des questions sur vos habitudes de santé ?
2. Vous a-t-on encouragé à faire partie d'un groupe ou d'une classe, comme une session d'information éducative, pour vous aider à vivre avec votre état de santé chronique ?
3. Vous a-t-on remis une copie de votre plan de traitement ?

#### Établissement des objectifs/personnalisation :

1. Vous a-t-on demandé de parler de vos objectifs en ce qui concerne la manière de prendre soin de votre condition chronique ?
2. Vous a-t-on aidé à fixer des objectifs spécifiques pour améliorer votre alimentation ou votre activité physique ?
3. Vous a-t-on montré comment ce que vous avez fait pour prendre soins de vous-même a influencé votre condition chronique ?
4. Vous a-t-on remis une liste écrite des choses que vous devriez faire pour améliorer votre santé ?
5. Étiez-vous satisfait de la manière dont vos soins étaient organisés ?

#### Coordination des soins :

1. Vous a-t-on dirigé vers un diététiste, un éducateur en matière de santé ou un conseiller ?
2. Vous a-t-on dit comment vos visites chez d'autres genres de médecins (p. ex., spécialiste, chirurgien) contribuaient à votre traitement ?
3. Vous a-t-on demandé comment se passaient vos visites chez les autres médecins ?
4. A-t-on communiqué avec vous après une visite pour savoir comment les choses se passaient ?

#### Globalité des soins :

Depuis que vous utilisez CONCERTO+, avez-vous...

1. Pu obtenir un rendez-vous avec un professionnel de la clinique ?
2. Été aidé(e) lorsque vous en aviez besoin ?
3. Obtenue un rendez-vous de suivi de votre condition de santé ?
4. Eu besoin d'entrer en contact avec un professionnel de l'équipe ou reçu une réponse de l'un d'entre eux à la suite de votre appel téléphonique ?
5. L'impression que votre infirmière coordonne l'ensemble de vos soins ?

<sup>1</sup> Adapté de : McIntosh, CN. Examen de la validité factorielle de certains modules de l'Enquête canadienne sur l'expérience des soins de santé primaires. Statistique Canada, Division de l'information et de la recherche sur la santé. Juillet 2008.

<sup>2</sup> Ces critères ont été développés initialement et validés par Glasgow et collaborateurs : Glasgow RE, Wagner EW, Schaefer J, MahoneyLD, Reid RJ, Greene SM. 2005. Development and validation of the patient assessment of chronic illness care (PACIC). Medical Care. 43, 5: 436-444.

6. Le sentiment que l'équipe du Programme a tenu compte de votre problème de santé ?
7. Pu constater que l'on a tenu compte de vos consultations avec d'autres professionnels de la santé que ceux de l'équipe du Programme ?
8. Pu vous faire aider à comprendre vos résultats de tests (par exemple : test de laboratoire, prise de pression, etc.) ?
9. Obtenue une réponse lors d'une situation urgente pour vous ?

### 3. Acceptation de CONCERTO+

#### Outils utilisé

Questionnaire basé sur le Modèle d'acceptation de la technologie

#### Critères

##### Facilité d'utilisation perçue :

1. Mon interaction avec le système CONCERTO+ est claire et compréhensible
2. Je trouve qu'il est facile de demander au système CONCERTO+ de faire ce que je veux
3. L'utilisation de CONCERTO+ améliorera mon suivi
4. L'utilisation de CONCERTO+ améliorera mon efficacité à me prendre en charge

##### Utilité perçue :

1. L'utilisation de CONCERTO+ améliorera mon état de santé
2. Je trouve que CONCERTO+ est un outil utile pour le suivi de mon état de santé
3. L'utilisation de CONCERTO+ plus intéressant.
4. J'aime travailler avec l'ordinateur.
5. Je cherche des aspects de mon métier qui demande d'utiliser l'ordinateur

##### Intention comportementale d'utiliser :

1. Je vais utiliser CONCERTO+ dans le futur.
2. J'établis un plan pour utiliser CONCERTO+

### 4. Utilisation de CONCERTO+

#### Outil utilisé

Registres d'utilisation de CONCERTO+

#### Critères

Registres (*Logs*)

1  
2  
3  
4  
5  
6  
7  
8  
9  
10  
11  
12  
13  
14  
15  
16  
17  
18  
19  
20  
21  
22  
23  
24  
25  
26  
27  
28  
29  
30  
31  
32  
33  
34  
35  
36  
37  
38  
39  
40  
41  
42  
43  
44  
45  
46  
47  
48  
49  
50  
51  
52

**Supplementary File 2: Outcome measures and items (original English version)**

| <b>1. Patient Activation</b>                                                                                                                                                                                                                                                                                                                                                                                                                                                                                                                                                                                                                                                                                                                                                                                                                                                                                                                                                                                                                                                                                                                                                                                                                                                                             |  |
|----------------------------------------------------------------------------------------------------------------------------------------------------------------------------------------------------------------------------------------------------------------------------------------------------------------------------------------------------------------------------------------------------------------------------------------------------------------------------------------------------------------------------------------------------------------------------------------------------------------------------------------------------------------------------------------------------------------------------------------------------------------------------------------------------------------------------------------------------------------------------------------------------------------------------------------------------------------------------------------------------------------------------------------------------------------------------------------------------------------------------------------------------------------------------------------------------------------------------------------------------------------------------------------------------------|--|
| <b>Tool used</b>                                                                                                                                                                                                                                                                                                                                                                                                                                                                                                                                                                                                                                                                                                                                                                                                                                                                                                                                                                                                                                                                                                                                                                                                                                                                                         |  |
| <i>Patient Activation Measure-PAM-13</i>                                                                                                                                                                                                                                                                                                                                                                                                                                                                                                                                                                                                                                                                                                                                                                                                                                                                                                                                                                                                                                                                                                                                                                                                                                                                 |  |
| <b>Criteria<sup>1</sup></b>                                                                                                                                                                                                                                                                                                                                                                                                                                                                                                                                                                                                                                                                                                                                                                                                                                                                                                                                                                                                                                                                                                                                                                                                                                                                              |  |
| 1. When all is said and done, I am the person who is responsible for managing my health condition.<br>2. Taking an active role in my own healthcare is the most important factor in determining my health and ability to function.<br>3. I am confident that I can take actions that will help prevent or minimize some symptoms or problems associated with my health condition.<br>4. I know what each of my prescribed medications does.<br>5. I am confident I can tell when I need to go get medical care and when I can handle a health problem.<br>6. I am confident I can tell my health provider the concerns I have even when he or she does not ask.<br>7. I am confident I can follow through on the medical treatment I need to do at home.<br>8. I understand the nature and causes of my health condition.<br>9. I know the different medical treatment options available for my health condition.<br>10. I have been able to maintain the lifestyle changes I have made for my health.<br>11. I know how to prevent further problems with my health condition.<br>12. I am confident I can find a solution when new situations or problems arise with my health condition.<br>13. I am confident I can maintain lifestyles changes, like diet and exercise, even during times of stress. |  |
| <b>Results measurement</b>                                                                                                                                                                                                                                                                                                                                                                                                                                                                                                                                                                                                                                                                                                                                                                                                                                                                                                                                                                                                                                                                                                                                                                                                                                                                               |  |
| <b>Scoring</b> (for each criteria): <ul style="list-style-type: none"> <li>▪ Strongly disagree = 1</li> <li>▪ Disagree = 2</li> <li>▪ Agree = 3</li> <li>▪ Strongly agree = 4</li> </ul>                                                                                                                                                                                                                                                                                                                                                                                                                                                                                                                                                                                                                                                                                                                                                                                                                                                                                                                                                                                                                                                                                                                 |  |
| <b>Activation level</b> (converted into a score of 100): <ol style="list-style-type: none"> <li>1. Not believing that activation is important (<math>\leq 47</math>)</li> <li>2. Lack of knowledge or confidence to take action (47.1-55.1)</li> <li>3. Beginning to take action (55.2-67)</li> <li>4. Taking action (<math>\geq 67.1</math>)</li> </ol>                                                                                                                                                                                                                                                                                                                                                                                                                                                                                                                                                                                                                                                                                                                                                                                                                                                                                                                                                 |  |

53  
54  
55  
56  
57  
58  
59  
60

<sup>1</sup> Adapted from: Moljord I E O, Lara-Cabrera ML, Perestelo-Pérez L, Rivero-Santana A, Eriksen L, Linaker OM. Psychometric properties of Patient Activation Measure-13 among out-patients waiting for mental health treatment: a validation study in Norway. *Patient education and counseling*. 2015;98(11):1410-1417.

## 2. Impacts of the use of CONCERTO+

### Tool used

Survey used for the assessment of the CHP pilot

### Criteria<sup>1</sup>

#### Problem-solving/Advice

1. Have you been asked how your illness affects your life?
2. Have you been helped in planning ahead to take care of your illness even in hard times?
3. Did your care providers ask about your values and traditions when they recommended treatment?
4. Have you been helped in drawing up a treatment plan that you could follow in your daily life?

#### Delivery system design/Decision support

1. Have you been asked about your health habits?
2. Have you been encouraged to go to a specific group or class to help you cope with your chronic illness?
3. Have you been given a copy of your treatment plan?

#### Goal-setting/Tailoring

1. Have you been asked to talk about your goals in the context of receiving care for your chronic condition?
2. Have you been helped in setting specific goals to improve your diet or fitness?
3. Have you been given a written list of things you should do to improve your health?
4. Have you been shown how taking proper care of your illness influenced your condition?
5. Are you satisfied that your care was well organized?

#### Follow-up/Coordination

1. Have you been referred to a dietitian, health educator, or counselor?
2. Have you been told how your visits with other doctors were going?
3. Have you been told how your visits with other types of doctors, such as a specialist or a surgeon, helped in your treatment?
4. Have you been asked how your visits with other doctors were going?
5. Have you been contacted after a visit to see how things were going?

#### Overall care<sup>2</sup>

Since you began using CONCERTO+

1. Have you had an appointment with a professional from the clinic?
2. Have you received help when you were in need?
3. Have you had a follow-up appointment for your health condition?
4. Have you been helped through contact with a professional from the team or by receiving an answer from one of the team members after a phone call?
5. Have you had the feeling that your nurse coordinates all of your care?
6. Have you had the feeling that your health problems are being taken into account by the Program team?
7. Have you noticed that your visits with other health professionals are being taken into account by the Program team?
8. Have you been helped in understanding your test results (e.g. laboratory test, pressure tap, etc.)?
9. Have you received an answer in emergency situations?

<sup>1</sup> These criteria were originally developed and validated by Glasgow RE, Wagner EW, Schaefer J, Mahoney LD, Reid RJ, Greene SM. 2005. Development and validation of the patient assessment of chronic illness care (PACIC). *Medical Care*. 43, 5: 436–444.

<sup>2</sup> Adapted from McIntosh, CN. Examen de la validité factorielle de certains modules de l'Enquête canadienne sur l'expérience des soins de santé primaires. *Statistique Canada, Division de l'information et de la recherche sur la santé*. July 2008.



### 3. Acceptance of CONCERTO+

#### Tool used

Survey based on the *Technology Acceptance Model*

#### Criteria

##### Perceived ease of use

1. My interaction with CONCERTO+ is clearer and more comprehensive.
2. I find it is easy to get CONCERTO+ to do what I want it to do.
3. The use of CONCERTO+ will improve my follow-up.
4. The use of CONCERTO+ will improve the effectiveness of my care.

##### Perceived usefulness

1. The use of CONCERTO+ will improve my health condition.
2. I find CONCERTO+ to be a useful tool for the follow-up of my health condition.
3. The use of CONCERTO+ is interesting.
4. I like to use a smart phone or a tablet to look for health information.
5. I'm eager to use technology to manage my health condition.

##### Behavioural intention to use

1. I'm going to use CONCERTO+ in the future.
2. Using CONCERTO+ is part of my plan.

### 4. The use of CONCERTO+

#### Tool used

CONCERTO+ logs use

#### Criteria

*Logs*

**Supplementary File 3:** ExpandNet recommendations for scaling up (WHO, 2013) Original English version

1. Engage in a participatory process involving key stakeholders.
2. Ensure the relevance of the proposed innovation.
3. Reach a consensus on expectations for scale up.
4. Tailor the innovation to the socio-cultural and institutional settings.
5. Keep the innovation as simple as possible.
6. Test the innovation in the variety of socio-cultural and institutional settings where it will be scaled up.
7. Test the innovation under routine operating conditions and existing resource constraints of the health system.
8. Develop plans to assess and document the process of implementation.
9. Advocate with donors and other sources of funding for financial support beyond the pilot stage.
10. Prepare to advocate for necessary changes in policies, regulations, and other health systems components.
11. Develop plans for how to promote learning and disseminate information.
12. Plan on being cautious about initiating scale up before the required evidence is available.

**Supplementary File 4:**Recommandations d'ExpandNet pour le passage à l'échelle (OMS, 2013) (French translation)

1. Engager un processus participatif impliquant les principales parties prenantes
2. Assurer la pertinence de l'innovation proposée
3. Trouver un consensus sur les attentes à propos du passage à grande échelle
4. Ajuster l'innovation aux cadres socioculturels et institutionnels
5. Garder l'innovation aussi simple que possible
6. Tester l'innovation dans la variété de cadres socioculturels et institutionnels où elle passera à grande échelle
7. Tester l'innovation dans les conditions de fonctionnement de routine et sous les contraintes de ressource actuelles du système de santé
8. Planifier l'évaluation et la documentation du processus de mise en œuvre
9. Plaider auprès des bailleurs de fonds et autres sources de financement pour un soutien financier au-delà de la phase pilote
10. Se préparer à plaider pour des changements nécessaires dans les politiques, règlements et autres composantes des systèmes de santé
11. Planifier la façon de promouvoir l'apprentissage et la diffusion de l'information
12. Se préparer à la prudence quant au lancement du passage à grande échelle avant l'obtention des preuves requises

**Supplementary File 5: Ethical and funding approval (English translation)****ETHICS APPROVAL**

Research project involving human beings or the consultation of personal information

This research project is reviewed in accordance with the ethical procedures management of research with human beings of Université Laval **by the sectorial committee of research ethics in health science**

|                                 |                                                                                                                  |
|---------------------------------|------------------------------------------------------------------------------------------------------------------|
| <b>Project title</b>            | Personalize concerto: Patient usability experience optimized for embedded, coordinated, and efficient healthcare |
| <b>Researcher's name</b>        | Marie-Pierre Gagnon                                                                                              |
| <b>Approval number</b>          | 2018-067 / 01-06-2018                                                                                            |
| <b>Decision date</b>            | June 1, 2018                                                                                                     |
| <b>Approval expiration date</b> | July 1, 2019                                                                                                     |

After reviewing the information and documents it has been provided, the committee notes that the project respects ethical principles of research with human beings. It takes note of the written confirmation of the researcher that she is aware of the follow-up actions<sup>1</sup> associated with ethical approval of this project and that she has agreed to apply them. Therefore, the committee approves this project for one year.

June 6, 2018

\_\_\_\_\_  
Mahmoud Rouabhia, Chair of the  
Research Ethics Committee in  
Health Sciences

<sup>1</sup> Follow-up action reminder on the next page.

## Follow-up actions associated with ethics approval

For the project entitled **Personalize concerto: Patient usability experience optimized for embedded, coordinated, and efficient healthcare** (file number: 2018-067)

1. Notify the Committee in writing without undue delay (independent of its statutory meeting agenda) in the following situations:
  - Any changes to the project, as approved this day, that would include changes to the choice of participants, to recruitment, to the obtention of consent, to the collection of data, and/or to the incurred risks or disadvantages before the application of any such changes (the template of the letter requesting an amendment is available on the CÉRUL website).
  - Any changes to the instrument used for recruitment (ads, posters, or other instruments), to the confirmation of consent (consent form, information sheet, or other forms of confirmation), or to the collection of data (survey, interview grid, or other data collection mechanisms) by providing the latest version of the document under consideration, where changes will be highlighted, before its use.
  - Any unexpected and serious event (e.g. psychological distress of a participant, threat against a person, unexpected or side effects of a product, a drug or a test) that may occur in the course of the current project and would involve a participant, by completing the VRR-EI form available on the CÉRUL website.
  - Any early termination of this research for any reason, be it funded or not, including reasons due to suspension or cancellation on the part of the granting agency.
2. Until the project is finished, and not only for recruitment, submit an annual renewal request for approval by providing a report on research progress, the number of recruited participants, and the difficulties encountered along the way, by using the VRR-107 form. The renewal request must be sent to the committee at least 30 days before the end date of the approval, independent of the statutory meeting agenda.

I, the undersigned, Marie-Pierre Gagnon, declare that I **have read and understood the above follow-up actions associated with ethics approval** and agree to apply them during the entire research project for which I am the principal researcher.

Signature of the principal researcher: \_\_\_\_\_

Date: 2018-06-04

## Supplementary File 6: Ethical approval (original French version)

|                                                                                                                                                                                                                                                                                                                                                                                                                                                                                         |                                                                                                          |
|-----------------------------------------------------------------------------------------------------------------------------------------------------------------------------------------------------------------------------------------------------------------------------------------------------------------------------------------------------------------------------------------------------------------------------------------------------------------------------------------|----------------------------------------------------------------------------------------------------------|
|                                                                                                                                                                                                                                                                                                                                                                                                        |                                                                                                          |
| Vice-rectorat à la recherche et à la création<br>Comité d'éthique de la recherche                                                                                                                                                                                                                                                                                                                                                                                                       |                                                                                                          |
| <h2>APPROBATION DE L'ÉTHIQUE</h2>                                                                                                                                                                                                                                                                                                                                                                                                                                                       |                                                                                                          |
| Projet de recherche impliquant des êtres humains ou<br>la consultation de renseignements personnels                                                                                                                                                                                                                                                                                                                                                                                     |                                                                                                          |
| Ce projet de recherche a été examiné en conformité avec les<br><i>Modalités de gestion de l'éthique de la recherche sur des êtres humains</i> de l'Université Laval,<br>par le <b>Comité sectoriel d'éthique de la recherche en sciences de la santé</b>                                                                                                                                                                                                                                |                                                                                                          |
| <b>Projet intitulé :</b>                                                                                                                                                                                                                                                                                                                                                                                                                                                                | Personnaliser CONCERTO : L'expérience patient optimisée pour des soins intégrés, coordonnés et efficaces |
| <b>Nom du chercheur :</b>                                                                                                                                                                                                                                                                                                                                                                                                                                                               | Madame Marie-Pierre Gagnon                                                                               |
| <b>Numéro d'approbation :</b>                                                                                                                                                                                                                                                                                                                                                                                                                                                           | 2018-067 / 01-06-2018                                                                                    |
| <b>Date de décision :</b>                                                                                                                                                                                                                                                                                                                                                                                                                                                               | 1 <sup>er</sup> juin 2018                                                                                |
| <b>Date d'expiration de l'approbation :</b>                                                                                                                                                                                                                                                                                                                                                                                                                                             | 1 <sup>er</sup> juillet 2019                                                                             |
| <p>Après examen des informations et des documents qui lui ont été transmis, le Comité a constaté que ce projet respecte les principes d'éthique de la recherche avec des êtres humains. Il prend acte de la confirmation écrite de la chercheuse à l'effet qu'elle a pris connaissance des mesures de suivi<sup>1</sup> associées à l'émission de l'approbation éthique de son projet et qu'elle accepte de les appliquer. Par conséquent, le Comité approuve ce projet pour un an.</p> |                                                                                                          |
|                                                                                                                                                                                                                                                                                                                                                                                                      |                      |
| <hr/> <b>Mahmoud Rouabhia</b> , président<br>Comité d'éthique de la recherche en sciences de la santé                                                                                                                                                                                                                                                                                                                                                                                   | Date                                                                                                     |
| <hr/> <sup>1</sup> Rappel des mesures de suivi au verso                                                                                                                                                                                                                                                                                                                                                                                                                                 |                                                                                                          |
| Maison Michael-John-Brophy<br>2241, chemin Sainte-Foy<br>Québec (Québec) G1V 0A6<br>CANADA                                                                                                                                                                                                                                                                                                                                                                                              | 418 656-2131, poste 4506<br>Télécopieur : 418 656-2840<br>cer@vrr.ulaval.ca<br>www.cer.ulaval.ca         |



Vice-rectorat à la recherche et à la création  
Comité d'éthique de la recherche

## Mesures de suivi associées à l'approbation éthique

Pour le projet intitulé : **Personnaliser CONCERTO : L'expérience patient optimisée pour des soins intégrés, coordonnés et efficients** (numéro de dossier : 2018-067)

1. Informer le Comité par écrit et dans les meilleurs délais (indépendamment du calendrier de ses réunions statutaires) des situations suivantes si elles se présentent :
  - de **toute modification au projet**, comme il a été approuvé en ce jour, qui comporterait des changements dans le choix des participants, dans le recrutement, dans la manière d'obtenir leur consentement, de réaliser la collecte des données ou encore, dans les risques ou inconvénients encourus par la participation, et ce, préalablement à l'application de ce changement (modèle de lettre de demande d'amendement disponible sur le site Internet des CÉRUL) ;
  - de **toute modification** qui serait apportée à un **instrument utilisé pour le recrutement** (annonces, affiches, etc.), pour confirmer le **consentement** (formulaire de consentement, feuillet d'information, etc.) ou pour effectuer la **collecte** des données (questionnaire, grille d'entrevue, etc.) en fournissant la nouvelle version du document concerné, où les modifications auront été mises en évidence, préalablement à son utilisation ;
  - de **tout événement imprévu et sérieux** (ex. : détresse psychologique d'un participant, menace proférée à l'égard d'une personne, effets secondaires ou imprévus ou indésirables d'un produit, d'un médicament ou d'un test, etc.) qui surviendrait dans le déroulement d'une activité du présent projet et qui impliquerait un participant, en complétant le formulaire VRR-EI disponible sur le site Internet des CÉRUL ;
  - de **l'interruption prématurée de ce projet de recherche** pour une raison quelconque qu'il soit financé ou non, y compris en raison de la suspension ou de l'annulation de l'approbation d'un organisme subventionnaire.
2. Tant que le projet ne sera pas terminé, et non seulement le recrutement, présenter annuellement une **demande de renouvellement** de l'approbation, en fournissant un rapport sur le déroulement de la recherche, le nombre de participants recrutés et, le cas échéant, sur les difficultés rencontrées en cours de réalisation, à l'aide du formulaire VRR-107. La demande de renouvellement doit être transmise au Comité dans un délai de 30 jours avant la date de fin de l'approbation, indépendamment du calendrier des réunions statutaires.

Maison Michael-John-Brophy  
2241, chemin Sainte-Foy  
Québec (Québec) G1V 0A6  
CANADA

418 656-2131, poste 4506  
Télécopieur : 418 656-2840  
cer@vrr.ulaval.ca  
www.cerul.ulaval.ca

1 Research title: Personalize concerto: Patient usability experience optimized for embedded, coordinated, and efficient healthcare

### 2 3 4 5 **Supplementary File 7: Consent form for validation cycles**

6 This research entitled "Optimizing patient usability experience with an eHealth platform for embedded, coordinated  
7 and efficient healthcare" is conducted by Marie-Pierre Gagnon, from faculty of nursing at Université Laval.

8  
9 Before you agree to take part in this research project, please take the time to read and understand the following  
10 information. This document will explain you the aim of this research project, his process, advantages, risks and  
11 disadvantages. We invite you to ask all questions you may deem necessary to the research staff. You can find  
12 their contact details at the end of the form.  
13  
14

#### 15 **Type of study**

16 This research project aims to develop, implement and evaluate a user-centered, multifunctional and personalized  
17 eHealth platform (CONCERTO+) to promote a more active patient role in chronic disease management and  
18 decision-making, satisfaction towards healthcare services and quality of life. Specific objectives are to:

- 19 1) develop a module of a multifunctional and personalized eHealth platform integrated to the CHP (Concerto Health  
20 Program) for patients and caregivers allowing them to engage in the follow-up and management of their chronic  
21 diseases;
- 22 2) test the integration of CONCERTO+ in monitoring care pathways of three frequent co-existing chronic diseases  
23 (diabetes, hypertension, dyslipidemia) and assess the usefulness and acceptability of the solution for patients with  
24 chronic diseases and their caregivers;
- 25 3) assess the scalability of the CONCERTO+ solution.  
26  
27  
28  
29

#### 30 **The course of the participation:**

##### 31 Validation of the prototype of the application CONCERTO+

32 Your participation in this research will consist in validating the prototype of the application CONCERTO+. In  
33 practical terms, you should go to the usability laboratory of Université Laval lead by Dr Holly Witteman. The  
34 validation of the application will be done either on a smartphone or a digital tablet. The aim is to collect your input  
35 in visual presentation, content, usability of the application, the pros and cons and any consideration of the  
36 application developed. Iterative testing via three validation sessions will be organized. If you agree to participate  
37 to the validation cycles, your participation may have incur parking and travel expenses. In addition, the participation  
38 in each validation cycle requires approximately one and a half hour of your time.  
39  
40  
41  
42  
43  
44  
45  
46  
47  
48  
49  
50  
51  
52  
53  
54  
55  
56  
57



Research title: Personalize concerto: Patient usability experience optimized for embedded, coordinated, and efficient healthcare

### Potential benefits and risks or disadvantages related to your participation

There are no direct benefits for the participants. However, this research enables improve the adaptation and value of the CHP in order to provide a multifunctional and personalized eHealth platform, to promote a more active patient and informal care givers role in chronic disease management.

### Compensation

If you participate in validation cycles, we can provide you a lump sum amount of 18 \$ for the time you have allocated for this activity. This sum will be returned in each validation session.

### Voluntary participation and right to withdraw

You are free to participate to this research project. You may voluntarily withdraw at any time without any justification and with no adverse consequences or without prejudice. However If you decide so, It is important to inform the research team whose contact details are included at the end of the document. All your personal information will be destroyed.

### Confidentiality and data management

The following measures will be applied to ensure your private information stays private:

- Your name will not be mentioned in any report;
- The various documents will be codified and only the investigator and his team will have access to the list of names and codes;
- Your individual results will never be shared;
- In the interest of scientific rigor, the electronic data will be kept in a folder with a password on the web server of the Canada Research Chair on Technology and Practices in Health at Université Laval. They will be destroyed only five years after the end of the research, in December 2024;
- This research will be published in scientific reviews and no one can able to identify you;
- A short summary of the research results will be sent to you if requested by indicating the address where you would like to receive the document, just after the blank space provided for your signature.

### Acknowledgment

Your collaboration is useful to achieve this study, thank you for your participation.

### Additional information

If you have any question on the research, the involvement of your participation or if you want to withdraw from this research, please contact: Mame Awa Ndiaye, research coordinator, Amélie Lampron, research coordinator or Marie-Pierre Gagnon, principal investigator at the following coordinates:

- Mame Awa Ndiaye: [mame-awa.ndiaye.ciusssc@ssss.gouv.qc.ca](mailto:mame-awa.ndiaye.ciusssc@ssss.gouv.qc.ca)
- Amélie Lampron: [amelie.lampron2.ciusssc@ssss.gouv.qc.ca](mailto:amelie.lampron2.ciusssc@ssss.gouv.qc.ca)
- Marie-Pierre Gagnon: [marie-pierre.gagnon@fsi.ulaval.ca](mailto:marie-pierre.gagnon@fsi.ulaval.ca)

### Complaints and criticism

Any complaint and criticism related to this research project will be addressed to the Ombudsman office at Université Laval:

Pavillon Alphonse-Desjardins, bureau 3320  
2325, rue de l'Université  
Université Laval  
Québec (Québec) G1V 0A6  
Information - Secretariat : (418) 656-3081

Project approved by the sectorial committee of research ethics in health science of Université Laval (Approval number 2018-067), June 1<sup>st</sup> 2018. MPG

1 Research title: Personalize concerto: Patient usability experience optimized for embedded, coordinated, and efficient healthcare

2  
3  
4 Toll-free line: 1-866-323-2271

5 Email: [info@ombudsman.ulaval.ca](mailto:info@ombudsman.ulaval.ca)

## 6 Signatures

7  
8 I, the undersigned \_\_\_\_\_ freely consent to participate to the research entitled:  
9  
10 «Personalize concerto: Patient usability experience optimized for embedded, coordinated, and efficient  
11 healthcare». I have read and understood the aim, type, advantages, risks and disadvantages of the research  
12 project. I'm satisfied with the explanations, further details and responses received from the investigator, where  
13 appropriate, about my participation to this project.  
14  
15

16  
17  
18 \_\_\_\_\_  
19 Participant signature

\_\_\_\_\_ Date

20  
21 A short summary of the search results will be sent to you if requested by indicating the address where you would  
22 like to receive the document. **The results will not be available before December 20th. If your address changes  
23 by that date, you are invited to inform the research team, the new address you wish to receive the  
24 document.**  
25

26 I wish receive a short summary

No, I would prefer not to receive summary

27  
28  
29 I would like to receive the summary at the following email address or mailing address:

30  
31 \_\_\_\_\_  
32  
33 \_\_\_\_\_  
34  
35

36 I explained the aim, type of the study, advantages, risks and disadvantages of the research project I have  
37 answered to the best of my knowledge the questions asked and have verified the understanding of the  
38 participant.  
39

40  
41 \_\_\_\_\_  
42 Investigator or research coordinator signature

\_\_\_\_\_ Date

43  
44 Copy of the participant.  
45  
46  
47  
48  
49  
50  
51  
52  
53  
54  
55  
56  
57

58 Project approved by the sectorial committee of research ethics in health science of Université Laval (Approval number 2018-067),  
59 June 1<sup>st</sup> 2018. MPG

1 Research title: Personalize concerto: Patient usability experience optimized for embedded, coordinated, and efficient healthcare  
2  
3

4 **List of the team members/ Names of project**  
5 **partners**

**Role in the project**

6 Marie-Pierre Gagnon

Specialist of patient engagement and eHealth  
7 technology assessment

8 Christian Chabot

Patient partner, co-designer of the project

9 Guylaine Chabot, Alain Larouche

Technological partners

10 France Légaré, Anik Giguère, Annie LeBlanc

Experts in shared decision making

11 Samira Rahimi Abbasgholizadeh

Expert in decision aids tools

12 Jean-Paul Fortin, Aude Motulsky, Claude Sicotte

Experts in evaluation of health information  
13 systems

14 Holly Witteman

Expert in adaptation of user-centered technologies

15 Ronald Buyl

Expert in medical informatics and biostatistics

16 Carole Délétroz

Expert in health literacy

17 Erik Kavanagh, Frédéric Lépinay, Jacynthe  
18 Roberge

Specialists in application development and design

19 Amélie Lampron, Mame Awa Ndiaye

Research coordinators

Research title: Personalize concerto: Patient usability experience optimized for embedded, coordinated, and efficient healthcare

### **Supplementary File 8: Consent form (patients and informal caregivers) 2a**

This research entitled "Optimizing patient usability experience with an eHealth platform for embedded, coordinated and efficient healthcare" is conducted by Marie-Pierre Gagnon, from faculty of nursing at Université Laval.

Before you agree to take part in this research project, please take the time to read and understand the following information. This document will explain you the aim of this research project, his process, advantages, risks and disadvantages. We invite you to ask all questions you may deem necessary to the research staff. You can find their contact details at the end of the form.

#### **Type of study**

This research project aims to develop, implement and evaluate a user-centered, multifunctional and personalized eHealth platform (CONCERTO+) to promote a more active patient role in chronic disease management and decision-making, satisfaction towards healthcare services and quality of life. Specific objectives are to:

- 1) develop a module of a multifunctional and personalized eHealth platform integrated to the CHP (Concerto Health Program) for patients and caregivers allowing them to engage in the follow-up and management of their chronic diseases;
- 2) test the integration of CONCERTO+ in monitoring care pathways of three frequent co-existing chronic diseases (diabetes, hypertension, dyslipidemia) and assess the usefulness and acceptability of the solution for patients with chronic diseases and their caregivers;
- 3) assess the scalability of the CONCERTO+ solution.

#### **The course of the participation:**

##### **1) Validation of the prototype of the application CONCERTO+**

Your participation in this research will consist in using the application CONCERTO+ (intervention group) or to continue your usual health follow-up (control group). For the participants of the intervention group, the use of the application will be explained to you by the members of the research team. You will complete a short questionnaire at the beginning and at the end of a six months period use, which will focus on the following points:

- Health management
- Feelings in competency and self confidence in health management
- Impacts of CONCERTO+ use
- The use of CONCERTO+

##### **2) Focus group**

Your participation in this research consists in participating in a focus group composed of 8 -12 people. The discussion will last approximately two hours and will focus on conditions and factors related to the wide-scale dissemination of the solution CONCERTO+.

1 Research title: Personalize concerto: Patient usability experience optimized for embedded, coordinated, and efficient healthcare

## 2 3 4 5 **Potential benefits and risks or disadvantages related to your participation**

6 There are no direct benefits for the participants. However, participating in this research enables improve the  
7 adaptation and value of the CHP in order to provide a multifunctional and personalized eHealth platform, to  
8 promote a more active patient and informal care givers role in chronic disease management.

## 9 10 **Compensation**

11 If you accept to participate, a lump sum of 50 \$ will be offered to you for the time you have allocated for this  
12 activity. This sum will be returned to you during the focus group discussion.

## 13 14 15 **Voluntary participation and right to withdraw**

16 You are free to participate to this research project. You may voluntarily withdraw at any time without any  
17 justification and with no adverse consequences or without prejudice. However If you decide so, It is important to  
18 inform the research team whose contact details are included at the end of the document. All your personal  
19 information will be destroyed.

## 20 21 22 **Confidentiality and data management**

23 The following measures will be applied to ensure your private information stays private:

- 24 •Your name will not be mentioned in any report;
- 25 •The various documents will be codified and only the investigator and his team will have access to the list of  
26 names and codes;
- 27 • Your individual results will never be shared;
- 28 • In the interest of scientific rigor, the electronic data will be kept in a folder with a password on the web server of  
29 the Canada Research Chair on Technology and Practices in Health at Université Laval. They will be destroyed  
30 only five years after the end of the research, in December 2024;
- 31 • This research will be publicated in scientific reviews and no one can able to identify you;
- 32 • A short summary of the research results will be sent to you if requested by indicating the address where you  
33 would like to receive the document, just after the blank space provided for your signature.

## 34 35 36 **Acknowledgment**

37 Your collaboration is useful to achieve this study, thank you for your participation.

## 38 39 40 **Additional information**

41 If you have any question on the research, the involvement of your participation or if you want to withdraw from this  
42 research, please contact: Mame Awa Ndiaye, research coordinator, Amélie Lampron, research coordinator or  
43 Marie-Pierre Gagnon, principal investigator at the following coordinates:

- 44 • Mame Awa Ndiaye: [mame-awa.ndiaye.ciusscn@ssss.gouv.qc.ca](mailto:mame-awa.ndiaye.ciusscn@ssss.gouv.qc.ca)
- 45 • Amélie Lampron: [amelie.lampron2.ciusscn@ssss.gouv.qc.ca](mailto:amelie.lampron2.ciusscn@ssss.gouv.qc.ca)
- 46 • Marie-Pierre Gagnon: [marie-pierre.gagnon@fsi.ulaval.ca](mailto:marie-pierre.gagnon@fsi.ulaval.ca)

## 47 48 49 **Complaints and criticism**

50 Any complaint and criticism related to this research project will be addressed to the Ombudsman office at  
51 Université Laval:

52 Pavillon Alphonse-Desjardins, bureau 3320  
53 2325, rue de l'Université  
54 Université Laval  
55 Québec (Québec) G1V 0A6  
56 Information - Secretariat : (418) 656-3081

57  
58 Project approved by the sectorial committee of research ethics in health science of Université Laval (**Approval number 2018-067**),  
59 June 1<sup>st</sup> 2018. MPG

1 Research title: Personalize concerto: Patient usability experience optimized for embedded, coordinated, and efficient healthcare  
 2  
 3

4 Toll-free line: 1-866-323-2271

5 Email: [info@ombudsman.ulaval.ca](mailto:info@ombudsman.ulaval.ca)  
 6  
 7

### 8 Signatures

9 I, the undersigned \_\_\_\_\_ freely consent to participate to the research entitled:  
 10 «Personalize concerto: Patient usability experience optimized for embedded, coordinated, and efficient  
 11 healthcare». I have read and understood the aim, type, advantages, risks and disadvantages of the research  
 12 project. I' m satisfied with the explanations, further details and responses received from the investigator, where  
 13 appropriate, about my participation to this project.  
 14

15  
 16 \_\_\_\_\_  
 17 Participant signature

\_\_\_\_\_ Date

18  
 19 Do you wish to participate in the first step of this research involving the use of application CONCERTO+ and  
 20 the completion of two questionnaires on the active involvement?  
 21

22 Yes, i accept to participate

No, i would prefer not to participate

23  
 24 Do you wish to participate in the second step of the project involving the participation in a focus group on  
 25 factors and conditions related to the wide-scale dissemination of the solution CONCERTO+?  
 26

27  
 28 Yes, i accept to participate

No, i would prefer not to participate

29  
 30 A short summary of the search results will be sent to you if requested by indicating the address where you would  
 31 like to receive the document. **The results will not be available before December 20th. If your address changes  
 32 by that date, you are invited to inform the research team, the new address you wish to receive the  
 33 document.**  
 34

35 I wish receive a short summary

No, I would prefer not to receive summary

36 I would like to receive the summary at the following email address or mailing address:  
 37  
 38  
 39  
 40  
 41  
 42  
 43  
 44  
 45  
 46  
 47  
 48  
 49

50 \_\_\_\_\_  
 51 Investigator or research coordinator signature

\_\_\_\_\_ Date

52 **Copy of the participant.**  
 53  
 54  
 55  
 56  
 57

58 Project approved by the sectorial committee of research ethics in health science of Université Laval (**Approval number 2018-067**),  
 59 June 1<sup>st</sup> 2018. MPG

1 Research title: Personalize concerto: Patient usability experience optimized for embedded, coordinated, and efficient healthcare  
2  
3

### 4 **Supplementary File 9: Consent form (interviews)**

5  
6 This research entitled "Optimizing patient usability experience with an eHealth platform for embedded, coordinated  
7 and efficient healthcare" is conducted by Marie-Pierre Gagnon, from faculty of nursing at Université Laval.  
8  
9

10 Before you agree to take part in this research project, please take the time to read and understand the following  
11 information. This document will explain you the aim of this research project, his process, advantages, risks and  
12 disadvantages. We invite you to ask all questions you may deem necessary to the research staff. You can find  
13 their contact details at the end of the form.  
14  
15

#### 16 **Type of study**

17 This research project aims to develop, implement and evaluate a user-centered, multifunctional and personalized  
18 eHealth platform (CONCERTO+) to promote a more active patient role in chronic disease management and  
19 decision-making, satisfaction towards healthcare services and quality of life. Specific objectives are to:  
20

21 1) develop a module of a multifunctional and personalized eHealth platform integrated to the CHP (Concerto Health  
22 Program) for patients and caregivers allowing them to engage in the follow-up and management of their chronic  
23 diseases;  
24

25 2) test the integration of CONCERTO+ in monitoring care pathways of three frequent co-existing chronic diseases  
26 (diabetes, hypertension, dyslipidemia) and assess the usefulness and acceptability of the solution for patients with  
27 chronic diseases and their caregivers;  
28

29 3) assess the scalability of the CONCERTO+ solution.  
30

#### 31 **The course of the participation:**

32 Your participation to this research consists in participating in one-on-one semi-structured interview with a  
33 member of the team. This interview will last approximately 30 minutes and will focus on the following points:  
34

- 35 • Factors facilitating the use of CONCERTO+
- 36 • Factors limiting the use of CONCERTO+
- 37 • Support to the use of CONCERTO+ by health professionals
- 38 • Expansion of CONCERTO+
- 39
- 40
- 41
- 42
- 43
- 44
- 45
- 46
- 47
- 48
- 49
- 50
- 51
- 52
- 53
- 54
- 55
- 56
- 57

1 Research title: Personalize concerto: Patient usability experience optimized for embedded, coordinated, and efficient healthcare

## 2 3 4 5 **Potential benefits and risks or disadvantages related to your participation**

6 There are no direct benefits for the participants. However, participating in this research enables improve the  
7 adaptation and value of the CHP in order to provide a multifunctional and personalized eHealth platform, to  
8 promote a more active patient and informal care givers role in chronic disease management.

## 9 10 **Compensation**

11 If you accept to participate, a lump sum of 50 \$ will be offered to you for the time you have allocated for this  
12 activity. This sum will be returned to you during the focus group discussion.

## 13 14 15 **Voluntary participation and right to withdraw**

16 You are free to participate to this research project. You may voluntarily withdraw at any time without any  
17 justification and with no adverse consequences or without prejudice. However If you decide so, It is important to  
18 inform the research team whose contact details are included at the end of the document. All your personal  
19 information will be destroyed.

## 20 21 22 **Confidentiality and data management**

23 The following measures will be applied to ensure your private information stays private:

- 24 •Your name will not be mentioned in any report;
- 25 •The various documents will be codified and only the investigator and his team will have access to the list of  
26 names and codes;
- 27 • Your individual results will never be shared;
- 28 • In the interest of scientific rigor, the electronic data will be kept in a folder with a password on the web server of  
29 the Canada Research Chair on Technology and Practices in Health at Université Laval. They will be destroyed  
30 only five years after the end of the research, in December 2024;
- 31 • This research will be publicated in scientific reviews and no one can able to identify you;
- 32 • A short summary of the research results will be sent to you if requested by indicating the address where you  
33 would like to receive the document, just after the blank space provided for your signature.

## 34 35 36 **Acknowledgment**

37 Your collaboration is useful to achieve this study, thank you for your participation.

## 38 39 40 **Additional information**

41 If you have any question on the research, the involvement of your participation or if you want to withdraw from this  
42 research, please contact: Mame Awa Ndiaye, research coordinator, Amélie Lampron, research coordinator or  
43 Marie-Pierre Gagnon, principal investigator at the following coordinates:

- 44 • Mame Awa Ndiaye: mame-awa.ndiaye.ciussscn@ssss.gouv.qc.ca
- 45 • Amélie Lampron: amelie.lampron2.ciussscn@ssss.gouv.qc.ca
- 46 • Marie-Pierre Gagnon: [marie-pierre.gagnon@fsi.ulaval.ca](mailto:marie-pierre.gagnon@fsi.ulaval.ca)

## 47 48 49 **Complaints and criticism**

50 Any complaint and criticism related to this research project will be addressed to the Ombudsman office at  
51 Université Laval:

52 Pavillon Alphonse-Desjardins, bureau 3320  
53 2325, rue de l'Université  
54 Université Laval  
55 Québec (Québec) G1V 0A6  
56 Information - Secretariat : (418) 656-3081

57  
58 Project approved by the sectorial committee of research ethics in health science of Université Laval (**Approval number 2018-067**),  
59 June 1<sup>st</sup> 2018. MPG



Research title: Personalize concerto: Patient usability experience optimized for embedded, coordinated, and efficient healthcare

Toll-free line: 1-866-323-2271

Email: [info@ombudsman.ulaval.ca](mailto:info@ombudsman.ulaval.ca)

### Signatures

I, the undersigned \_\_\_\_\_ freely consent to participate to the research entitled: «Personalize concerto: Patient usability experience optimized for embedded, coordinated, and efficient healthcare». I have read and understood the aim, type, advantages, risks and disadvantages of the research project. I'm satisfied with the explanations, further details and responses received from the investigator, where appropriate, about my participation to this project.

\_\_\_\_\_  
Participant signature

\_\_\_\_\_  
Date

A short summary of the search results will be sent to you if requested by indicating the address where you would like to receive the document. **The results will not be available before December 20th. If your address changes by that date, you are invited to inform the research team, the new address you wish to receive the document.**

I wish receive a short summary  No, I would prefer not to receive summary

I would like to receive the summary at the following email address or mailing address:

\_\_\_\_\_  
\_\_\_\_\_

I explained the aim, type of the study, advantages, risks and disadvantages of the research project I have answered to the best of my knowledge the questions asked and have verified the understanding of the participant.

\_\_\_\_\_  
Investigator or research coordinator signature

\_\_\_\_\_  
Date

Copy of the participant.



STANDARD PROTOCOL ITEMS: RECOMMENDATIONS FOR INTERVENTIONAL TRIALS

**Introduction**

|                          |    |                                                                                                                                                                                                           |
|--------------------------|----|-----------------------------------------------------------------------------------------------------------------------------------------------------------------------------------------------------------|
| Background and rationale | 6a | Description of research question and justification for undertaking the trial, including summary of relevant studies (published and unpublished) examining benefits and harms for each intervention        |
|                          | 6b | Explanation for choice of comparators                                                                                                                                                                     |
| Objectives               | 7  | Specific objectives or hypotheses                                                                                                                                                                         |
| Trial design             | 8  | Description of trial design including type of trial (eg, parallel group, crossover, factorial, single group), allocation ratio, and framework (eg, superiority, equivalence, noninferiority, exploratory) |

| Pages |
|-------|
| 6     |
| 9     |

**Methods: Participants, interventions, and outcomes**

|                      |     |                                                                                                                                                                                                                                                                                                                                                                                |
|----------------------|-----|--------------------------------------------------------------------------------------------------------------------------------------------------------------------------------------------------------------------------------------------------------------------------------------------------------------------------------------------------------------------------------|
| Study setting        | 9   | Description of study settings (eg, community clinic, academic hospital) and list of countries where data will be collected. Reference to where list of study sites can be obtained                                                                                                                                                                                             |
| Eligibility criteria | 10  | Inclusion and exclusion criteria for participants. If applicable, eligibility criteria for study centres and individuals who will perform the interventions (eg, surgeons, psychotherapists)                                                                                                                                                                                   |
| Interventions        | 11a | Interventions for each group with sufficient detail to allow replication, including how and when they will be administered                                                                                                                                                                                                                                                     |
|                      | 11b | Criteria for discontinuing or modifying allocated interventions for a given trial participant (eg, drug dose change in response to harms, participant request, or improving/worsening disease)                                                                                                                                                                                 |
|                      | 11c | Strategies to improve adherence to intervention protocols, and any procedures for monitoring adherence (eg, drug tablet return, laboratory tests)                                                                                                                                                                                                                              |
|                      | 11d | Relevant concomitant care and interventions that are permitted or prohibited during the trial                                                                                                                                                                                                                                                                                  |
| Outcomes             | 12  | Primary, secondary, and other outcomes, including the specific measurement variable (eg, systolic blood pressure), analysis metric (eg, change from baseline, final value, time to event), method of aggregation (eg, median, proportion), and time point for each outcome. Explanation of the clinical relevance of chosen efficacy and harm outcomes is strongly recommended |

|       |
|-------|
| 13    |
| 13    |
| 13    |
| 13-15 |

1  
2  
3  
4  
5  
6  
7  
8  
9  
10  
11  
12  
13  
14  
15  
16  
17  
18  
19  
20  
21  
22  
23  
24  
25  
26  
27  
28  
29  
30  
31  
32  
33  
34  
35  
36  
37  
38  
39  
40  
41  
42  
43  
44  
45  
46  
47  
48  
49  
50  
51  
52  
53  
54  
55  
56  
57  
58  
59  
60

|                                                                     |     |                                                                                                                                                                                                                                                                                                                                                                                                              |    |
|---------------------------------------------------------------------|-----|--------------------------------------------------------------------------------------------------------------------------------------------------------------------------------------------------------------------------------------------------------------------------------------------------------------------------------------------------------------------------------------------------------------|----|
| 1Participant timeline                                               | 13  | Time schedule of enrolment, interventions (including any run-ins and washouts), assessments, and visits for participants. A schematic diagram is highly recommended (see Figure)                                                                                                                                                                                                                             | 15 |
| Sample size                                                         | 14  | Estimated number of participants needed to achieve study objectives and how it was determined, including clinical and statistical assumptions supporting any sample size calculations                                                                                                                                                                                                                        | 17 |
| Recruitment                                                         | 15  | Strategies for achieving adequate participant enrolment to reach target sample size                                                                                                                                                                                                                                                                                                                          | 17 |
| <b>Methods: Assignment of interventions (for controlled trials)</b> |     |                                                                                                                                                                                                                                                                                                                                                                                                              |    |
| Allocation:                                                         |     |                                                                                                                                                                                                                                                                                                                                                                                                              | 19 |
| Sequence generation                                                 | 16a | Method of generating the allocation sequence (eg, computer-generated random numbers), and list of any factors for stratification. To reduce predictability of a random sequence, details of any planned restriction (eg, blocking) should be provided in a separate document that is unavailable to those who enrol participants or assign interventions                                                     |    |
| Allocation concealment mechanism                                    | 16b | Mechanism of implementing the allocation sequence (eg, central telephone; sequentially numbered, opaque, sealed envelopes), describing any steps to conceal the sequence until interventions are assigned                                                                                                                                                                                                    |    |
| Implementation                                                      | 16c | Who will generate the allocation sequence, who will enrol participants, and who will assign participants to interventions                                                                                                                                                                                                                                                                                    |    |
| Blinding (masking)                                                  | 17a | Who will be blinded after assignment to interventions (eg, trial participants, care providers, outcome assessors, data analysts), and how                                                                                                                                                                                                                                                                    | 19 |
|                                                                     | 17b | If blinded, circumstances under which unblinding is permissible, and procedure for revealing a participant's allocated intervention during the trial                                                                                                                                                                                                                                                         |    |
| <b>Methods: Data collection, management, and analysis</b>           |     |                                                                                                                                                                                                                                                                                                                                                                                                              |    |
| Data collection methods                                             | 18a | Plans for assessment and collection of outcome, baseline, and other trial data, including any related processes to promote data quality (eg, duplicate measurements, training of assessors) and a description of study instruments (eg, questionnaires, laboratory tests) along with their reliability and validity, if known. Reference to where data collection forms can be found, if not in the protocol | 20 |
|                                                                     | 18b | Plans to promote participant retention and complete follow-up, including list of any outcome data to be collected for participants who discontinue or deviate from intervention protocols                                                                                                                                                                                                                    |    |

1  
2  
3  
4  
5  
6  
7  
8  
9  
10  
11  
12  
13  
14  
15  
16  
17  
18  
19  
20  
21  
22  
23  
24  
25  
26  
27  
28  
29  
30  
31  
32  
33  
34  
35  
36  
37  
38  
39  
40  
41  
42  
43  
44  
45  
46  
47  
48  
49  
50  
51  
52  
53  
54  
55  
56  
57  
58  
59  
60

|                                 |     |                                                                                                                                                                                                                                                                                                                                       |    |
|---------------------------------|-----|---------------------------------------------------------------------------------------------------------------------------------------------------------------------------------------------------------------------------------------------------------------------------------------------------------------------------------------|----|
| Data management                 | 19  | Plans for data entry, coding, security, and storage, including any related processes to promote data quality (eg, double data entry; range checks for data values). Reference to where details of data management procedures can be found, if not in the protocol                                                                     |    |
| Statistical methods             | 20a | Statistical methods for analysing primary and secondary outcomes. Reference to where other details of the statistical analysis plan can be found, if not in the protocol                                                                                                                                                              |    |
|                                 | 20b | Methods for any additional analyses (eg, subgroup and adjusted analyses)                                                                                                                                                                                                                                                              |    |
|                                 | 20c | Definition of analysis population relating to protocol non-adherence (eg, as randomised analysis), and any statistical methods to handle missing data (eg, multiple imputation)                                                                                                                                                       |    |
| <b>Methods: Monitoring</b>      |     |                                                                                                                                                                                                                                                                                                                                       |    |
| Data monitoring                 | 21a | Composition of data monitoring committee (DMC); summary of its role and reporting structure; statement of whether it is independent from the sponsor and competing interests; and reference to where further details about its charter can be found, if not in the protocol. Alternatively, an explanation of why a DMC is not needed |    |
|                                 | 21b | Description of any interim analyses and stopping guidelines, including who will have access to these interim results and make the final decision to terminate the trial                                                                                                                                                               |    |
| Harms                           | 22  | Plans for collecting, assessing, reporting, and managing solicited and spontaneously reported adverse events and other unintended effects of trial interventions or trial conduct                                                                                                                                                     |    |
| Auditing                        | 23  | Frequency and procedures for auditing trial conduct, if any, and whether the process will be independent from investigators and the sponsor                                                                                                                                                                                           |    |
| <b>Ethics and dissemination</b> |     |                                                                                                                                                                                                                                                                                                                                       |    |
| Research ethics approval        | 24  | Plans for seeking research ethics committee/institutional review board (REC/IRB) approval                                                                                                                                                                                                                                             | 21 |
| Protocol amendments             | 25  | Plans for communicating important protocol modifications (eg, changes to eligibility criteria, outcomes, analyses) to relevant parties (eg, investigators, REC/IRBs, trial participants, trial registries, journals, regulators)                                                                                                      |    |
| Consent or assent               | 26a | Who will obtain informed consent or assent from potential trial participants or authorised surrogates, and how (see Item 32)                                                                                                                                                                                                          |    |

|    |                   |     |                                                                      |
|----|-------------------|-----|----------------------------------------------------------------------|
| 1  |                   |     |                                                                      |
| 2  |                   | 26b | Additional consent provisions for collection and use of              |
| 3  |                   |     | participant data and biological specimens in ancillary studies, if   |
| 4  |                   |     | applicable                                                           |
| 5  |                   |     |                                                                      |
| 6  | Confidentiality   | 27  | How personal information about potential and enrolled                |
| 7  |                   |     | participants will be collected, shared, and maintained in order      |
| 8  |                   |     | to protect confidentiality before, during, and after the trial       |
| 9  |                   |     |                                                                      |
| 10 |                   |     |                                                                      |
| 11 | Declaration of    | 28  | Financial and other competing interests for principal                |
| 12 | interests         |     | investigators for the overall trial and each study site              |
| 13 |                   |     |                                                                      |
| 14 | Access to data    | 29  | Statement of who will have access to the final trial dataset, and    |
| 15 |                   |     | disclosure of contractual agreements that limit such access for      |
| 16 |                   |     | investigators                                                        |
| 17 |                   |     |                                                                      |
| 18 | Ancillary and     | 30  | Provisions, if any, for ancillary and post-trial care, and for       |
| 19 | post-trial care   |     | compensation to those who suffer harm from trial participation       |
| 20 |                   |     |                                                                      |
| 21 | Dissemination     | 31a | Plans for investigators and sponsor to communicate trial             |
| 22 | policy            |     | results to participants, healthcare professionals, the public, and   |
| 23 |                   |     | other relevant groups (eg, via publication, reporting in results     |
| 24 |                   |     | databases, or other data sharing arrangements), including any        |
| 25 |                   |     | publication restrictions                                             |
| 26 |                   |     |                                                                      |
| 27 |                   |     |                                                                      |
| 28 |                   | 31b | Authorship eligibility guidelines and any intended use of            |
| 29 |                   |     | professional writers                                                 |
| 30 |                   |     |                                                                      |
| 31 |                   | 31c | Plans, if any, for granting public access to the full protocol,      |
| 32 |                   |     | participant-level dataset, and statistical code                      |
| 33 |                   |     |                                                                      |
| 34 |                   |     |                                                                      |
| 35 | <b>Appendices</b> |     |                                                                      |
| 36 |                   |     |                                                                      |
| 37 | Informed consent  | 32  | Model consent form and other related documentation given to          |
| 38 | materials         |     | participants and authorised surrogates                               |
| 39 |                   |     |                                                                      |
| 40 | Biological        | 33  | Plans for collection, laboratory evaluation, and storage of          |
| 41 | specimens         |     | biological specimens for genetic or molecular analysis in the        |
| 42 |                   |     | current trial and for future use in ancillary studies, if applicable |
| 43 |                   |     |                                                                      |
| 44 |                   |     |                                                                      |
| 45 |                   |     |                                                                      |
| 46 |                   |     |                                                                      |
| 47 |                   |     |                                                                      |
| 48 |                   |     |                                                                      |
| 49 |                   |     |                                                                      |
| 50 |                   |     |                                                                      |
| 51 |                   |     |                                                                      |
| 52 |                   |     |                                                                      |
| 53 |                   |     |                                                                      |
| 54 |                   |     |                                                                      |
| 55 |                   |     |                                                                      |
| 56 |                   |     |                                                                      |
| 57 |                   |     |                                                                      |
| 58 |                   |     |                                                                      |
| 59 |                   |     |                                                                      |
| 60 |                   |     |                                                                      |

\*It is strongly recommended that this checklist be read in conjunction with the SPIRIT 2013 Explanation & Elaboration for important clarification on the items. Amendments to the protocol should be tracked and dated. The SPIRIT checklist is copyrighted by the SPIRIT Group under the Creative Commons "[Attribution-NonCommercial-NoDerivs 3.0 Unported](https://creativecommons.org/licenses/by-nc-nd/3.0/)" license.
