# Supplementary material for: Optimising patient active role with a user-centred eHealth platform (CONCERTO+) in chronic diseases management: a study protocol for a pilot cluster randomised controlled trial
Source: PubMed Central journal article supplement — BMJ Open. 2019 Apr 2;9(4):e028554. doi: 10.1136/bmjopen-2018-028554 (PMC6500232; doi:10.1136/bmjopen-2018-028554), 2019-04-02
Supplement: bmjopen-2018-028554.reviewer_comments.pdf [file bmjopen-2018-028554.reviewer_comments.pdf]

## PEER REVIEW HISTORY

BMJ Open publishes all reviews undertaken for accepted manuscripts. Reviewers are asked to complete a checklist review form (<http://bmjopen.bmj.com/site/about/resources/checklist.pdf>) and are provided with free text boxes to elaborate on their assessment. These free text comments are reproduced below.

## ARTICLE DETAILS

|                            |                                                                                                                                                                                                                                                                                                                                         |
|----------------------------|-----------------------------------------------------------------------------------------------------------------------------------------------------------------------------------------------------------------------------------------------------------------------------------------------------------------------------------------|
| <b>TITLE (PROVISIONAL)</b> | Optimizing patient active role with a user-centered eHealth platform (CONCERTO+) in chronic diseases management: A study protocol for a pilot cluster randomized controlled trial                                                                                                                                                       |
| <b>AUTHORS</b>             | Gagnon, Marie-Pierre; Ndiaye, Mame-Awa; Larouche, Alain; Chabot, Guylaine; Chabot, Christian; Buyl, Ronald; Fortin, Jean-Paul; Giguere, Anik; LeBlanc, Annie; Legare, France; Motulsky, Aude; Sicotte, Claude; Witteman, Holly; Kavanagh, Eric; Lépinay, Frédérick; Roberge, Jacynthe; Délétroz, Carole; Abbasgholizadeh, Samira Rahimi |

This article was not externally reviewed at BMJ Open. Protocols that have been independently assessed prior to submission to BMJ Open are usually fast-tracked to publication on the grounds that further substantial changes will not be possible. This independent assessment will usually be external, independent review for both a substantial grant award from a non-commercial or government funder and ethics approval.
